# Supplementary material for: A bioinformatic survey of distribution, conservation, and probable functions of LuxR solo regulators in bacteria
Source: Front Cell Infect Microbiol. 2015 Feb 24;5:16. doi: 10.3389/fcimb.2015.00016 (PMC4338825; doi:10.3389/fcimb.2015.00016)
Supplement: Supplementary file 1 [file Table1.XLSX]

## Sheet: Sheet1
	Bacteria	LuxR solo (Gene)	5' Gene product	3' Gene product	Endogenous LuxR/LuxI pair (Genes)
Non-proteobacteria
Actinobacteria	Mycobacterium smegmatis (strain ATCC 700084 / mc(2)155)	MSMEI_1050	Rieske iron-sulphur domain protein	ABC transporter solute binding protein	None
		MSMEG_1082	Rieske non-heme iron oxygenase	Conserved hypothetical protein
	Streptomyces sp. AA4	SSMG_04019	Conserved hypothetical protein (Amidase)	L-Lactate oxidase	None
	Streptomyces ghanaensis ATCC 14672	SSFG_00055	Replic relax superfamily protein	Metal dependent hydrolase	None
	Rhodococcus erythropolis	RHOER0001_5049	3-oxoacyl-[acyl-carrier-protein] reductase	Na+/solute symporter	None
	Mycobacterium smegmatis MKD8	D806_1111	Rieske [2Fe-2S] iron-sulphur	Peptide/opine/nickel uptake family ABC transporter, periplasmic substrate-binding protein	None
Chlamydiae/Verrucomicrobia group	Methylacidiphilum fumariolicum SolV	MFUM_710030	Regulator OmpR family	Hypothetical protein	None
	Methylacidiphilum infernorum (isolate V4)	Minf_0576	Gamma-glutamyl cyclotransferase	Hypothetical protein	None
Chrysiogenetes	Desulfurispirillum indicum (strain ATCC BAA-1389 / S5)	Selin_0676	Hypothetical protein	Hypothetical protein	None
Nitrospirae	Nitrospira defluvii	NIDE0589	Copper amine oxidase	Hypothetical protein	None
	Leptospirillum ferrooxidans (strain C2-3)	LFE_1606	TetR family transcriptional regulator	Cupin-like domain containing protein	None
Alphaproteobacteria
Caulobacterales	Asticcacaulis benevestitus DSM 16100 = ATCC BAA-896	ABENE_00635	endoglucanase	hypothetical protein	ABENE_20060/ABENE_20065
		ABENE_06910	hydrolase	trbI like protein
		ABENE_00650	hypothetical protein	hypothetical protein
		ABENE_20005	Phospholipase D like protein	hypothetical protein
	Asticcacaulis biprosthecum C19	ABI_17050	CytochromeB561	Sensory box protein	None
		ABI_40870	Hypothetical protein	Methyl-accepting chemotaxis protein MCP signaling domain protein
	Asticcacaulis excentricus (strain ATCC 15261 / DSM 4724 / VKM B-1370 / CB 48)	Astex_3433	alpha/beta hydrolase fold-3 domain protein	methyl-accepting chemotaxis sensory transducer with pas/pac sensor	Astex_2427/Astex_2428
	Asticcacaulis sp. AC460	ABAC460_16815	hypothetical protein	hypothetical protein	None
		ABAC460_07160	histidine kinase	hypothetical protein
	Asticcacaulis sp. AC466	AEAC466_18670	hypothetical protein	hypothetical protein	AEAC466_10535/AEAC466_10540
		AEAC466_04680	Sensory box protein	transcriptional regulator
		AEAC466_18680	hypothetical protein	hypothetical protein
	Asticcacaulis sp. YBE204	AEYBE204_15715	carbohydrate kinase	hypothetical protein	AEYBE204_04320/AEYBE204_04325
		AEYBE204_17070	hypothetical protein	hypothetical protein
		AEYBE204_09405	hypothetical protein	methyl-accepting chemotaxis sensory transducer
	Caulobacter crescentus OR37	None	None	None	OR37_02755/OR37_02757
	Caulobacter segnis (strain ATCC 21756 / DSM 7131 / JCM 7823 / NBRC 15250 / LMG 17158 / TK0059)	Cseg_3821	acyl-CoA dehydrogenase domain-containing protein	TetR family transcriptional regulator	None
	Caulobacter sp. (strain K31)	Caul_1362	acyl-CoA dehydrogenase domain-containing protein	ribokinase-like domain-containing protein	None
		Caul_2116	AraC family transcriptional regulator	hypothetical protein
	Phenylobacterium zucineum (strain HLK1)	PHZ_c2022	TonB-dependent receptor	TonB-dependent receptor	PHZ_p0005/PHZ_p0006
Rhizobiales	Aurantimonas manganoxydans (strain SI85-9A1)	SI859A1_03556	ATP-dependent hsl protease ATP-binding subunit HslU	Alkylated DNA repair protein AlkB	None
	Fulvimarina pelagi HTCC2506	FP2506_07391	Hypothetical protein	Alkylated DNA repair protein AlkB	None
	Bartonella tamiae Th239	None	None	None	ME5_00428/ME5_00429
	Bartonella tamiae Th307	None	None	None	MEG_01453/MEG_01452
	Beijerinckia indica subsp. indica (strain ATCC 9039 / DSM 1715 / NCIB 8712)	Bind_2507	chaperone protein HchA	short-chain dehydrogenase of various substrate specificities	Bind_0920/Bind_0919
		Bind_2976	2OG-Fe(II) oxygenase	phytanoyl-CoA dioxygenase	Bind_2973/Bind_2974
	Methylocella silvestris (strain BL2 / DSM 15510 / NCIMB 13906)	Msil_0694	ABC transporter, conserved site	hypothetical protein	Msil_0097/Msil_0098
		Msil_3348	hypothetical protein	hypothetical protein
	Afipia sp. 1NLS2	None	None	None	AfiDRAFT_1039/AfiDRAFT_1038
	Afipia sp. P52-10	X566_08905	PTS sugar transporter subunit IIA	transporter	X566_00540/X566_00425
	Bradyrhizobium diazoefficiens (strain JCM 10833 / IAM 13628 / NBRC 14792 / USDA 110)	blr1880	heat shock protein binding	hypothetical protein	blr1062(bjaR1)/blr1063solI
		bll1243	flavin dependant oxidoreductase	putative 2-pyrone-4,6-dicarboxylate hydrolase
	Bradyrhizobium diazoefficiens SEMIA 5080	BJA5080_072047	luciferase	2-pyrone-4,6-dicarboxylate hydrolase	BJA5080_074826/BJA5080_074820
		BJA5080_016421	putative 19.0 kDa protein in cobS 5'region	RNA polymerase sigma-54 factor 1
	Bradyrhizobium japonicum SEMIA 5079	BJS_08299	DnaJ-class molecular chaperone	Hypothetical protein	BJS_04784/BJS_04783
	Bradyrhizobium oligotrophicum S58	None	None	None	S58_60320/S58_60330
					S58_66850/S58_66860
					S58_09190/S58_09180
					S58_43750/S58_43760
	Bradyrhizobium sp. (strain ORS278)	None	None	None	BRADO0942/BRADO0941
	Bradyrhizobium sp. CCGE-LA001	BCCGELA001_28806	hypothetical protein	transmembrane transport protein	BCCGELA001_03540/BCCGELA001_03545
	Bradyrhizobium sp. DFCI-1	C207_04341	LysR family regulator	branched chain amino acid transport system	C207_04536/C207_04537
					C207_07121/C207_07120
	Bradyrhizobium sp. ORS 285	BRAO285_1350020	TPR repeat containing protein	hypothetical protein	BRAO285_1230027/BRAO285_1230025
					BRAO285_1610039/BRAO285_1610038
	Bradyrhizobium sp. ORS 375	None	None	None	BRAO375_2160019/BRAO375_2160018
					BRAO375_2650006/BRAO375_2650005
	Bradyrhizobium sp. S23321	None	None	None	S23_67520/S23_67510
	Bradyrhizobium sp. STM 3809	None	None	None	BRAS3809_210015/BRAS3809_210017
	Bradyrhizobium sp. STM 3843	None	None	None	BRAS3843_700030/BRAS3843_700031
	Bradyrhizobium sp. WSM1253	Bra1253DRAFT_05964	transposase	glycosyl transferase	Bra1253DRAFT_02652/Bra1253DRAFT_02653
					Bra1253DRAFT_04613/Bra1253DRAFT_04612
					Bra1253DRAFT_06145Bra1253DRAFT_06144
					Bra1253DRAFT_00362/ Bra1253DRAFT_00361
	Bradyrhizobium sp. WSM471	Bra471DRAFT_01478	acyl coA synthetase	transposase	Bra471DRAFT_01655/Bra471DRAFT_01654
					Bra471DRAFT_07226/Bra471DRAFT_07225
	Bradyrhizobium sp. YR681	None	None	None	PMI42_07397/PMI42_07398
	Nitrobacter sp. Nb-311A	None	None	None	NB311A_03294/NB311A_03299
	Nitrobacter winogradskyi (strain Nb-255 / ATCC 25391)	None	None	None	Nwi_0627/Nwi_0626
	Oligotropha carboxidovorans (strain ATCC 49405 / DSM 1227 / OM5)	OCA5_pOC16700130 (in the plasmid)	Cation translocating P-type ATPase	putative VirD2 family protein	OCA5_pHCG301160(traR)/OCA5_pHCG301280(traI)
					OCAR_7639/OCAR_7682
					OCA5_pHCG300180/OCA5_pHCG300170
	Rhodopseudomonas palustris (strain ATCC BAA-98 / CGA009)	None	None	None	RPA0321/RPA0320
	Rhodopseudomonas palustris (strain BisA53)	RPE_1282	phosphoglucomutase	hypothetical protein	RPE_2324/RPE_2323
	Rhodopseudomonas palustris (strain BisB18)	RPC_2210	oxidoreductase	hypothetical protein	RPC_2028/RPC_2029
					RPC_0702/RPC_0701
	Rhodopseudomonas palustris (strain BisB5)	None	None	None	RPD_2174/RPD_2175
					RPD_0402/RPD_0403
	Rhodopseudomonas palustris (strain DX-1)	None	None	None	Rpdx1_0305/Rpdx1_0306
					Rpdx1_0583/Rpdx1_0582
					Rpdx1_2085/Rpdx1_2086
	Rhodopseudomonas palustris (strain HaA2)	None	None	None	RPB_3321/RPB_3320
					RPB_0418/RPB_0417
	Rhodopseudomonas palustris (strain TIE-1)	None	None	None	Rpal_0323/Rpal_0322
					Rpal_2330/Rpal_2331
	Brucella abortus (strain 2308)	BAB2_0118(vjbR)	transcriptional regulator, LacI	hypothetical protein	None
		BAB1_0190	hypothetical protein	Aminotransferase
	Brucella abortus (strain S19)	BAbS19_I01800	B12-dependent methionine synthase	aminotransferase	None
		BAbS19_II01090	Transcriptional regulator, TetR family	hypothetical protein
	Brucella abortus 01-0065	L271_02199(vjbR)	hypothetical protein	hypothetical protein	None
		L271_01934	methionine synthase	hypothetical protein
	Brucella abortus 01-0585	L270_00181	methionine synthase	Aminotransferase	None
		L270_02198(vjbR)	Transcriptional regulator, TetR family	hypothetical protein
	Brucella abortus 01-0648	L269_02196(vjbR)	Transcriptional regulator, TetR family	hypothetical protein	None
		L269_00181	methionine synthase	Aminotransferase
	Brucella abortus 01-4165	P053_01883	methionine synthase	Aminotransferase	None
		P053_00539(vjbR)	Transcriptional regulator, TetR family	hypothetical protein
	Brucella abortus 03-2770-11	P051_01289(vjbR)	Transcriptional regulator, TetR family	hypothetical protein	None
		P051_00181	methionine synthase	Aminotransferase
	Brucella abortus 03-4923-239-D	P045_03134(vjbR)	Transcriptional regulator, TetR family	hypothetical protein	None
		P045_00113	methionine synthase	Aminotransferase
	Brucella abortus 07-0994-2411	P039_02112(vjbR)	Transcriptional regulator, TetR family	hypothetical protein	None
		P039_00049	methionine synthase	Aminotransferase
	Brucella abortus 225/65	B990_02144(vjbR)	Transcriptional regulator, TetR family	hypothetical protein	None
		B990_00489	methionine synthase	Aminotransferase
	Brucella abortus 355/78	B993_02989(vjbR)	Transcriptional regulator, TetR family	hypothetical protein	None
		B993_01988	methionine synthase	Aminotransferase
	Brucella abortus 544	B977_00692	methionine synthase	Aminotransferase	None
		B977_02292(vjbR)	Transcriptional regulator, TetR family	hypothetical protein
	Brucella abortus 600/64	C002_01992	methionine synthase	Aminotransferase	None
		C002_02305(vjbR)	Transcriptional regulator, TetR family	hypothetical protein
	Brucella abortus 63/130	B991_01980	methionine synthase	Aminotransferase	None
		B991_02982(vjbR)	Transcriptional regulator, TetR family	hypothetical protein
	Brucella abortus 63/138	B994_01984	methionine synthase	Aminotransferase	None
		B994_02984(vjbR)	Transcriptional regulator, TetR family	hypothetical protein
	Brucella abortus 63/144	B992_02972(vjbR)	Transcriptional regulator, TetR family	hypothetical protein	None
		B992_00486	methionine synthase	Aminotransferase
	Brucella abortus 63/168	C028_02116(vjbR)	Transcriptional regulator, TetR family	hypothetical protein	None
		C028_00128	methionine synthase	Aminotransferase
	Brucella abortus 63/294	C032_00115	methionine synthase	Aminotransferase	None
		C032_02992(vjbR)	Transcriptional regulator, TetR family	hypothetical protein
	Brucella abortus 63/59	C041_02737(vjbR)	Transcriptional regulator, TetR family	hypothetical protein	None
		C041_01628	methionine synthase	Aminotransferase
	Brucella abortus 64/108	C078_02151(vjbR)	Transcriptional regulator, TetR family	hypothetical protein	None
		C078_00114	methionine synthase	Aminotransferase
	Brucella abortus 64/122	C084_02846(vjbR)	Transcriptional regulator, TetR family	hypothetical protein	None
		C084_00052	methionine synthase	Aminotransferase
	Brucella abortus 64/81	B978_00495	methionine synthase	Aminotransferase	None
		B978_02290(vjbR)	Transcriptional regulator, TetR family	hypothetical protein
	Brucella abortus 65/110	C088_00115	methionine synthase	Aminotransferase	None
		C088_02723(vjbR)	Transcriptional regulator, TetR family	hypothetical protein
	Brucella abortus 65/157	C079_02104(vjbR)	Transcriptional regulator, TetR family	hypothetical protein	None
		C079_00115	methionine synthase	Aminotransferase
	Brucella abortus 65/63	B979_01983	methionine synthase	Aminotransferase	None
		B979_02289(vjbR)	Transcriptional regulator, TetR family	hypothetical protein
	Brucella abortus 67/781	C040_02256(vjbR)	Transcriptional regulator, TetR family	hypothetical protein	None
		C040_00154	methionine synthase	Aminotransferase
	Brucella abortus 67/93	B983_02987(vjbR)	Transcriptional regulator, TetR family	hypothetical protein	None
		B983_01986	methionine synthase	Aminotransferase
	Brucella abortus 68-3396P	L253_02197(vjbR)	Transcriptional regulator, TetR family	hypothetical protein	None
		L253_01932	methionine synthase	Aminotransferase
	Brucella abortus 76-1413	L254_00182	methionine synthase	Aminotransferase	None
		L254_02198(vjbR)	Transcriptional regulator, TetR family	hypothetical protein
	Brucella abortus 78/14	B996_02977(vjbR)	Transcriptional regulator, TetR family	hypothetical protein	None
		B996_01977	methionine synthase	Aminotransferase
	Brucella abortus 78/32	C981_02135(vjbR)	Transcriptional regulator, TetR family	hypothetical protein	None
		C981_00113	methionine synthase	Aminotransferase
	Brucella abortus 78/36	C055_02127(vjbR)	Transcriptional regulator, TetR family	hypothetical protein	None
		C055_00051	methionine synthase	Aminotransferase
	Brucella abortus 80-1399	L255_00178	methionine synthase	Aminotransferase	None
		L255_02192(vjbR)	Transcriptional regulator, TetR family	hypothetical protein
	Brucella abortus 80/101	C043_00115	methionine synthase	Aminotransferase	None
		C043_02441(vjbR)	Transcriptional regulator, TetR family	hypothetical protein
	Brucella abortus 80/102	C082_02719(vjbR)	Transcriptional regulator, TetR family	hypothetical protein	None
		C082_00114	methionine synthase	Aminotransferase
	Brucella abortus 80/108	C077_00153	methionine synthase	Aminotransferase	None
		C077_02154(vjbR)	Transcriptional regulator, TetR family	hypothetical protein
	Brucella abortus 80/28	B973_01982	methionine synthase	Aminotransferase	None
		B973_02995(vjbR)	Transcriptional regulator, TetR family	hypothetical protein
	Brucella abortus 82	P865_12265	Transcriptional regulator, TetR family	hypothetical protein	None
	Brucella abortus 82-2330	L256_00178	methionine synthase	Aminotransferase
		L256_02195(vjbR)	Transcriptional regulator, TetR family	hypothetical protein	None
	Brucella abortus 82-3893	L257_02201(vjbR)	Transcriptional regulator, TetR family	hypothetical protein
		L257_00182	methionine synthase	Aminotransferase	None
	Brucella abortus 84-0928	L258_00182	methionine synthase	Aminotransferase
		L258_02202(vjbR)	Transcriptional regulator, TetR family	hypothetical protein	None
	Brucella abortus 84/26	B971_02300(vjbR)	Transcriptional regulator, TetR family	hypothetical protein
		B971_00496	methionine synthase	Aminotransferase	None
	Brucella abortus 85-1058	L259_02197(vjbR)	Transcriptional regulator, TetR family	hypothetical protein
		L259_00182	methionine synthase	Aminotransferase	None
	Brucella abortus 85/140	C053_03156(vjbR)	Transcriptional regulator, TetR family	hypothetical protein
		C053_00114	methionine synthase	Aminotransferase	None
	Brucella abortus 85/69	C030_02208(vjbR)	Transcriptional regulator, TetR family	hypothetical protein
		C030_01022	methionine synthase	Aminotransferase	None
	Brucella abortus 863/67	C072_00113	methionine synthase	Aminotransferase
		C072_02110(vjbR)	Transcriptional regulator, TetR family	hypothetical protein	None
	Brucella abortus 87-0095	L260_01935	methionine synthase	Aminotransferase
		L260_02199(vjbR)	Transcriptional regulator, TetR family	hypothetical protein	None
	Brucella abortus 87-2211	L261_02200(vjbR)	Transcriptional regulator, TetR family	hypothetical protein
		L261_01921	methionine synthase	Aminotransferase	None
	Brucella abortus 87/28	B974_02987(vjbR)	Transcriptional regulator, TetR family	hypothetical protein
		B974_01988	methionine synthase	Aminotransferase	None
	Brucella abortus 877/67	C085_02104(vjbR)	Transcriptional regulator, TetR family	hypothetical protein
		C085_00113	methionine synthase	Aminotransferase	None
	Brucella abortus 88/19	C029_03145(vjbR)	Transcriptional regulator, TetR family	hypothetical protein
		C029_00116	methionine synthase	Aminotransferase	None
	Brucella abortus 88/217	C980_02020	methionine synthase	Aminotransferase
		C980_02969(vjbR)	Transcriptional regulator, TetR family	hypothetical protein	None
	Brucella abortus 88/226	C073_02250(vjbR)	Transcriptional regulator, TetR family	hypothetical protein
		C073_00114	methionine synthase	Aminotransferase	None
	Brucella abortus 89-0363	L262_02194(vjbR)	Transcriptional regulator, TetR family	hypothetical protein
		L262_00177	methionine synthase	Aminotransferase	None
	Brucella abortus 89-2646-1238	P042_02568	methionine synthase	Aminotransferase
		P042_01554(vjbR)	Transcriptional regulator, TetR family	hypothetical protein	None
	Brucella abortus 90-0737	L266_00182	methionine synthase	Aminotransferase
		L266_02200(vjbR)	Transcriptional regulator, TetR family	hypothetical protein	None
	Brucella abortus 90-0742	L264_00177	methionine synthase	Aminotransferase
		L264_02194(vjbR)	Transcriptional regulator, TetR family	hypothetical protein	None
	Brucella abortus 90-0775	L265_02197(vjbR)	Transcriptional regulator, TetR family	hypothetical protein
		L265_01973	methionine synthase	Aminotransferase	None
	Brucella abortus 90-0962	L263_00179	methionine synthase	Aminotransferase
		L263_02194(vjbR)	Transcriptional regulator, TetR family	hypothetical protein	None
	Brucella abortus 90-12178	P050_02828(vjbR)	Transcriptional regulator, TetR family	hypothetical protein
		P050_01022	methionine synthase	Aminotransferase	None
	Brucella abortus 90-1280	L267_02201(vjbR)	Transcriptional regulator, TetR family	hypothetical protein
		L267_00181	methionine synthase	Aminotransferase	None
	Brucella abortus 90/50	C075_02638(vjbR)	Transcriptional regulator, TetR family	hypothetical protein
		C075_00114	methionine synthase	Aminotransferase	None
	Brucella abortus 93/1	C076_00160	methionine synthase	Aminotransferase
		C076_02154(vjbR)	Transcriptional regulator, TetR family	hypothetical protein	None
	Brucella abortus 93/2	B981_02966 (vjbR)	Transcriptional regulator, TetR family	hypothetical protein
		B981_00489	methionine synthase	Aminotransferase	None
	Brucella abortus 94-1313	L268_02200(vjbR)	Transcriptional regulator, TetR family	hypothetical protein
		L268_00182	methionine synthase	Aminotransferase	None
	Brucella abortus 99-9971-135	P038_01888	methionine synthase	Aminotransferase
		P038_01434(vjbR)	Transcriptional regulator, TetR family	hypothetical protein	None
	Brucella abortus 99-9971-159	P047_01303	methionine synthase	Aminotransferase
		P047_00642(vjbR)	Transcriptional regulator, TetR family	hypothetical protein	None
	Brucella abortus A13334	BAA13334_I00163	methionine synthase	Aminotransferase
		BAA13334_II00402(vjbR)	Transcriptional regulator, TetR family	hypothetical protein	None
	Brucella abortus B10-0018	L272_02201(vjbR)	Transcriptional regulator, TetR family	hypothetical protein
		L272_01914	methionine synthase	Aminotransferase	None
	Brucella abortus B10-0091	L273_02199(vjbR)	Transcriptional regulator, TetR family	hypothetical protein
		L273_00181	methionine synthase	Aminotransferase	None
	Brucella abortus B10-0973	L274_02201(vjbR)	Transcriptional regulator, TetR family	hypothetical protein
		L274_01935	methionine synthase	Aminotransferase	None
	Brucella abortus BC95	N509_02212(vjbR)	Transcriptional regulator, TetR family	hypothetical protein
		N509_00180	methionine synthase	Aminotransferase	None
	Brucella abortus CNGB 1011	C975_02151(vjbR)	Transcriptional regulator, TetR family	hypothetical protein
		C975_01628	methionine synthase	Aminotransferase	None
	Brucella abortus CNGB 1432	C976_02154(vjbR)	Transcriptional regulator, TetR family	hypothetical protein
		C976_00114	methionine synthase	Aminotransferase	None
	Brucella abortus CNGB 308	C971_02153(vjbR)	Transcriptional regulator, TetR family	hypothetical protein
		C971_00114	methionine synthase	Aminotransferase	None
	Brucella abortus CNGB 436	C970_02933(vjbR)	Transcriptional regulator, TetR family	hypothetical protein
		C970_01052	methionine synthase	Aminotransferase	None
	Brucella abortus CNGB 752	C972_00114	methionine synthase	Aminotransferase
		C972_02154(vjbR)	Transcriptional regulator, TetR family	hypothetical protein	None
	Brucella abortus CNGB 759	C973_03144(vjbR)	Transcriptional regulator, TetR family	hypothetical protein
		C973_00152	methionine synthase	Aminotransferase	None
	Brucella abortus CNGB 966	C974_02153(vjbR)	Transcriptional regulator, TetR family	hypothetical protein
		C974_00156	methionine synthase	Aminotransferase	None
	Brucella abortus F1/06 B1	C070_02150(vjbR)	Transcriptional regulator, TetR family	hypothetical protein
		C070_00160	methionine synthase	Aminotransferase	None
	Brucella abortus F1/06-B21	B995_02992(vjbR)	Transcriptional regulator, TetR family	hypothetical protein
		B995_01983	methionine synthase	Aminotransferase	None
	Brucella abortus F10/05-11	B972_02290(vjbR)	Transcriptional regulator, TetR family	hypothetical protein
		B972_01982	methionine synthase	Aminotransferase	None
	Brucella abortus F10/06-3	B982_01983	methionine synthase	Aminotransferase
		B982_02978(vjbR)	Transcriptional regulator, TetR family	hypothetical protein	None
	Brucella abortus F2/06-8	C071_02657(vjbR)	Transcriptional regulator, TetR family	hypothetical protein
		C071_00161	methionine synthase	Aminotransferase	None
	Brucella abortus F3/01-300	C984_02152(vjbR)	Transcriptional regulator, TetR family	hypothetical protein
		C984_00152	methionine synthase	Aminotransferase	None
	Brucella abortus F3/07-1	C042_02149(vjbR)	Transcriptional regulator, TetR family	hypothetical protein
		C042_00114	methionine synthase	Aminotransferase	None
	Brucella abortus F5/04-7	C081_02443(vjbR)	Transcriptional regulator, TetR family	hypothetical protein
		C081_00051	methionine synthase	Aminotransferase	None
	Brucella abortus F6/05-2	C031_03010(vjbR)	Transcriptional regulator, TetR family	hypothetical protein
		C031_00115	methionine synthase	Aminotransferase	None
	Brucella abortus F6/05-3	C086_02983(vjbR)	Transcriptional regulator, TetR family	hypothetical protein
		C086_00153	methionine synthase	Aminotransferase	None
	Brucella abortus F6/05-4	C054_02325(vjbR)	Transcriptional regulator, TetR family	hypothetical protein
		C054_00116	methionine synthase	Aminotransferase	None
	Brucella abortus F6/05-9	C087_02538(vjbR)	Transcriptional regulator, TetR family	hypothetical protein
		C087_00162	methionine synthase	Aminotransferase	None
	Brucella abortus I103_(UK3/01)	C069_02111(vjbR)	Transcriptional regulator, TetR family	hypothetical protein
		C069_00114	methionine synthase	Aminotransferase	None
	Brucella abortus LEVI237	C083_02134(vjbR)	Transcriptional regulator, TetR family	hypothetical protein
		C083_00052	methionine synthase	Aminotransferase	None
	Brucella abortus NCTC 8038	BAUG_0190	Transcriptional regulator, TetR family	hypothetical protein
		BAUG_2259	methionine synthase	Aminotransferase	None
	Brucella abortus NI240	C014_02155(vjbR)	Transcriptional regulator, TetR family	hypothetical protein
		C014_00170	methionine synthase	Aminotransferase	None
	Brucella abortus NI274	C015_00161	methionine synthase	Aminotransferase
		C015_02255(vjbR)	Transcriptional regulator, TetR family	hypothetical protein	None
	Brucella abortus NI352	C016_02111(vjbR)	Transcriptional regulator, TetR family	hypothetical protein
		C016_00161	methionine synthase	Aminotransferase	None
	Brucella abortus NI380	C017_02154(vjbR)	Transcriptional regulator, TetR family	hypothetical protein
		C017_00114	methionine synthase	Aminotransferase	None
	Brucella abortus NI388	C018_02153(vjbR)	Transcriptional regulator, TetR family	hypothetical protein
		C018_00114	methionine synthase	Aminotransferase	None
	Brucella abortus NI422	C019_00161	methionine synthase	Aminotransferase
		C019_02153(vjbR)	Transcriptional regulator, TetR family	hypothetical protein	None
	Brucella abortus NI492	C020_02149(vjbR)	Transcriptional regulator, TetR family	hypothetical protein
		C020_00152	methionine synthase	Aminotransferase	None
	Brucella abortus NI495a	C021_02155(vjbR)	Transcriptional regulator, TetR family	hypothetical protein
		C021_00154	methionine synthase	Aminotransferase	None
	Brucella abortus NI518	C012_02154(vjbR)	Transcriptional regulator, TetR family	hypothetical protein
		C012_00506	methionine synthase	Aminotransferase	None
	Brucella abortus NI593	C022_00153	methionine synthase	Aminotransferase
		C022_02112(vjbR)	Transcriptional regulator, TetR family	hypothetical protein	None
	Brucella abortus NI613	C023_00160	methionine synthase	Aminotransferase
		C023_02110(vjbR)	Transcriptional regulator, TetR family	hypothetical protein	None
	Brucella abortus NI622	C024_00152	methionine synthase	Aminotransferase
		C024_02152(vjbR)	Transcriptional regulator, TetR family	hypothetical protein	None
	Brucella abortus NI628	C011_03054(vjbR)	Transcriptional regulator, TetR family	hypothetical protein
		C011_00160	methionine synthase	Aminotransferase	None
	Brucella abortus NI633	C025_02564 (vjbR)	Transcriptional regulator, TetR family	hypothetical protein
		C025_00154	methionine synthase	Aminotransferase	None
	Brucella abortus NI639	C026_02111(vjbR)	Transcriptional regulator, TetR family	hypothetical protein
		C026_00115	methionine synthase	Aminotransferase	None
	Brucella abortus NI645	C027_00115	methionine synthase	Aminotransferase
		C027_02928(vjbR)	Transcriptional regulator, TetR family	hypothetical protein	None
	Brucella abortus NI649	C013_03143(vjbR)	Transcriptional regulator, TetR family	hypothetical protein
		C013_00160	methionine synthase	Aminotransferase	None
	Brucella abortus R42-08	B980_00493	methionine synthase	Aminotransferase
		B980_02973(vjbR)	Transcriptional regulator, TetR family	hypothetical protein	None
	Brucella abortus RB51-AHVLA	D803_02155(vjbR)	Transcriptional regulator, TetR family	hypothetical protein
		D803_00154	methionine synthase	Aminotransferase	None
	Brucella abortus S99	P408_13300	methionine synthase	Aminotransferase
		P408_05235(vjbR)	Transcriptional regulator, TetR family	hypothetical protein	None
	Brucella abortus biovar 1 (strain 9-941)	BruAb2_0117(vjbR)	Transcriptional regulator, TetR family	hypothetical protein
		BruAb1_0185	methionine synthase	Aminotransferase	None
	Brucella abortus bv. 1 str. NI010	M1G_00486	methionine synthase	Aminotransferase
		M1G_02044(vjbR)	Transcriptional regulator, TetR family	hypothetical protein	None
	Brucella abortus bv. 1 str. NI016	M1I_00485	methionine synthase	Aminotransferase
		M1I_02044(vjbR)	Transcriptional regulator, TetR family	hypothetical protein	None
	Brucella abortus bv. 1 str. NI021	M1K_01359	methionine synthase	Aminotransferase
		M1K_02042(vjbR)	Transcriptional regulator, TetR family	hypothetical protein	None
	Brucella abortus bv. 1 str. NI259	M1M_01327(vjbR)	Transcriptional regulator, TetR family	hypothetical protein
		M1M_02701	methionine synthase	Aminotransferase	None
	Brucella abortus bv. 1 str. NI435a	M17_01361	methionine synthase	Aminotransferase
		M17_02742(vjbR)	Transcriptional regulator, TetR family	hypothetical protein	None
	Brucella abortus bv. 1 str. NI474	M19_00486	methionine synthase	Aminotransferase
		M19_02046	Transcriptional regulator, TetR family	hypothetical protein	None
	Brucella abortus bv. 1 str. NI486	M1A_02152(vjbR)	Transcriptional regulator, TetR family	hypothetical protein
		M1A_02452	methionine synthase	Aminotransferase	None
	Brucella abortus bv. 1 str. NI488	M1E_00895(vjbR)	Transcriptional regulator, TetR family	hypothetical protein
		M1E_02334	methionine synthase	Aminotransferase	None
	Brucella abortus bv. 2 str. 86/8/59	BADG_00499	methionine synthase	Aminotransferase
		BADG_02095	Transcriptional regulator, TetR family	hypothetical protein	None
	Brucella abortus bv. 3 str. Tulya	BACG_02412	methionine synthase	Aminotransferase
		BACG_00204	Transcriptional regulator, TetR family	hypothetical protein	None
	Brucella abortus bv. 4 str. 292	BABG_02385	methionine synthase	Aminotransferase
		BABG_00199	Transcriptional regulator, TetR family	hypothetical protein	None
	Brucella abortus bv. 5 str. B3196	BAYG_00493	methionine synthase	Aminotransferase
		BAYG_02758	Transcriptional regulator, TetR family	hypothetical protein	None
	Brucella abortus bv. 6 str. 870	BAAG_02389	methionine synthase	Aminotransferase
		BAAG_00910	Transcriptional regulator, TetR family	hypothetical protein	None
	Brucella abortus bv. 9 str. C68	BARG_00895	Transcriptional regulator, TetR family	hypothetical protein
		BARG_02353	Dihydroxyacid dehydratase	Aminotransferase	None
	Brucella abortus levi gila	C080_00161	methionine synthase	Aminotransferase
		C080_02192(vjbR)	Transcriptional regulator, TetR family	hypothetical protein	None
	Brucella abortus str. 2308 A	BAAA_1000194	methionine synthase	Aminotransferase
	Brucella canis (strain ATCC 23365 / NCTC 10854)	BCAN_A0195	Dihydroxyacid dehydratase	Aminotransferase	None
		BCAN_B0123	Transcriptional regulator, TetR family	hypothetical protein
	Brucella canis 04-2330-1	P036_01972(vjbR)	Transcriptional regulator, TetR family	hypothetical protein	None
		P036_00051	methionine synthase	Aminotransferase
	Brucella canis 79/122	B976_02655(vjbR)	Transcriptional regulator, TetR family	hypothetical protein	None
		B976_01718	methionine synthase	Aminotransferase
	Brucella canis 96-7258	P037_02022(vjbR)	Transcriptional regulator, TetR family	hypothetical protein	None
		P037_00126	methionine synthase	Aminotransferase
	Brucella canis CNGB 1172	C969_02279(vjbR)	Transcriptional regulator, TetR family	hypothetical protein	None
		C969_00154	methionine synthase	Aminotransferase
	Brucella canis CNGB 1324	C967_02366(vjbR)	Transcriptional regulator, TetR family	hypothetical protein	None
		C967_00050	methionine synthase	Aminotransferase
	Brucella canis CNGB 513	C968_02060(vjbR)	Transcriptional regulator, TetR family	hypothetical protein	None
		C968_00129	methionine synthase	Aminotransferase
	Brucella canis F7/05A	C982_02736(vjbR)	Transcriptional regulator, TetR family	hypothetical protein	None
		C982_00111	methionine synthase	Aminotransferase
	Brucella canis HSK A52141	BCA52141_I1385	methionine synthase	Aminotransferase	None
		BCA52141_II1048(vjbR)	Transcriptional regulator, TetR family	hypothetical protein
	Brucella canis UK10/02	C979_01714	methionine synthase	Aminotransferase	None
		C979_02092(vjbR)	Transcriptional regulator, TetR family	hypothetical protein
	Brucella ceti B1/94	BAQG_02042	Transcriptional regulator, TetR family	hypothetical protein	None
		BAQG_00497	methionine synthase	Aminotransferase
	Brucella ceti M13/05/1	BAJG_00206	Transcriptional regulator, TetR family	hypothetical protein	None
		BAJG_01634	methionine synthase	Aminotransferase
	Brucella ceti M490/95/1	BAPG_02460(BcetM4_010100004850)	Transcriptional regulator, TetR family	hypothetical protein	None
		BAPG_00499	Dehyroxyacid dehydratase	Aminotransferase
	Brucella ceti M644/93/1	BAIG_00202	Transcriptional regulator, TetR family	hypothetical protein	None
		BAIG_01537	methionine synthase	Aminotransferase
	Brucella ceti str. Cudo	BCETI_1000363	methionine synthase	Aminotransferase	None
		BCETI_6000434	Transcriptional regulator, TetR family	hypothetical protein
	Brucella inopinata BO1	BIBO1_1129	hypothetical protein	Aminotransferase	None
		BIBO1_3030	Transcriptional regulator, TetR family	hypothetical protein
	Brucella melitensis (strain M5-90)	BM590_A0199	methionine synthase	Aminotransferase	None
		BM590_B0120	Transcriptional regulator, TetR family	hypothetical protein
	Brucella melitensis (strain M28)	BM28_A0202	methionine synthase	Aminotransferase	None
		BM28_B0120	Transcriptional regulator, TetR family	hypothetical protein
	Brucella melitensis 02-5863-1	P043_01299	methionine synthase	Aminotransferase	None
		P043_00666(vjbR)	Transcriptional regulator, TetR family	hypothetical protein
	Brucella melitensis 02-7258	P052_01233	methionine synthase	Aminotransferase	None
		P052_01107(vjbR)	Transcriptional regulator, TetR family	hypothetical protein
	Brucella melitensis 11-1823-3434	P040_00964	methionine synthase	Aminotransferase	None
		P040_00838(vjbR)	Transcriptional regulator, TetR family	hypothetical protein
	Brucella melitensis 64/150	C045_01958	methionine synthase	Aminotransferase	None
		C045_03183(vjbR)	Transcriptional regulator, TetR family	hypothetical protein
	Brucella melitensis 66/59	C089_01954	methionine synthase	Aminotransferase	None
		C089_03159(vjbR)	Transcriptional regulator, TetR family	hypothetical protein
	Brucella melitensis B115	D627_01386	methionine synthase	Aminotransferase	None
		D627_02732(vjbR)	Transcriptional regulator, TetR family	hypothetical protein
	Brucella melitensis BG2 (S27)	C005_00103	methionine synthase	Aminotransferase	None
		C005_02730(vjbR)	Transcriptional regulator, TetR family	hypothetical protein
	Brucella melitensis CNGB 1076	C962_01588	methionine synthase	Aminotransferase	None
		C962_02732(vjbR)	Transcriptional regulator, TetR family	hypothetical protein
	Brucella melitensis CNGB 1120	C963_02735(vjbR)	Transcriptional regulator, TetR family	hypothetical protein	None
		C963_01393	methionine synthase	Aminotransferase
	Brucella melitensis CNGB 290	C964_02730(vjbR)	Transcriptional regulator, TetR family	hypothetical protein	None
		C964_02021	methionine synthase	Aminotransferase
	Brucella melitensis F1/06 B10	C036_03183(vjbR)	Transcriptional regulator, TetR family	hypothetical protein	None
		C036_01922	methionine synthase	Aminotransferase
	Brucella melitensis F10/05-2	C057_01827	methionine synthase	Aminotransferase	None
		C057_03209(vjbR)	Transcriptional regulator, TetR family	hypothetical protein
	Brucella melitensis F10/06-16	B970_02948(vjbR)	Transcriptional regulator, TetR family	hypothetical protein	None
		B970_01579	methionine synthase	Aminotransferase
	Brucella melitensis F15/06-7	D628_02455(vjbR)	Transcriptional regulator, TetR family	hypothetical protein	None
		D628_01577	methionine synthase	Aminotransferase
	Brucella melitensis F2/06-6	C091_02286(vjbR)	Transcriptional regulator, TetR family	hypothetical protein	None
		C091_02009	methionine synthase	Aminotransferase
	Brucella melitensis F3/02	C056_01919	methionine synthase	Aminotransferase	None
		C056_03175(vjbR)	Transcriptional regulator, TetR family	hypothetical protein
	Brucella melitensis F5/07-239A	C061_00347	methionine synthase	Aminotransferase	None
		C061_02543(vjbR)	Transcriptional regulator, TetR family	hypothetical protein
	Brucella melitensis F6/05-6	C004_03177(vjbR)	Transcriptional regulator, TetR family	hypothetical protein	None
		C004_00102	methionine synthase	Aminotransferase
	Brucella melitensis F8/01-155	C090_03184(vjbR)	Transcriptional regulator, TetR family	hypothetical protein	None
		C090_01959	methionine synthase	Aminotransferase
	Brucella melitensis F9/05	C003_02119(vjbR)	Transcriptional regulator, TetR family	hypothetical protein	None
		C003_01918	methionine synthase	Aminotransferase
	Brucella melitensis NI	BMNI_I0188(solR)	methionine synthase	Aminotransferase	None
		BMNI_II0115	Transcriptional regulator, TetR family	hypothetical protein
	Brucella melitensis R3/07-2	C035_02692(vjbR)	Transcriptional regulator, TetR family	hypothetical protein	None
		C035_02022	methionine synthase	Aminotransferase
	Brucella melitensis UK14/06	C034_02460(vjbR)	Transcriptional regulator, TetR family	hypothetical protein	None
		C034_01577	methionine synthase	Aminotransferase
	Brucella melitensis UK19/04	C048_02739(vjbR)	Transcriptional regulator, TetR family	hypothetical protein	None
		C048_01964	methionine synthase	Aminotransferase
	Brucella melitensis UK22/04	C060_03211(vjbR)	Transcriptional regulator, TetR family	hypothetical protein	None
		C060_01751	methionine synthase	Aminotransferase
	Brucella melitensis UK22/06	C046_03127(vjbR)	Transcriptional regulator, TetR family	hypothetical protein	None
		C046_00102	methionine synthase	Aminotransferase
	Brucella melitensis UK23/06	C059_02729(vjbR)	Transcriptional regulator, TetR family	hypothetical protein	None
		C059_01573	methionine synthase	Aminotransferase
	Brucella melitensis UK29/05	B975_03120 (vjbR)	Transcriptional regulator, TetR family	hypothetical protein	None
		B975_01583	methionine synthase	Aminotransferase
	Brucella melitensis UK3/06	B997_03116 (vjbR)	Transcriptional regulator, TetR family	hypothetical protein	None
		B997_01582	methionine synthase	Aminotransferase
	Brucella melitensis UK31/99	B984_03032(vjbR)	Transcriptional regulator, TetR family	hypothetical protein	None
		B984_01601	methionine synthase	Aminotransferase
	Brucella melitensis UK37/05	C033_02737(vjbR)	Transcriptional regulator, TetR family	hypothetical protein	None
		C033_01960	methionine synthase	Aminotransferase
	Brucella melitensis Uk24/06	C047_01579	methionine synthase	Aminotransferase	None
		C047_02737(vjbR)	Transcriptional regulator, TetR family	hypothetical protein
	Brucella melitensis biotype 1 (strain 16M / ATCC 23456 / NCTC 10094)	BMEII1116(vjbR)	Transcriptional regulator, TetR family	hypothetical protein	None
		BAWG_1489	Transcriptional regulator, TetR family	hypothetical protein
		BMEI1758(BAWG_0477)	methionine synthase	Aminotransferase
	Brucella melitensis bv. 1 str. Rev.1	BAMG_01476(Bmelb1R_010100001092 )	Transcriptional regulator, TetR family	hypothetical protein	None
		BAMG_02883	methionine synthase	Aminotransferase
	Brucella melitensis biotype 2 (strain ATCC 23457)	BMEA_A0198(solR)	methionine synthase	Aminotransferase	None
		BMEA_B0122	Transcriptional regulator, TetR family	hypothetical protein
	Brucella melitensis bv. 2 str. 63/9	BASG_02561(Bmelb26_010100005617)	Transcriptional regulator, TetR family	hypothetical protein	None
		BASG_01210	methionine synthase	Aminotransferase
	Brucella melitensis bv. 3 str. Ether	BAOG_02216(Bmelb3E_010100004805)	Transcriptional regulator, TetR family	hypothetical protein	None
		BAOG_02925	methionine synthase	Aminotransferase
	Brucella microti (strain CCM 4915)	BMI_I193	Dihydroxyacid dehydratase	Aminotransferase	None
		BMI_II119	Transcriptional regulator, TetR family	Pseudogene
	Brucella neotomae 5K33	BANG_02816	Transcriptional regulator, TetR family	hypothetical protein	None
		BANG_00492	Dihydroxyacid dehydratase	Aminotransferase
	Brucella ovis (strain ATCC 25840 / 63/290 / NCTC 10512)	BOV_A0110(vjbR)	Transcriptional regulator, TetR family	hypothetical protein	None
		BOV_0183	methionine synthase	Aminotransferase
	Brucella pinnipedialis (strain NCTC 12890 / BCCN 94-73 / B2/94)	BAHG_00495	methionine synthase	Aminotransferase	None
		BAHG_02087	Transcriptional regulator, TetR family	hypothetical protein
		BPI_I191	methionine synthase	Aminotransferase
	Brucella suis 01-5744	B985_02017(vjbR)	Transcriptional regulator, TetR family	hypothetical protein	None
		B985_01754	3-Methionine synthase	Aminotransferase
	Brucella suis biovar 1 (strain 1330)	BRA0119, BS1330_II0118 (vjbR)	Transcriptional regulator, TetR family	hypothetical protein	None
		BR0190, BS1330_I0190	hypothetical protein	Aminotransferase
	Brucella suis (strain ATCC 23445 / NCTC 10510)	BSUIS_B0125	Transcriptional regulator, TetR family	hypothetical protein	None
		BSUIS_A0191(solR)	hypothetical protein	Aminotransferase
	Brucella suis bv. 3 str. 686	BAFG_00200	Transcriptional regulator, TetR family	hypothetical protein	None
		BAFG_02411	methionine synthase	Aminotransferase
	Brucella suis bv. 4 str. 40	BAVG_1291	methionine synthase	Aminotransferase	None
		BAVG_2661	Transcriptional regulator, TetR family	hypothetical protein
	Brucella suis bv. 5 str. 513	BAEG_02101(Bsuib55_010100001004)	Transcriptional regulator, TetR family	hypothetical protein	None
		BAEG_00502	methionine synthase	Aminotransferase
	Ochrobactrum anthropi (strain ATCC 49188 / DSM 6882 / NCTC 12168)	Oant_0198	methionine synthase	Aminotransferase	None
		Oant_4224	Transcriptional regulator, TetR family	hypothetical protein
	Ochrobactrum intermedium LMG 3301	OINT_1000203	methionine synthase	Aminotransferase	None
		OINT_2001300	Transcriptional regulator, TetR family	hypothetical protein
	Ochrobactrum intermedium M86	D584_09860	Transcriptional regulator, TetR family	hypothetical protein	D584_23401/D584_23406
		D584_05133	methionine synthase	Aminotransferase
	Ochrobactrum sp. CDB2	WYI_11703	Transcriptional regulator, TetR family	hypothetical protein	WYI_23175/WYI_23180
		WYI_02549	methionine synthase	hypothetical protein
	Ochrobactrum sp. EGD-AQ16	O206_22835	methionine synthase	hypothetical protein	O206_22800(TraR)/O206_22825 (TraI)
		O206_15950	Transcriptional regulator, TetR family	hypothetical protein
		O206_04475	methionine synthase	Amino transferase
	Pelagibacterium halotolerans (strain JCM 15775 / CGMCC 1.7692 / B2)	KKY_2856	hypothetical protein	Transcriptional regulator, LuxR superfamily, the next gene is TetR transcriptional regulator	None
	Rhodomicrobium udaipurense JA643	None	None	None	T281_16895/T281_16890
	Rhodomicrobium vannielii (strain ATCC 17100 / ATH 3.1.1 / DSM 162 / LMG 4299)	None	None	None	Rvan_2684/Rvan_2683
	Methylobacterium extorquens (strain ATCC 14718 / DSM 1338 / AM1)	MexAM1_META2p0955 (located on megaplasmid)	hypothetical protein	Autoinducer binding domain containing LuxR regulator	MexAM1_META1p4962/MexAM1_META1p4961
		MexAM1_META2p0956 (Located on megaplasmid)	Autoinducer binding domain containing LuxR regulator	hypothetical protein	MexAM1_META2p0694/MexAM1_META2p0693
	Methylobacterium extorquens (strain CM4 / NCIMB 13688)	None	None	None	Mchl_4977/Mchl_4976
	Methylobacterium extorquens (strain DSM 5838 / DM4)	None	None	None	METDI5551/METDI5550
	Methylobacterium extorquens (strain PA1)	None	None	None	Mext_4514/Mext_4513
	Methylobacterium extorquens DSM 13060	MetexDRAFT_1418	Autoinducer binding domain containing LuxR regulator	hypothetical protein	MetexDRAFT_1855/MetexDRAFT_1854
		MetexDRAFT_1419	hypothetical protein	Autoinducer binding domain containing LuxR regulator	MetexDRAFT_2598/MetexDRAFT_2597
	Methylobacterium nodulans (strain ORS2060 / LMG 21967)	Mnod_1003	ATPase associated with various cellular activities AAA_3	Pseudogene	Mnod_0282/Mnod_0283
					Mnod_0943/Mnod_0941
					Mnod_1766/Mnod_1765
	Methylobacterium populi (strain ATCC BAA-705 / NCIMB 13946 / BJ001)	None	None	None	Mpop_5029/Mpop_5028
	Methylobacterium radiotolerans (strain ATCC 27329 / DSM 1819 / JCM 2831)	None	None	None	Mrad2831_5762/Mrad2831_5763
					Mrad2831_6378/Mrad2831_6377
					Mrad2831_4020-autoinducer synthesis protein
	Methylobacterium sp. (strain 4-46)	None	None	None	M446_5462/M446_5461
	Methylobacterium sp. GXF4	None	None	None	mevR(WYO_5258)/mevI(WYO_5257)
					WYO_1983/WYO_1984
	Microvirga lotononidis	None	None	None	MicloDRAFT_00042790/MicloDRAFT_00042780
	Methylocystis sp. (strain SC2)	SC2p2_00510(traR) (Located on the plasmid)	Type IV secretory pathway protein, AvhB1	hypothetical protein	BN69_0856/BN69_0855
	Aquamicrobium defluvii	BG36_20330	LuxR family transcriptional regulator (no autoinducer binding domain)	hypothetical protein	None
		BG36_15895	conjugal transfer protein TraH	transcriptional regulator TraM
	Hoeflea phototrophica DFL-43	HPDFL43_02440	3-methylmercaptopropionyl-CoA ligase (DmdB)	Integrins alpha chain:ASPIC/UnbV	HPDFL43_14997/HPDFL43_14992
		HPDFL43_14177	Leucine-responsive regulatory protein, regulator for leucine (or lrp) regulon and high-affinity branched-chain amino acid transport system	hypothetical protein
		HPDFL43_13505	hypothetical protein	DNA primase
		HPDFL43_17306	Alcohol dehydrogenase	Pyruvate carboxyl transferase
	Mesorhizobium alhagi CCNWXJ12-2	MAXJ12_09286	LuxR superfamily transcripional regulator	LysR family regulator	MAXJ12_23012/MAXJ12_23017
					MAXJ12_24432/MAXJ12_24437
					MAXJ12_30967/MAXJ12_30972
	Mesorhizobium amorphae CCNWGS0123	MEA186_22036	LuxR family transcriptional regulator	hypothetical protein	MEA186_02639/MEA186_02634
		MEA186_30312	hypothetical protein	hypothetical protein
		MEA186_34324	proline iminopeptidase protein	proline iminopeptidase protein
		MEA186_31731	3-oxoacyl-(acyl-carrier-protein) synthase	Transposase
	Mesorhizobium australicum (strain LMG 24608 / HAMBI 3006 / WSM2073)	Mesau_02030	LuxR family transcriptional regulator	hypothetical protein	Mesau_00936/Mesau_00935
		Mesau_05727	Aminotransferase	Uncharacterized conserved protein	Mesau_06036/Mesau_06035
		Mesau_05849	pseudogene, 1-aminocyclopropane-1-carboxylate deaminase	hypothetical protein	Mesau_05624/Mesau_05623
					Mesau_02675/Mesau_02680
	Mesorhizobium ciceri bv. biserrulae (strain HAMBI 2942 / LMG 23838 / WSM1271)	Mesci_1968	LuxR family protein	hypothetical protein	Mesci_2554/Mesci_2559
		Mesci_5676	Aminotransferase	hypothetical protein	Mesci_5573/Mesci_5572
		Mesci_5799	Pseudogene	Pseudogene	Mesci_5995/Mesci_5994
	Mesorhizobium metallidurans STM 2683	MESS2_800020	Extracellular solute-binding protein, family 5	Proline iminopeptidase	MESS2_1030022/MESS2_1030021
					MESS2_300076/MESS2_300077
					MESS2_1670015/MESS2_1670014
	Mesorhizobium opportunistum (strain LMG 24607 / HAMBI 3007 / WSM2075)	Mesop_6256	Aminotransferase	putative uncharacterised conserved protein	Mesop_6155/Mesop_6154
		Mesop_6376	1-aminocyclopropane-1-carboxylate deaminase	Pseudogene	Mesop_2734/Mesop_2739
					Mesop_6642/Mesop_6641
					Mesop_2830/Mesop_2831
	Mesorhizobium sp. STM 4661	MESS4_50017	putative Exodeoxyribonuclease 7 small subunit	hypothetical protein (transposase)	MESS4_330001/MESS4_330002
		MESS4_830145	Extracellular solute-binding protein, family 5	proline imino peptidase	MESS4_520060/MESS4_520061
					MESS4_70035/MESS4_70034
					mrtR/mrtI
	Rhizobium loti (strain MAFF303099)	mll8752	hypothetical protein	Transposase	mlr6102/mlr6103(traI)
		mlr2897	LuxR transcriptional regulator	Hypothetical protein	mlr5637/mlr5638
					mlr9544/mlr9546
	Nitratireductor indicus C115	NA8A_03295	ABC transporter ATP-binding protein	hypothetical protein	None
	Nitratireductor pacificus pht-3B	NA2_05126	family 3 extracellular solute-binding protein	glycosyl transferase family protein	None
		NA2_02034	nitrilase/cyanide hydratase and apolipoprotein N-acyltransferase	binding-protein-dependent transport system inner membrane protein
		NA2_02399	phasin	hypothetical protein
	Phyllobacterium sp. YR531	PMI41_00546	hypothetical protein	Prokaryotic Transcriptional repressor TraM	None
		PMI41_00262	Protein of unknown function (DUF3095)	hypothetical protein
		PMI41_00575	TraH_2	hypothetical protein
	Agrobacterium albertimagni AOL15	QWE_08511	AsnC family transcriptional regulator	hypothetical protein	QWE_22786/QWE_22781
		QWE_09296	hypothetical protein	hypothetical protein	QWE_00245/QWE_00190
		QWE_00395	extracellular solute-binding protein family 1	conjugal transfer protein TraB
		QWE_01980	cyclic beta-1,2-glucan ABC transporter	pyruvate carboxylase
		QWE_13168	Gluconolactonase	mrp protein
	Agrobacterium rhizogenes	None	None	None	Rcorf83/Rcorf95
					Riorf119/Riorf131
	Agrobacterium sp. (strain H13-3)	AGROH133_09107	Beta-(1-->2)glucan export ATP-binding/permease protein	Pyruvate carboxyl transferase	None
		AGROH133_04270	D-galactonate regulator, IclR family	Nitrate ABC transporter, nitrate-binding protein
		AGROH133_07927	Putative inner membrane protein	hypothetical protein
		AGROH133_14590 (in the plasmid)	chaperone protein HchA	diguanylate cyclase
	Agrobacterium tumefaciens (strain C58 / ATCC 33970)	Atu2285(atxR)	Putative inner membrane protein	Hypothetical protein	Atu6134 (traR)/Atu6042(traI)
		Atu2727	cyclic beta-1,2-glucan ABC transporter(chvA)	pyruvate carboxylase
		Atu0707	IclR family transcriptional regulator	ABC transporter, nucleotide binding/ATPase protein
	Agrobacterium radiobacter (strain K84 / ATCC BAA-868)	Arad_3263(arxR)	hypothetical protein	hypothetical protein	Arad_8457/Arad_8456
		Arad_1107	D-galactonate regulator, IclR family	Mrp protein	Arad_14146(traR)/Arad_14182(traI)
		Arad_4719	beta-1,2-glucan ABC transporter, ATP-binding protein	pyruvate carboxylase protein
		Arad_8442	proline iminopeptidase protein	proline iminopeptidase protein
		Arad_14110 (traR')	Sucrose phosphorylase-like protein	hypothetical protein
	Agrobacterium radiobacter DSM 30147	L902_36025	Pseudo gene	Hypothetical protein	L902_01890/L902_01885
		L902_35285	Pseudo gene	Type VI secretion protein
		L902_03395	Hypothetical protein	Hypothetical protein
		L902_03385	Regulator	Hypothetical protein
		L902_23955	IclR family transcriptional regulator	ABC transporter permease
		L902_01530	Hypothetical protein	Hypothetical protein
	Agrobacterium tumefaciens F2	Agau_C100829(sdiA)	hypothetical protein, Agau_C100831-cyclic beta-1,2-glucan ABC transporter	pyruvate carboxylase	Agau_P200146/P200082 (located on plasmid)
		Agau_C102090	IclR family transcriptional regulator	ABC transporter, nucleotide binding/ATPase protein	Agau_P200476(sdiA)/Agau_P200550 (located on plasmid)
		Agau_C200056(sdiA)	hypothetical protein	hypothetical protein
		Agau_P200587(CinR)	hypothetical protein	hypothetical protein
	Agrobacterium tumefaciens LBA4213 (Ach5)	X971_2241	inner membrane protein	pseudoazurin precursor	X971_5344(traR)/X971_5407(traI)
		X971_0678	IclR family D-galactonate regulator	nitrate ABC transporter nitrate-binding protein
	Agrobacterium tumefaciens str. Cherry 2E-2-2	H009_24756	putative membrane protein	hypothetical protein	H009_14658/H009_14653
		H009_20796(traR)	sucrose phosphorylase	hypothetical protein
		H009_20906	hypothetical protein	SmoC-like regulatory protein
		H009_20991	LecE	Transcriptional regulator (LysR family)
		H009_04639	cyclic beta-1,2-glucan ABC transporter	pyruvate carboxylase
		H009_08181	Pectin degradation repressor protein kdgR	Nitrate transport protein
	Agrobacterium vitis (strain S4 / ATCC BAA-846)	Avi_0918(avhR)	calcium-binding protein regucalcin	ABC transporter nucleotide binding/ATPase protein	Avi_1890(avsR)/Avi_1889(avsI)
		Avi_4374(aviR)	beta (1-->2) glucan export ATP-binding protein	pyruvate carboxylase	Avi_8300(traR)/Avi_8335(traI)
		Avi_3273(avxR)	Formate Tetrahydrofolate Ligase Protein	PAS domain containing protein	Avi_9665/Avi_9666
		Avi_2957	histidinol-phosphate aminotransferase	transcriptional regulator HTH family	Avi_9195(traR)/Avi_9270(traI)
		Avi_5725	diaminopimelate decarboxylase	Glycosyl transferase
		Avi_8140(traR)	alanine racemase	traM
	Rhizobium etli (strain CFN 42 / ATCC 51251)	RHE_PB00089	proline iminopeptidase protein	proline iminopeptidase protein	RHE_PF00439(raiR)/RHE_PF00440(raiI)
		RHE_CH00857	IclR family transcriptional regulator	hypothetical protein	RHE_PA00167(traR)/RHE_PA00179 (traI)
		RHE_PA00168(cinRa)	trbI	traR	RHE_CH02915(cinRch)/RHE_CH02916(cinI)
		RHE_CH04001	cyclic beta-1,2-glucan ABC transporter	pyruvate carboxylase
		RHE_CH03080	hypothetical protein	hypothetical protein
		RHE_CH01160	methyl-accepting chemotaxis protein	putative sensory box/GGDEF family protein
	Rhizobium etli (strain CIAT 652)	RHECIAT_CH0004289	hypothetical protein	pyruvate carboxylase	RHECIAT_CH0003072(cinR)/RHECIAT_CH0003073(cinI)
		RHECIAT_CH0000947	hypothetical protein	hypothetical protein	RHECIAT_PC0000662(raiR)/RHECIAT_PC0000663(raiI)
		RHECIAT_CH0001245	methyl-accepting chemotaxis protein	putative sensory box/GGDEF family protein
		RHECIAT_PC0000237	proline iminopeptidase protein	proline iminopeptidase protein
		RHECIAT_CH0003239	Periplasmic protease	hypothetical protein
	Rhizobium etli CNPAF512	RHECNPAF_3970017	hypothetical protein	putative sensory box/GGDEF family protein	RHECNPAF_17000110/RHECNPAF_17000112
		RHECNPAF_520026	proline iminopeptidase	Pseudogene
		RHECNPAF_950011	putative transcriptional regulator protein, IclR family	Hypothetical protein
		RHECNPAF_5600026	hypothetical protein	hypothetical protein
		RHECNPAF_6002	hypothetical protein	Pseudogene
	Rhizobium etli bv. mimosae str. Mim1	REMIM1_CH00870	IclR family transcriptional regulator protein	hypothetical protein	REMIM1_CH02967/REMIM1_CH02968
		REMIM1_CH01164	methyl-accepting chemotaxis protein	GGDEF/EAL domain-containing protein	REMIM1_PF00438/REMIM1_PF00437
		REMIM1_CH04098	beta-(1-->2)glucan export ATP-binding/permease protein NdvA	pyruvate carboxylase	REMIM1_PC00250(traR)/REMIM1_PC00262(traI)
		REMIM1_PA00100	proline iminopeptidase 3	L-amino acid amidase
		REMIM1_PE00294	hypothetical protein	hypothetical protein
		REMIM1_CH03128	Clp protease-like protein	hypothetical protein
	Rhizobium freirei PRF 81	RHSP_05028	mobile element protein	diaminobutyrate--pyruvate aminotransferase	RHSP_74095(traR)/RHSP_74286 (traI)
		RHSP_64182	hypothetical protein	Diguanylate phosphodiesterase, putative	RHSP_19078(traR)/RHSP_82234
		RHSP_03076	transcription regulator protein	Mrp protein
		RHSP_50111	hypothetical protein	putative transmembrane protein
		RHSP_83306	beta-1,2-glucan ABC transporter, ATP-binding protein	Pyruvate carboxylase
	Rhizobium grahamii CCGE 502	RGCCGE502_21795	dehydrogenase	alpha/beta hydrolase	RGCCGE502_16805/RGCCGE502_16810
		RGCCGE502_24060	cyclic beta-1,2-glucan ABC transporter	Pyruvate carboxylase	RGCCGE502_33821/RGCCGE502_33766 (traI)
		RGCCGE502_04255	IclR family transcriptional regulator	ATPases involved in partitionng
		RGCCGE502_14610	hypothetical protein	hypothetical protein
		RGCCGE502_13714	Predicted membrane protein	Uncharacterized hypothetical protein
	Rhizobium leguminosarum bv. trifolii (strain WSM1325)	Rleg_3087	Pseudogene	PAS fold-3 domain protein	Rleg_2928/Rleg_2929
		Rleg_6196	proline-specific peptidase	proline-specific peptidase	Rleg_5493/Rleg_5481
		Rleg_4168	glucan exporter ATP-binding protein	pyruvate carboxylase
		Rleg_0548	transcriptional regulator, IclR family	protein of unknown function DUF59
	Rhizobium leguminosarum bv. trifolii (strain WSM2304)	Rleg2_1709	protein of unknown function DUF214	hemolysin-type calcium-binding region	Rleg2_2667/Rleg2_2668
		Rleg2_0505	transcriptional regulator, IclR family	protein of unknown function DUF59
		Rleg2_3840	cyclic beta-1,2-glucan ABC transporter	pyruvate carboxylase
		Rleg2_6376	proline-specific peptidase	proline-specific peptidase
		Rleg2_0797	diguanylate cyclase with PAS/PAC sensor	diguanylate cyclase/phosphodiesterase with PAS/PAC and GAF sensor(s)
		Rleg2_2818	hypothetical protein	PAS fold-3 domain protein
	Rhizobium leguminosarum bv. trifolii CB782	RLEG12_13900	IclR family transcriptional regulator	hypothetical protein	RLEG12_24440/RLEG12_24445
		RLEG12_25330	Predicted periplasmic protein	hyothetical protein	RLEG12_10475/RLEG12_10470 (plasmid)
		RLEG12_30795	ABC transporter	pyruvate carboxylase	RLEG12_00730/RLEG12_00720 (plasmid)
		RLEG12_06375 (located in the plasmid)	proline iminopeptidase	amino acid amidase	RLEG12_01095/RLEG12_00075
		RLEG12_07490	methyl-accepting chemotaxis protein	Peptidase
	Rhizobium leguminosarum bv. trifolii WSM1689	RLEG3_12900	IclR family transcriptional regulator	sodium:proton antiporter	RLEG3_25235/RLEG3_25240
		RLEG3_31800	ABC transporter	pyruvate carboxylase	RLEG3_02875/RLEG3_02880 (plasmid)
		RLEG3_26005	Predicted periplasmic protein	Diguanylate cyclase
		RLEG3_00085	proline iminopeptidase	amino acid amidase
	Rhizobium leguminosarum bv. trifolii WSM2012	Rleg10DRAFT_0144	PAS domain containing protein	putative dienelactone hydrolase(prolyl peptidase family)	Rleg10DRAFT_4093/Rleg10DRAFT_4092
		Rleg10DRAFT_0373	proline-specific peptidase2	proline-specific peptidase	Rleg10DRAFT_4225/Rleg10DRAFT_4223
		Rleg10DRAFT_2503	IclR helix-turn-helix domain; Bacterial transcriptional regulator	hypothetical protein
		Rleg10DRAFT_5984	putative periplasmic protein	Uncharacterized protein
		Rleg10DRAFT_4931	glucan exporter ATP-binding protein	pyruvate carboxylase
	Rhizobium leguminosarum bv. trifolii WSM2297	Rleg4DRAFT_1538	PAS domain containing protein	PAS domain S-box/diguanylate cyclase (GGDEF) domain-containing protein	Rleg4DRAFT_2003/Rleg4DRAFT_2004
		Rleg4DRAFT_5645	proline-specific peptidase	proline-specific peptidase	Rleg4DRAFT_2432/Rleg4DRAFT_2433
		Rleg4DRAFT_4512	IclR helix-turn-helix domain; Bacterial transcriptional regulator	ATPase involved in chromosome partitioning
		Rleg4DRAFT_2184	putative periplasmic protein	PAS domain containing protein
		Rleg4DRAFT_3474	glucan exporter ATP-binding protein	pyruvate carboxylase
	Rhizobium leguminosarum bv. trifolii WSM597	Rleg9DRAFT_6361	putative periplasmic protein	PAS domain containing protein	Rleg9DRAFT_6545/Rleg9DRAFT_6544
		Rleg9DRAFT_3877	glucan exporter ATP-binding protein	pyruvate carboxylase	Rleg9DRAFT_6205/Rleg9DRAFT_6204
		Rleg9DRAFT_0733	proline specific peptidase	proline specific peptidase
		Rleg9DRAFT_2535	PAS domain S-box/diguanylate cyclase (GGDEF) domain-containing protein	PAS domain S-box/diguanylate cyclase (GGDEF) domain-containing protein
		Rleg9DRAFT_2851	IclR helix-turn-helix domain; Bacterial transcriptional regulator	hypothetical protein
	Rhizobium leguminosarum bv. viciae (strain 3841)	pRL90180	proline imino peptidase (pip4)	proline imino peptidase (pip3)	RL3377(bisR)/RL3378
		RL0919	IclR helix-turn-helix domain; Bacterial transcriptional regulator	RL0920-putative ATP-binding mrp family protein	pRL100172(rhiR)/pRL100164(rhiI)
		RL4639(expR)	cyclic beta-1,2-glucan ABC transporter	RL4638-pyruvate carboxylase	pRL80131(traRp8)/pRL70091(traIp7)
		RL3528	hpothetical protein	RL3529-hypothetical protein
	Rhizobium leguminosarum bv. viciae WSM1455	Rleg5DRAFT_1362	5-aminolevulinic acid synthase	transposase	Rleg5DRAFT_3106/Rleg5DRAFT_3107
		Rleg5DRAFT_5474	IclR helix-turn-helix domain; Bacterial transcriptional regulator	ATPase involved in chromosome partitioning	Rleg5DRAFT_1506/Rleg5DRAFT_1518
		Rleg5DRAFT_0143	proline specific peptidase	proline specific peptidase	Rleg5DRAFT_1586/Rleg5DRAFT_1582
		Rleg5DRAFT_4397	glucan exporter ATP-binding protein	pyruvate carboxylase
		Rleg5DRAFT_3270	hypothetical protein	PAS domain containng protein
	Rhizobium lupini HPC(L)	C241_09301	cyclic beta-1,2-glucan ABC transporter	pyruvate carboxylase	None
		C241_17625	predicted membrane protein	hypothetical protein
		C241_18425	Pectin degradation repressor protein kdgR	Nitrate transport protein
	Rhizobium mesoamericanum STM3625	BN77_3577	conserved membrane hypothetical protein	conserved hypothetical protein	BN77_p10829/BN77_p10830
		BN77_1739	putative transcriptional regulator protein,IclR family	hypothetical protein	BN77_p2170021(traR)/BN77_p2170010(traI)
		BN77_3371	hypothetical protein	PAPS (adenosine 3'-phosphate 5'-phosphosulfate)3'(2'),5'-bisphosphate nucleotidase	BN77_p30070 (traR)/BN77_p30082(traI)
		BN77_0719(expR)	Beta-(1-->2)glucan export ATP-binding/permease protein ndvA	pyruvate carboxylase
		BN77_p10179	putative methyl-accepting chemotaxis protein (MCP) with multiple PAS domains	NADH-quinone oxidoreductase subunit N 2
	Rhizobium sp.	NT26_0437	SMP-30/Gluconolaconase/LRE domain protein	Protein mrp homolog	None
		NT26_2389	TonB-dependent hemoglobin/transferrin/lactoferrin family receptor	conserved protein of unknown function
		NT26_3615	Beta-(1-->2)glucan export ATP-binding/permease protein ndvA	pyruvate carboxylase
	Rhizobium sp. AP16	PMI03_01974	putative periplasmic protein	hypothetical protein	PMI03_04249/PMI03_04248
		PMI03_04925	IclR helix-turn-helix domain; Bacterial transcriptional regulator	ATPase involved in chromosome partitioning
		PMI03_04239	proline specific peptidase	proline specific peptidase
		PMI03_01923	glucan exporter ATP-binding protein	pyruvate carboxylase
	Rhizobium tropici CIAT 899	RTCIAT899_CH04115	transcriptional regulator IclR	ATP-binding protein	RTCIAT899_PA01050(traRa)/RTCIAT899_PA01110(traI)
		RTCIAT899_CH12990	hypothetical protein	hypothetical protein	RTCIAT899_PB02900(traRb)/ RTCIAT899_PB02960(traIb)
		RTCIAT899_PB01640	transposase	diaminobutyrate-pyruvate aminotransferase
		RTCIAT899_PC01395	proline iminopeptidase protein	proline iminopeptidase protein
		RTCIAT899_CH18110	cyclic beta-1,2-glucan exporter protein NdvA	pyruvate carboxylase
	Shinella zoogloeoides DD12	SHLA_60c000340	transcriptional activator protein AhyR/AsaR	protein mrp	SHLA_65c000270/SHLA_65c000150
		SHLA_60c000350 (ahyR)	putative IclR family transcriptional regulator	putative LuxR/GerE family transcriptional regulator
		SHLA_12c000210	hypothetical protein	tRNA-specific 2-thiouridylase MnmA
		SHLA_57c000050	beta-(1-->2)glucan export ATP-binding/permease protein NdvA	pyruvate carboxylase Pyc
		SHLA_33c000650	ABC-type dipeptide transport system periplasmic component	response regulator
	Ensifer adhaerens OV14	OV14_0805	glucan exporter ATP-binding protein	pyruvate carboxylase	OV14_3019/OV14_3020
		OV14_1652	periplasmic dipeptide ABC transport protein precursor DppA	extracelluar solute-binding protein, family 1	OV14_c0052(traR)/OV14_c0101(traI)
		OV14_1761	putative LuxR/GerE family transcriptional regulator	putative ATP-binding Mrp family protein
		OV14_1760	putative IclR family transcriptional regulator	putative LuxR/GerE family transcriptional regulator
		OV14_0184	hypothetical protein	5-methylaminomethyl-2-thiouridylate)-methyltransferase
	Rhizobium meliloti (strain 1021) (Ensifer meliloti)	R00648(SMc03016)visR	Transcriptional regulator of motility genes,LuxR family, visN	conserved hypothetical protein	SMc00170/SMc00168
		R03279(SMc03896)	Insertion sequence element ISRm1	pyruvate carboxylase
		R00828(SMc00878)	putative transcription regulator protein	putative transcription regulator protein
		R02815(SMc04032)	putative proline iminopeptidase protein, pip3	putative proline iminopeptidase protein, pip2
		R02714(SMc00658)	hypothetical protein	tRNA-specific 2-thiouridylase MnmA
		R00829(SMc00877)	putative transcription regulator protein	putative MRP protein homolog ATP-binding
	Sinorhizobium meliloti (strain AK83)	Sinme_0342	transcriptional regulator, LuxR family	hypothetical protein	Sinme_1744/Sinme_1745
		Sinme_2769	protein of unknown function DUF1153	tRNA-specific 2-thiouridylase mnmA	Sinme_5833/Sinme_5835
		Sinme_0535	transcriptional regulator, IclR family	transcriptional regulator, LuxR family
		Sinme_0536	transcriptional regulator, LuxR family	ATPase-like, ParA/MinD
		Sinme_2870	proline-specific peptidase	proline-specific peptidase
		Sinme_3274	glucan exporter ATP-binding protein	pyruvate carboxylase
	Sinorhizobium meliloti (strain BL225C)	SinmeB_0255	transcriptional regulator, LuxR family	hypothetical protein	SinmeB_1588/SinmeB_1589
		SinmeB_2545	protein of unknown function DUF1153	tRNA-specific 2-thiouridylase mnmA
		SinmeB_6123	Pseudogene	Pseudogene
		SinmeB_0440	transcriptional regulator, IclR family	transcriptional regulator, LuxR family
		SinmeB_0441	transcriptional regulator, LuxR family	ATPase-like, ParA/MinD
		SinmeB_2646	proline-specific peptidase	proline-specific peptidase
		SinmeB_3049	SinmeB_3050-glucan exporter ATP-binding protein	pyruvate carboxylase
		SinmeB_6117	SinmeB_6118-hypothetical protein	hypothetical protein
	Sinorhizobium meliloti (strain SM11)	orf153(traR)	hypothetical protein	traM	SM11_chr1561 /SM11_chr1560
		SM11_chr3405	cyclic beta-1,2-glucan ABC transporter	Pyruvate carboxylase	SM11_pC1000(luxR)/SM11_pC1008 (traI)
		SM11_chr0482	putative transcriptional regulator	putative MRP protein ATP-binding protein
		SM11_chr2877	hypothetical protein	tRNA (5-methylaminomethyl-2-thiouridylate) methyltransferase
		SM11_chr0284(visR)	Sugar phosphate permease	hypothetical protein
		SM11_chr2981	putative proline iminopeptidase protein(pip3)	putative proline iminopeptidase protein(pip2)
		SM11_chr0481	transcriptional regulator	putative transcriptinal regulator
	Sinorhizobium meliloti 2011	SM2011_c00877	putative transcriptional regulator	putative MRP related protein	SM2011_c00170(sinR)/SM2011_c00168(sinI)
		SM2011_c00878	putative transcriptional regulator	putative transcriptional regulator
		SM2011_c04032(nesR)	Putative proline iminopeptidase	Putative proline iminopeptidase
		SM2011_c03896	Transposase for insertion sequence element ISRm1	Pyruvate carboxylase
		SM2011_c03016(visR)	Transcriptional regulator of motility genes,LuxR family	hypothetical protein
		SM2011_c00658	hypothetical protein	Putative tRNA 5-methylaminomethyl-2-thiouridylate-methyltransferase
	Sinorhizobium meliloti CCNWSX0020	SM0020_08873	hypothetical protein	tRNA-specific 2-thiouridylase MnmA	SM0020_26721/SM0020_26716
		SM0020_16036	LuxR family transcriptional regulator	hypothetical protein
		SM0020_25656	LuxR family transcriptional regulator	ParA/MinD ATPase-like protein
		SM0020_25661	IclR family transcriptional regulator	LuxR family transcriptional regulator
		SM0020_29265	cyclic beta-1,2-glucan ABC transporter	pyruvate carboxylase
	Sinorhizobium meliloti GR4	C770_GR4Chr0826	DNA-binding HTH domain-containing protein	ATPases involved in chromosome partitioning	C770_GR4Chr1893/C770_GR4Chr1894
		C770_GR4Chr0637	DNA-binding HTH domain-containing protein	hypothetical protein
		C770_GR4Chr0825	Transcriptional regulator	DNA-binding HTH domain-containing protein
		C770_GR4Chr2942	proline-specific peptidase	proline-specific peptidase
		C770_GR4Chr2838	Protein of unknown function (DUF1153)	tRNA (5-methylaminomethyl-2-thiouridylate)-methyltransferase
	Sinorhizobium meliloti RU11/001	SMRU11_pSmeRU11d_0770(luxR)	transcriptional regulator, LysR family	transposase	SMRU11_1655(SinR)/SMRU11_1656 (SinI)
		SMRU11_pSmeRU11c_0120(traR)	putative transmembrane protein	transcriptional repressor, traM
		SMRU11_0499	putative transcriptional regulator	mrp
		SMRU11_0311(visR)	Sugar phosphate permease	hypothetical protein
		SMRU11_0498	putative transcriptional regulator	putative transcriptional regulator
		SMRU11_2830	pip3	putative proline iminopeptidase protein
		SMRU11_2728(rhiR)	hypothetical protein	5-methylaminomethyl-2-thiouridylate)-methyltransferase
		SMRU11_3240 (expR)	cyclic beta-1,2-glucan ABC transporter	pyruvate carboxylase
	Sinorhizobium meliloti Rm41	BN406_02571	hypothetical protein	tRNA-specific 2-thiouridylase MnmA	BN406_01571/BN406_01572
		BN406_00483	transcription regulator protein	Protein mrp homolog	BN406_04332/BN406_04334(traI)
		BN406_02673	proline iminopeptidase	L-amino acid amidase	BN406_06832(traR)/BN406_06844(traI)
		BN406_03078	Beta-(1-->2)glucan export ATP-binding/permease protein NdvA	Pyruvate carboxylase
		BN406_00482	putative transcriptional regulator	LuxR family transcriptional regulator
		BN406_00264	visN	hypothetical protein
		BN406_04338(luxR)	hypothetical protein	unnamed protein product
	Rhizobium sp. (strain NGR234)	NGR_a01900(bxrH)	putative transposase of undefined mobile element	diaminobutyrate--2-oxoglutarate transaminase BxrG	NGR_c16890/NGR_c16900
		NGR_c32870	glucan exporter ATP-binding protein	pyruvate carboxylase	NGR_a04090(traR)/NGR_a04220(traI)
		NGR_c04400	putative LuxR/GerE family transcriptional regulator	putative ATP-binding Mrp family protein
		NGR_c04390	putative IclR family transcriptional regulator	putative LuxR/GerE family transcriptional regulator
	Sinorhizobium fredii GR64	None	None	None	SFGR64A_00151(traR)/SFGR64A_00163(traI)
	Parvibaculum lavamentivorans (strain DS-1 / DSM 13023 / NCIMB 13966)	Plav_1672	FAD dependent oxidoreductase	DSBA oxidoreductase	None
	Xanthobacter autotrophicus (strain ATCC BAA-1158 / Py2)	Xaut_4889	hypothetical protein	hypothetical protein	None
Rhodobacterales	Hyphomonas jannaschiana VP2	HJA_07417	tRNA-specific 2-thiouridylase MnmA	hypothetical protein	HJA_03486/HJA_03491
		HJA_06032	acyl-CoA dehydrogenase domain-containing protein	2-amino-3-ketobutyrate coenzyme A ligase
	Hyphomonas oceanitis SCH89	None	None	None	HOC_19391/HOC_19386
					HOC_13339/HOC_13344
	Hyphomonas sp. 22II1-22F38	HY36_15090	Bacterial sensor protein	Peptidase	None
	Hyphomonas sp. CY54-11-8	HY17_12200	hypothetical protein	thiouridylase	HY17_07770/HY17_07765
					HY17_16240/HY17_16235
	Hyphomonas sp. L-53-1-40	L53_02540	hypothetical protein	Autoinducer binding domain containing protein	None
	Oceanicaulis sp. HTCC2633	OA2633_13250	DNA polymerase III subunits gamma and tau	hypothetical protein	None
	Actibacterium mucosum KCTC 23349	ACMU_07720	hypothetical protein-RTX toxin	elongation factor Ts	ACMU_16955/ACMU_16950
					ACMU_12055/ACMU_12050
	Ahrensia sp. R2A130	R2A130_1734	PAS fold-3 domain protein	conserved hypothetical protein	None
	Celeribacter baekdonensis B30	B30_05667	hypothetical protein	GntR family transcriptional regulator	B30_19871/B30_19876
		B30_08158	Demethylmenaquinone methyltransferase	4-hydroxy-2-oxovalerate aldolase	B30_16888/B30_16883
		B30_05936	AsnC/Lrp family transcriptional regulator	elongation factor Ts
	Citreicella sp. 357	C357_03001	3-dehydroquinate dehydratase	elongation factor Ts	C357_10197/C357_10192
	Citreicella sp. SE45	CSE45_1818	3-dehydroquinate dehydratase, type II	translation elongation factor Ts	CSE45_4055/CSE45_4054
		CSE45_4969	penicillin acylase 2	proline iminopeptidase
	Defluviimonas sp. 20V17	U879_01715	hypothetical protein	elongation factor Ts	U879_04665/U879_04670
	Jannaschia sp. (strain CCS1)	Jann_3193	hypothetical protein(serine hydratase)	hypothetical protein	Jann_0619/Jann_0620
		Jann_2301	3-dehydroquinate dehydratase	hypothetical protein
		Jann_2033	hypothetical protein	TetR family transcriptional regulator
		Jann_1153	NADH dehydrogenase subunit A	hypothetical protein
	Ketogulonicigenium vulgare (strain WSH-001)	None	None	None	KVU_2076/KVU_2075
	Ketogulonicigenium vulgare (strain Y25)	None	None	None	EIO_2569/EIO_2568
	Labrenzia aggregata IAM 12614	SIAM614_29966	von Willebrand factor type A domain protein	hypothetical protein	None
	Labrenzia sp. C1B10	Q669_25255	hypothetical protein	hypothetical protein(LemA protein family)	None
	Labrenzia sp. C1B70	Q675_16600	hypothetical protein	hypothetical protein(LemA protein family)None
	Leisingera methylohalidivorans DSM 14336	METH_08830	3-dehydroquinate dehydratase	elongation factor Ts	METH_03420/METH_03425
					METH_11170/METH_11165
	Loktanella cinnabarina LL-001	MBE-LCI_1023	DNA-binding HTH domain-containing proteins	adenylosuccinate lyase	None
		MBE-LCI_2444	phosphate regulon transcriptional regulatoryprotein phoB	translation elongation factor Ts
		MBE-LCI_1285	LSU ribosomal protein L17p	Holliday junction DNA helicase
	Loktanella hongkongensis DSM 17492	Lokhon_00130	Short-chain dehydrogenase/reductase SDR precursor	Hypothetical protein	None
		Lokhon_00081	response regulator receiver protein	Cysteine desulfurase
		Lokhon_01712	Flagellar motor switch protein FliG	Adenylosuccinate lyase
		Lokhon_01962	Phosphate regulon transcriptional regulatory protein PhoB (SphR)	hypothetical protein
		Lokhon_00436	LSU ribosomal protein L17p	Holliday junction DNA helicase
	Loktanella vestfoldensis SKA53	None	None	None	SKA53_05835/SKA53_05830
	Maritimibacter alkaliphilus HTCC2654	RB2654_03619	Phosphate regulon transcriptional regulatory protein PhoB (SphR)	Translation elongation factor Ts	RB2654_20053/RB2654_20048
					RB2654_09024/RB2654_09014
	Oceanicola batsensis HTCC2597	OB2597_03302	Transposase	DNA-3-methyladenine glycosylase	None
	Oceanicola granulosus HTCC2516	OG2516_08027	Acyltransferase family protein associated with ethylmalonyl-CoA pathway	RecD-like DNA helicase	OG2516_02289/OG2516_02294
	Oceaniovalibus guishaninsula JLT2003	OCGS_0013	hypothetical protein	aspartate kinase	OCGS_2460/OCGS_2461
	Octadecabacter antarcticus 307	None	None	None	OAN307_c21800 /OAN307_c21810
					OAN307_c41330/OAN307_c41320
	Octadecabacter arcticus 238	OA238_c10450	putative transcriptional regulator interrupted by point mutation	putative IS630 family transposase	None
		OA238_c19610	IS256 family transposase	elongation factor Ts
	Paracoccus aminophilus JCM 7686	JCM7686_pAMI8p069	hypothetical protein	hypothetical protein	JCM7686_2126/JCM7686_2125
		JCM7686_1285	cytidylate kinase	elongation factor EF-Ts	JCM7686_3182/JCM7686_3181
	Paracoccus denitrificans (strain Pd 1222)	Pden_3724	hypothetical protein	elongation factor Ts	Pden_0786/Pden_0787
	Pelagibaca bermudensis (strain JCM 13377 / KCTC 12554 / HTCC2601)	R2601_24964	3-dehydroquinate dehydratase II	Translation elongation factor Ts	None
		R2601_10664	hypothetical protein	RecD-like DNA helicase
		R2601_04318	hypothetical protein	hypothetical protein
	Pseudovibrio sp. (strain FO-BEG1)	PSE_4867	helicase domain protein	Pyruvate carboxylase	None
		PSE_1528	Patatin	Phosphoribosylglycinamide synthetase
	Pseudovibrio sp. JE062	PJE062_237	Patatin	Phosphoribosylamine--glycine ligase	None
		PJE062_2072	Helicase conserved C-terminal domain protein	Pyruvate carboxylase
	Rhodobacter capsulatus (strain ATCC BAA-309 / NBRC 16581 / SB1003)	RCAP_rcc01088	glutathione ABC transporter periplasmic glutathione-binding protein GsiB	prolyl aminopeptidase-2	RCAP_rcc00328/RCAP_rcc00329
		RCAP_rcc01823	hypothetical protein	translation elongation factor Ts
	Rhodobacter capsulatus B6	U716_08030	peptide ABC transporter substrate-binding protein	amino acid amidase	U716_07555/U716_07560
		U716_03985	hypothetical protein	elongation factor Ts
	Rhodobacter capsulatus DE442	U714_10370	hypothetical protein	elongation factor Ts	U714_02490/U714_02495
		U714_06660	peptide ABC transporter substrate-binding protein	amino acid amidase
	Rhodobacter capsulatus R121	U717_10525	hypothetical protein	elongation factor Ts	U717_02505/U717_02510
		U717_06840	peptide ABC transporter substrate-binding protein	amino acid amidase
	Rhodobacter capsulatus Y262	U715_10530	hypothetical protein	elongation factor Ts	U715_02490/U715_02495
		U715_06830	peptide ABC transporter substrate-binding protein	amino acid amidase
	Rhodobacter capsulatus YW1	U703_14760	peptide ABC transporter substrate-binding protein	amino acid amidase	U703_01110/U703_01105
		U703_04955	hypothetical protein	elongation factor Ts
	Rhodobacter capsulatus YW2	U713_05150	peptide ABC transporter substrate-binding protein	amino acid amidase	U713_06935/U713_06940
		U713_01325	hypothetical protein	elongation factor Ts
	Rhodobacter sp. AKP1	D516_3321	hypothetical protein	hypothetical protein	D516_1374/D516_1373
		D516_2364	hypothetical protein(acetyl transferase)	hypothetical protein
		D516_1375	DNA-binding HTH domain-containing protein	Transcriptional activator protein LuxR(autoinducer domain containing)
		D516_1129	LSU ribosomal protein L17p	Periplasmic serine protease, DO/DeqQ family
	Rhodobacter sp. CACIA14H1	None	None	None	Q27BPR15_05195/Q27BPR15_05200
					Q27BPR15_02775-Autoinducer synthesis protein
	Rhodobacter sp. SW2	Rsw2DRAFT_1081	FAD dependent oxidoreductase	translation elongation factor Ts	Rsw2DRAFT_3117/Rsw2DRAFT_3116
		Rsw2DRAFT_1453	L-serine dehydratase 1	hypothetical protein
	Rhodobacter sphaeroides (strain ATCC 17023 / 2.4.1 / NCIB 8253 / DSM 158)	RSP_7381	hypothetical protein	two component LuxR family transcriptional regulator	RSP_0122(cerR)/RSP_0123(cerI)
		RSP_3684(solR)	FemAB family protein	hypthetical protein
		RSP_3665	internalin	hypothetical protein
		RSP_1741	50S ribosomal protein L17	serine protease
		RSP_6096	transcriptional activator	LuxR family transcriptional regulator(cerR)
	Roseibacterium elongatum DSM 19469	roselon_02937	3-dehydroquinate dehydratase II	Translation elongation factor Ts	roselon_01585/roselon_01587
	Roseibium sp. TrichSKD4	TRICHSKD4_3529	von Willebrand factor, type A	membrane-bound lytic murein transglycosylase A	None
	Roseivivax halodurans JCM 10272	OCH239_03475	twin-arginine translocation pathway signal protein	elongation factor Ts	OCH239_22020/OCH239_22025
		OCH239_07795	thymidine kinase	ribosomal protein S12 methylthiotransferase	OCH239_17565/OCH239_17560
	Roseivivax isoporae LMG 25204	RISW2_23710	transposase IS30	elongation factor Ts	RISW2_07605/RISW2_07600
		RISW2_18405	thymidine kinase	rimO	RISW2_20005/RISW2_20000
	Roseivivax sp. 22II-s10s	ATO8_21206	hypothetical protein	glutathione-dependent formaldehyde-activating protein	ATO8_05861(RaiR)/ATO8_05866
		ATO8_14877	mechanosensitive ion channel MscS	rhodanese domain-containing protein	ATO8_01185/ATO8_01190
		ATO8_06626	thymidine kinase	rimO (ribosomal protein S12 methylthiotransferase)
		ATO8_00685	hypothetical protein	elongation factor Ts
	Roseobacter denitrificans (strain ATCC 33942 / OCh 114) (Erythrobacter sp. (strain OCh 114))	RD1_3967	MerR family transcriptional regulator	hypothetical protein	RD1_1638/RD1_1639
	Roseobacter sp. CCS2	RCCS2_00422	3-dehydroquinate dehydratase, type II	VCBS	RCCS2_02083/RCCS2_02078
	Roseobacter sp. SK209-2-6	RSK20926_18892	3-dehydroquinate dehydratase	Elongation factor Ts	RSK20926_22079/RSK20926_22084
		RSK20926_14289	putative manganese-dependent inorganic pyrophosphatase	HAD-superfamily subfamily IIA hydrolase	RSK20926_15126/RSK20926_15131
		RSK20926_03972	crotonyl-CoA reductase	helicase, ATP-dependent, putative
	Roseovarius sp. TM1035	RTM1035_08219	3-dehydroquinate dehydratase	elongation factor Ts	RTM1035_10475 /RTM1035_10485
	Rubellimicrobium mesophilum DSM 19309	Rumeso_04650	Sensor histidine kinase	Translation elongation factor Ts	Rumeso_04543/Rumeso_04544
		Rumeso_03420	DNA-binding protein response regulator KdpE	hypothetical protein	Rumeso_01325-has only autoinducer binding domain
		Rumeso_02263	hypothetical protein	Inner membrane protein YqiK
		Rumeso_01326	DNA-binding protein HTH domainprotein-containing protein	Adenylosuccinate lyase
	Rubellimicrobium thermophilum DSM 16684	None	None	None	ruthe_02464/ruthe_02465
					ruthe_00617/ruthe_00618
					ruthe_00616-has only autoinducer binding domain
	Ruegeria pomeroyi (strain ATCC 700808 / DSM 15171 / DSS-3)	SPO1974	3-dehydroquinate dehydratase	elongation factor Ts	SPO2286/SPO2287
		SPO1764	hypothetical protein	transcription antitermination factor NusB	SPO0371/SPO0372
		SPO1120	membrane protein	proS
	Ruegeria sp. (strain TM1040)	TM1040_1212	hypothetical protein	elongation factor Ts	None
		TM1040_3181	hypothetical protein	Predicted kinase
		TM1040_3102(psyR)	hypothetical protein	ATPase
		TM1040_3808	hypothetical protein	TrbL/VirB6 plasmid conjugal transfer protein
	Silicibacter sp. TrichCH4B	SCH4B_0463	crotonyl-CoA reductase	ATPase	SCH4B_4368/SCH4B_4367
		SCH4B_4179	dimethylmenaquinone methyltransferase	2,4-dihydroxyhept-2-ene-1,7-dioic acid aldolase
		SCH4B_4682	3-dehydroquinate dehydratase II	elongation factor Ts
	Sagittula stellata E-37	SSE37_08793	Putative permease often clustered with de novo purine synthesis	hypothetical protein	SSE37_11169/SSE37_11164
		SSE37_09048	Glyoxalase family protein	Imidazoleglycerol-phosphate dehydratase
		SSE37_06082	3-dehydroquinate dehydratase II	hypothetical protein
	Salipiger mucosus DSM 16094	Salmuc_01634	2,3-butanediol dehydrogenase, R-alcohol forming (R)- and (S)-acetoin-specific	hypothetical protein	Salmuc_03526/Salmuc_03527
		Salmuc_03047	Thymidine kinase	Ribosomal protein S12p Asp methylthiotransferase	Salmuc_04808/Salmuc_04809
		Salmuc_02228	3-dehydroquinate dehydratase II	Translation elongation factor Ts	Salmuc_04656/Salmuc_04657
	Sulfitobacter pontiacus 3SOLIMAR09	PM01_12065	MerR family transcriptional regulator	hypothetical protein	PM01_15510/PM01_15385
	Thalassobacter arenae DSM 19593	thalar_01687	3-dehydroquinate dehydratase II	Translation elongation factor Ts	thalar_00119/thalar_00118
	Rhodobacteraceae bacterium HIMB11	HIMB11_02005	Autoinducer binding domain	Translation elongation factor Ts	None
	Rhodobacteraceae bacterium HTCC2083	RB2083_1776	Glutaryl-CoA dehydrogenase	hypothetical protein	RB2083_3272/RB2083_3255
					RB2083_3265/RB2083_730
	Rhodobacteraceae bacterium KLH11	RKLH11_1390	3-dehydroquinate dehydratase, type II	translation elongation factor Ts	RKLH11_1559/RKLH11_2275
					RKLH11_1933/RKLH11_0260
	Rhodobacterales bacterium Y4I	RBY4I_896	3-dehydroquinate dehydratase II	Translation elongation factor Ts	RBY4I_1027/RBY4I_3464
					RBY4I_1689/RBY4I_3631
Rhodospirillales	Acetobacter tropicalis NBRC 101654	ATPR_3123	outer membrane siderophore receptor	Na+/H+ Antiporter NhaA	ATPR_2119/ATPR_2118
	Acidomonas methanolica NBRC 104435	Amme_122_012	hypothetical protein	Na+/H+ antiporter	None
	Gluconacetobacter diazotrophicus (strain ATCC 49037 / DSM 5601 / PAl5)	None	None	None	GDI2838 /GDI2836
	Gluconacetobacter sp. SXCC-1	SXCC_02151	UPF0176 protein	Subtilin transport ATP-binding protein spaT	None
	Gluconacetobacter hansenii ATCC 23769	GXY_00149	hypothetical protein	hypothetical protein	None
	Gluconacetobacter medellinensis (strain NBRC 3288 / BCRC 11682 / LMG 1693 / Kondo 51)	GLX_23410	hypothetical protein	transposase	None
		GLX_01750	hypothetical protein	sulfotransferase
		GLX_02590	hypothetical protein	ABC transporter ATP-binding protein
	Gluconacetobacter xylinus E25	H845_2765	hypothetical protein	hypothetical protein	None
	Azospirillum amazonense Y2	None	None	None	AZA_63403/AZA_90644
	Azospirillum sp. (strain B510)	None	None	None	AZL_a06030/AZL_a05890
	Magnetospira sp. QH-2	None	None	None	MGMAQ_0952/MGMAQ_0953
	Magnetospirillum gryphiswaldense MSR-1 v2	MGR_0394	HTH motif transcriptional regulator	Hemolysin activation/secretion protein	MGR_3552/MGR_3551
		MGR_3573	succinate-semialdehyde dehydrogenase	phenylacetate-coenzyme A ligase
	Magnetospirillum sp. SO-1	H261_15355	MFS transporter family transporter protein	LuxR family transcriptional regulator (likely truncated)	None
	Oceanibaculum indicum P24	None	None	None	P24_11757/P24_11762
	Rhodospirillum photometricum DSM 122	RSPPHO_00675	ErfK/YbiS/YcfS/YnhG	MscS Mechanosensitive ion channel	RSPPHO_02248/RSPPHO_02249
	Rhodospirillum rubrum (strain ATCC 11170 / NCIB 8255)	Rru_A2179	extracellular solute-binding protein	peptidase S33, tricorn interacting factor 1	Rru_A3395/Rru_A3396
		Rru_A1935	ErfK/YbiS/YcfS/YnhG	transcriptional regulator, TetR family
	Rhodospirillum rubrum F11	F11_09945	ErfK/YbiS/YcfS/YnhG	TetR family transcriptional regulator	F11_17400/F11_17405
		F11_11225	extracellular solute-binding protein	peptidase S33, tricorn interacting factor 1
	Thalassospira profundimaris WP0211	None	None	None	TH2_19979/TH2_19984
	Tistrella mobilis (strain KA081020-065)	None	None	None	TMO_c0697/TMO_c0698
Sphingomonadales	Erythrobacter sp. NAP1	NAP1_05005	hypothetical protein	Rod shape-determining protein RodA	None
	Erythrobacter sp. SD-21	ED21_25678	two component transcriptional regulator, LuxR family protein	Transposase and inactivated derivatives	None
		ED21_26303	Acetyl-CoA synthetase (ADP-forming) alpha and beta chains, putative	GCN5-related N-acetyltransferase
		ED21_25612	HD-GYP domain	Putative diguanylate cyclase/phosphodiesterase
	Blastomonas sp. CACIA14H2	Q27BB25_03740	hypothetical protein	hypothetical protein	None
	Novosphingobium lindaniclasticum LE124	None	None	None	L284_21210/L284_21205
	Novosphingobium pentaromativorans US6-1	None	None	None	NSU_2448/NSU_2447
	Novosphingobium resinovorum	BV97_01208	Lipase/esterase	Glutathione S-transferase-like protein	BV97_01927/BV97_01928
		BV97_01191	Transcriptional regulator, LuxR family	hypothetical protein	BV97_01186/BV97_01185
	Novosphingobium sp. AP12	None	None	None	PMI02_00995/PMI02_00996
	Novosphingobium sp. PP1Y	PP1Y_Mpl8746	hypothetical protein	transposase	PP1Y_Lpl250/PP1Y_Lpl262
					PP1Y_AT16467/PP1Y_AT16460
	Novosphingobium sp. Rr 2-17	None	None	None	WSK_3263/WSK_3264
	Novosphingobium tardaugens NBRC 16725	NT2_01_00030	hypothetical protein	AAA domain (dynein-related subfamily)	None
		NT2_06_03550	putative ABC transporter permease protein	hypothetical protein
	Sphingobium herbicidovorans NBRC 16415	BV98_01208	Lipase/esterase	Glutathione S-transferase-like protein	BV98_01927/BV98_01928
		BV98_01191	Transcriptional regulator, LuxR family	hypothetical protein	BV98_01186/BV98_01185
	Sphingobium sp. AP49	None	None	None	PMI04_04261/PMI04_04262
	Sphingobium sp. Ant17	None	None	None	BF95_02720/BF95_02725
	Sphingobium sp. C100	C100_12405	Transposase	Hypothetical protein	None
		C100_06420	Hypothetical protein	LuxR family regulator (truncated)
	Sphingomonas paucimobilis	BV96_02559	putative ABC transporter permease protein	hypothetical protein	BV96_04160/BV96_04159
					BV96_03275/BV96_03276
	Sphingomonas sanxanigenens DSM 19645 = NX02	None	None	None	NX02_19580/NX02_19575
	Sphingomonas sp. LH128	LH128_18569	hypothetical protein	hypothetical protein	LH128_02749/LH128_02744
		LH128_12198	GIY-YIG domain of uncharacterized hypothetical protein	Permeases of the drug/metabolite transporter (DMT) superfamily
	Sphingomonas sp. S17	SUS17_3924	tonB-dependent receptor family protein	DJ-1/PfpI family protein	None
	Sphingomonas wittichii (strain RW1 / DSM 6014 / JCM 10273	Swit_0175	RNA polymerase, sigma-24 subunit, ECF subfamily	Small protein B	Swit_5012/Swit_5027
		Swit_1997	hypothetical protein	acyl-CoA dehydrogenase domain protein
		Swit_4359	TonB-dependent receptor	hypothetical protein
	Sphingopyxis alaskensis (strain DSM 13593 / LMG 18877 / RB2256)	None	None	None	Sala_2588/Sala_2589
					Sala_2525/Sala_2526
	Sphingopyxis sp. MC1	None	None	None	EBMC1_01955/EBMC1_01950
Betaproteobacteria
Burkholderiales	Achromobacter xylosoxidans (strain A8)	AXYL_02587	bacterial regulatory helix-turn-helix protein	tRNA-Ala	None
	Advenella kashmirensis (strain DSM 17095 / LMG 22695 / WT001)	TKWG_15800	hypothetical protein	leucyl-tRNA synthetase, LptE (rare lipoprotein B)	None
	Advenella kashmirensis W13003	W822_21695	hypothetical protein	leucyl-tRNA synthetase	None
	Advenella mimigardefordensis DPN7	MIM_c14710	hypothetical protein	leucyl-tRNA synthetase	None
	Burkholderia caribensis MBA4	K788_003154	Serine/threonine protein kinase	OsmC/Ohr family protein	K788_007673/K788_0038570
	Burkholderia cenocepacia (strain ATCC BAA-245 / DSM 16553 / LMG 16656 / NCTC 13227 / J2315 / CF5610)	BCAM2058	LuxR superfamily regulatory protein	type III secretion system protein	BCAM0240/BCAM0239a
		BCAM2059	LuxR superfamily regulatory protein	putative divalent cation transporter	BCAM1868/BCAM1870
		BCAM0188	AraC family regulatory protein	putative 2-isopropylmalate synthase
	Burkholderia cenocepacia (strain AU 1054)	Bcen_4980	transcriptional regulator, AraC family	2-isopropylmalate synthase	Bcen_3643/Bcen_3641
		Bcen_3509	transcriptional regulator, LuxR family	type III secretion FHIPEP
		Bcen_3508	transcriptional regulator, LuxR family	natural resistance-associated macrophage protein
	Burkholderia cenocepacia (strain HI2424)	Bcen2424_3180	transcriptional regulator, AraC family	2-isopropylmalate synthase	Bcen2424_4724/Bcen2424_4726
		Bcen2424_4857	transcriptional regulator, LuxR family	type III secretion FHIPEP protein
		Bcen2424_4858	transcriptional regulator, LuxR family	natural resistance-associated macrophage protein
	Burkholderia cenocepacia (strain MC0-3)	Bcenmc03_4299	transcriptional regulator, AraC family	2-isopropylmalate synthase	Bcenmc03_4279/Bcenmc03_4280
		Bcenmc03_5426	transcriptional regulator, LuxR family	Mn2+ and Fe2+ transporters of the NRAMP family	Bcenmc03_5576/Bcenmc03_5574
		Bcenmc03_5427	transcriptional regulator, LuxR family	type III secretion FHIPEP protein
	Burkholderia cenocepacia BC7	BURCENBC7_AP4042	3-oxoacyl-[acyl-carrier-protein (ACP)] synthaseIII	hypothetical protein	BURCENBC7_AP2323/BURCENBC7_AP2321
		BURCENBC7_AP5155	autoinducer-binding domain protein	type III secretion protein, HrcV family
		BURCENBC7_AP4101	DNA-binding helix-turn-helix protein	2-isopropylmalate synthase
		BURCENBC7_AP5154	autoinducer-binding domain protein	natural resistance-associated macrophage protein
	Burkholderia cenocepacia H111	I35_0528	transcriptional regulator, AraC family	2-isopropylmalate synthase	I35_4202/I35_4200
		I35_5895	putative transcriptional regulator of trehalose utilization, LuxR family	Manganese transport protein MntH
		I35_5894	putative transcriptional regulator of trehalose utilization, LuxR family	Type III secretion inner membrane channel protein (LcrD,HrcV,EscV,SsaV)
	Burkholderia cenocepacia K56-2Valvano	BURCENK562V_C4196	autoinducer-binding domain protein	natural resistance-associated macrophage protein	BURCENK562V_C4004/BURCENK562V_C4006
		BURCENK562V_C5352	3-oxoacyl-[acyl-carrier-protein (ACP)] synthase III	hypothetical protein
		BURCENK562V_C4195	autoinducer-binding domain protein	type III secretion protein, HrcV family
		BURCENK562V_C5291	DNA-binding helix-turn-helix protein	2-isopropylmalate synthase
	Burkholderia cenocepacia KC-01	P355_3669	putative transcriptional regulator of trehalose utilization, LuxR family	Manganese transport protein MntH	None
		P355_3670	putative transcriptional regulator of trehalose utilization, LuxR family	Type III secretion inner membrane channel protein (LcrD,HrcV,EscV,SsaV)
	Burkholderia cenocepacia PC184	BCPG_04200	Bacterial regulatory helix-turn-helix proteins, AraC family	2-isopropylmalate synthase	None
		BCPG_05076	regulatory protein, LuxR	Natural resistance-associated macrophage protein
		BCPG_05077	regulatory protein, LuxR	type III secretion FHIPEP
	Burkholderia cepacia GG4	GEM_3616	transcriptional regulator, LuxR family	type III secretion FHIPEP protein; frameshift"/pseudo	GEM_3751/GEM_3749
		GEM_3615	transcriptional regulator, LuxR family	Manganese transport protein MntH
	Burkholderia dolosa PC543	BDSB_21430	LuxR family transcriptional regulator	type III secretion protein	BDSB_20715/BDSB_20725
		BDSB_21435	LuxR family transcriptional regulator	Natural resistance-associated macrophage protein	BDSB_20870/BDSB_20865
	Burkholderia multivorans (strain ATCC 17616 / 249)	Bmul_3737	transcriptional regulator, LuxR family	natural resistance-associated macrophage protein	Bmul_3971/Bmul_3969
		Bmul_3738	transcriptional regulator, LuxR family	type III secretion FHIPEP protein
	Burkholderia multivorans ATCC BAA-247	BURMUCF1_A0349	autoinducer-binding domain protein	hypothetical protein	bspR, BURMUCF1_A0542/bpsI, BURMUCF1_A0540
		BURMUCF1_A0348	autoinducer-binding domain protein	natural resistance-associated macrophage
	Burkholderia multivorans CF2	BURMUCF2_A0351	autoinducer-binding domain protein	hypothetical protein	bspR, BURMUCF2_A0516/bpsI, BURMUCF2_A0514
		BURMUCF2_A0350	autoinducer-binding domain protein	natural resistance-associated macrophage protein
	Burkholderia multivorans CGD1	BURMUCGD1_3924	autoinducer-binding transcriptional regulator	natural resistance-associated macrophage protein	bpsR, BURMUCGD1_4094/BURMUCGD1_4092
		BURMUCGD1_3925	transcriptional regulator, LuxR family	conserved hypothetical protein
	Burkholderia multivorans CGD2	BURMUCGD2_4477	conserved hypothetical protein	putative magnesium transporter	None
		BURMUCGD2_4272	autoinducer-binding transcriptional regulator, LuxR family	natural resistance-associated macrophage protein
		BURMUCGD2_4273	transcriptional regulator, LuxR family	hypersensitivity response secretion protein HrcV
	Burkholderia multivorans CGD2M	BURMUCGD2M_4465	conserved hypothetical protein	putative magnesium transporter	None
		BURMUCGD2M_4261	autoinducer-binding transcriptional regulator, LuxR family	Natural resistance-associated macrophage protein
		BURMUCGD2M_4262	transcriptional regulator, LuxR family	hypersensitivity response secretion protein HrcV
	Burkholderia sp. (strain 383)	Bcep18194_B0857	transcriptional regulator, LuxR family	Asparagine synthase, glutamine-hydrolyzing	Bcep18194_B1052/Bcep18194_B1050
		Bcep18194_B0856	transcriptional regulator, LuxR family	Mn2+ and Fe2+ transporters of the NRAMP family
	Burkholderia vietnamiensis AU4i	L810_3129	putative transcriptional regulator of trehalose utilization, LuxR family	Asparagine synthetase	L810_2263/L810_2261
		L810_3130	putative transcriptional regulator of trehalose utilization, LuxR family	Manganese transport protein MntH
	Burkholderia gladioli (strain BSR3)	bgla_1g16270	Sodium:dicarboxylate symporter	hypothetical protein	bgla_2g11070/bgla_2g11050
		bgla_2g03080	hypothetical protein	Amino acid adenylation domain protein	bgla_1p1760/bgla_1p1740
		bgla_1p0580	Thioesterase	FAD binding domain; Region
		bgla_1p0680	diguanylate cyclase/phosphodiesterase	Fatty acyl-AMP ligase
		bgla_3p0790	hypothetical protein	hypothetical protein
	Burkholderia glumae (strain BGR1)	bglu_1g22700	Sodium:dicarboxylate symporter	putative penicillin amidase	bglu_2g14470/bglu_2g14490
		bglu_1g10680	Iron-sulfur cluster-binding protein, Rieske family	Pyruvate dehydrogenase (lipoamide)
		bglu_1g16610	alpha/beta hydrolase fold protein	Hypothetical protein
		bglu_1g17030	pseudogene	alpha/beta hydrolase family protein
		bglu_2g19400	Sterol desaturase	CAIB/BAIF family protein CoA transferase
		bglu_2g02680	dihydrolipoamide dehydrogenase	amino acid adenylation domain-containing protein
		bglu_3p0460	Nitrilases, cyanide hydratase	Rhs family protein
	Burkholderia graminis C4D1M	BgramDRAFT_2595	transcriptional regulator, AraC family	ABC-2 type transporter	BgramDRAFT_3087/BgramDRAFT_3089
					BgramDRAFT_4128/BgramDRAFT_4129
	Burkholderia phenoliruptrix BR3459a	BUPH_05907	AraC family transcriptional regulator	ABC-2 type transport system permease protein	BUPH_00925/BUPH_00927
	Burkholderia phymatum (strain DSM 17167 / STM815)	None	None	None	Bphy_4439/Bphy_4437
	Burkholderia phytofirmans (strain DSM 17436 / PsJN)	Bphyt_6042	transcriptional regulator, AraC family	Amidase	Bphyt_4277/Bphyt_4275
					Bphyt_0127/Bphyt_0126
	Burkholderia sp. (strain CCGE1002)	BC1002_3365	transcriptional regulator, AraC family	ABC-2 type transporter	BC1002_4603/BC1002_4605
	Burkholderia sp. (strain CCGE1003)	BC1003_4307	transcriptional regulator, AraC family	ABC-2 type transporter	BC1003_5057/BC1003_5055
	Burkholderia sp. BT03	PMI06_009646	hypothetical protein	Extracellular solute-binding protein, family 7	PMI06_005299.PMI06_005297
		PMI06_009806	diguanylate cyclase	hypothetical protein
	Burkholderia sp. CCGE1001	BC1001_5173	transcriptional regulator, AraC family	ABC-2 type transporter	BC1001_4346/BC1001_4348
	Burkholderia sp. Ch1-1	BCh11DRAFT_07784	hypothetical protein	Fatty acid desaturase	BCh11DRAFT_04495/BCh11DRAFT_04496
		BCh11DRAFT_01048	hypothetical protein	putative membrane protein	BCh11DRAFT_02683/BCh11DRAFT_02685
	Burkholderia sp. H160	BH160DRAFT_3995	conserved hypothetical protein	ABC-2 type transporter	BH160DRAFT_3929/BH160DRAFT_3927
	Burkholderia sp. KJ006	MYA_4966	Transcriptional regulator, LuxR family	Type III secretion inner membrane channel protein (LcrD,HrcV,EscV,SsaV)	MYA_3678/MYA_3681
		MYA_4967	Transcriptional regulator, LuxR family	Manganese transport protein MntH	MYA_4841/MYA_4843
		MYA_5855	Hypothetical protein	Limonene-1,2-epoxide hydrolase
	Burkholderia sp. TJI49	B1M_03257	LuxR superfamily regulatory protein	type III secretion system protein	B1M_35346/B1M_35356
		B1M_03262	LuxR family transcriptional regulator	natural resistance-associated macrophage protein
	Burkholderia terrae BS001	WQE_49488	RNase II stability modulator	putative DNA-binding phage protein	WQE_27065/WQE_27075
	Burkholderia xenovorans (strain LB400)	Bxe_B2275	transcriptional regulator, AraC family	ABC efflux pump, inner membrane subunit	Bxe_C0416/Bxe_C0415
					Bxe_B0610/Bxe_B0608
	Candidatus Burkholderia kirkii UZHbot1	None	None	None	BKIR_c48_6370/BKIR_c48_6371
	Burkholderia mallei (strain ATCC 23344)	BMAA1443	hypothetical protein	hypothetical protein	BMAA1576/BMAA1577
		BMAA1161	hypothetical protein	hypothetical protein	cepR, BMAA1345/BMAA1347
		BMAA1159	hypothetical protein	asparagine synthase (glutamine-hydrolyzing)
		BMA0641	pseudogene	pseudogene
	Burkholderia mallei (strain NCTC 10229)	BMA10229_0079	hypothetical protein	putative membrane protein	bpsR, BMA10229_0607/bpsI, BMA10229_0609
		BMA10229_0081	hypothetical protein	asparagine synthase (glutamine-hydrolyzing)	BMA10229_2022/bpmI, BMA10229_2020
		BMA10229_2169	hypothetical protein	putative D-methionine-binding lipoprotein metQ
		BMA10229_A2915	hypothetical protein	conserved hypothetical protein
	Burkholderia mallei (strain NCTC 10247)	BMA10247_A0854	conserved hypothetical protein	hypothetical protein	bmpR, BMA10247_A0702/bpmI, BMA10247_A0700
		BMA10247_A1539	hypothetical protein	conserved hypothetical protein	bpsR, BMA10247_A0962/bpsI, BMA10247_A0960
		BMA10247_1686	hypothetical protein	conserved hypothetical protein
	Burkholderia mallei (strain SAVP1)	BMASAVP1_A2371	hypothetical protein	conserved hypothetical protein	bpsR, BMASAVP1_0329/bpsI, BMASAVP1_0331
	Burkholderia mallei 2002721280	BMA721280_L0603	hypothetical protein	putative membrane protein	bpsR, BMA721280_L0046/bpsI, BMA721280_L0044
		BMA721280_L0601	hypothetical protein	hypothetical protein
		BMA721280_A1340	hypothetical protein	hypothetical protein
		BMA721280_I0710	hypothetical protein	hypothetical protein
		bmpR, BMA721280_I0554	hypothetical protein	hypothetical protein
	Burkholderia mallei ATCC 10399	BMA10399_B2242	conserved hypothetical protein	hypothetical protein	bpsR, BMA10399_G0187/bpsI, BMA10399_G0185
		bmpR, BMA10399_B2101	hypothetical protein	hypothetical protein
		BMA10399_E0141	hypothetical protein	conserved hypothetical protein
		BMA10399_L0030	hypothetical protein	putative membrane protein
		BMA10399_L0032	hypothetical protein	asparagine synthase (glutamine-hydrolyzing)
	Burkholderia mallei FMH	BMAFMH_E0328	hypothetical protein	asparagine synthase (glutamine-hydrolyzing)	bpsR, BMAFMH_E0556/bpsI, BMAFMH_E0558
		BMAFMH_E0330	hypothetical protein	putative membrane protein	bmpR, BMAFMH_E0835/bpmI, BMAFMH_E0837
		BMAFMH_E0681	conserved hypothetical protein	hypothetical protein
		BMAFMH_C0141	hypothetical protein	hypothetical protein
	Burkholderia mallei GB8 horse 4	BMAGB8_A1636	conserved hypothetical protein	conserved hypothetical protein	BMAGB8_A1521/BMAGB8_A1523
		BMAGB8_0680	conserved hypothetical protein	hypothetical protein	BMAGB8_A1793/bpmI, BMAGB8_A1795
		BMAGB8_A1299	conserved hypothetical protein	asparagine synthase (glutamine-hydrolyzing)
		BMAGB8_A1301	conserved hypothetical protein	conserved hypothetical protein
	Burkholderia mallei JHU	BMAJHU_I0319	hypothetical protein	asparagine synthase (glutamine-hydrolyzing)	bpsR, BMAJHU_I0462/bpsI, BMAJHU_I0464
		BMAJHU_I0321	hypothetical protein	putative membrane protein	bmpR, BMAJHU_I0752/bpmI, BMAJHU_I0754
		BMAJHU_I0576	contig with this end not found	methionine uptake transporter
		BMAJHU_C0145	hypothetical protein	conserved protein
	Burkholderia mallei PRL-20	BMAPRL20_0857	hypothetical protein	hypothetical protein	bpsR, BMAPRL20_1426/bpsI, BMAPRL20_1428
		BMAPRL20_0855	hypothetical protein	conserved hypothetical protein	bmpR, BMAPRL20_1644/bpmI, BMAPRL20_1647
		BMAPRL20_1483	conserved hypothetical protein	hypothetical protein
		BMAPRL20_A0653	conserved hypothetical protein	conserved hypothetical protein
	Burkholderia pseudomallei (strain 1026b)	BP1026B_I0978	adenylylsulfate kinase	alpha/beta fold family hydrolase	pmlR, BP1026B_II0974/pmlI, BP1026B_II0971
		BP1026B_II0341	thiotemplate mechanism natural product synthetase	D-methionine-binding lipoprotein MetQ	BP1026B_II1245/BP1026B_II1251
		BP1026B_II0748	Autoinducer binding LuxR protein	pseudogene	BP1026B_II1672/BP1026B_II1673
		BP1026B_II0749	LuxR family transcriptional regulator	asparagine synthase (glutamine-hydrolyzing)
		BP1026B_II1934	AraC family transcriptional regulator	hypothetical protein
	Burkholderia pseudomallei (strain 1106a)	BURPS1106A_2729	hypothetical protein	conserved hypothetical protein	bpsR, BURPS1106A_A1223/bpsI, BURPS1106A_A1221
		BURPS1106A_A0444	conserved hypothetical protein	hypothetical protein	BURPS1106A_A1570/BURPS1106A_A1577
		BURPS1106A_A0913	conserved hypothetical protein	hypothetical protein	bmpR, BURPS1106A_A2128/bpmI, BURPS1106A_A2129
		BURPS1106A_A0916	hypothetical protein	hypothetical protein
		BURPS1106A_A2451	hypothetical protein	translocator protein, LysE family
	Burkholderia pseudomallei (strain 1710b)	BURPS1710b_A2245	hypothetical protein	hypothetical protein	bpsR, BURPS1710b_A2485/pmlI, BURPS1710b_A2483
		BURPS1710b_A2240	hypothetical protein	hypothetical protein	BURPS1710b_A0617/cepI, BURPS1710b_A0618
		ppuR, BURPS1710b_A1863	thiotemplate mechanism natural product synthetase	D-methionine-binding lipoprotein MetQ	BURPS1710b_A0142/bviI, BURPS1710b_A0145
		BURPS1710b_A0887	transcriptional regulator, AraC family	putative membrane protein
		BURPS1710b_2798	cysC	4'-phosphopantetheinyl transferase su perfamilyfamily
	Burkholderia pseudomallei (strain 668)	BURPS668_2672	hypothetical protein	conserved hypothetical protein	bpsR, BURPS668_A1295/bpsI, BURPS668_A1293
		BURPS668_A0542	hypothetical protein	hypothetical protein	BURPS668_A1652/BURPS668_A1658
		BURPS668_A1000	hypothetical protein	hypothetical protein	bmpR, BURPS668_A2215/bpmI, BURPS668_A2216
		BURPS668_A1002	hypothetical protein	hypothetical protein
		BURPS668_A2587	conserved hypothetical protein	amino acid efflux pump
	Burkholderia pseudomallei (strain K96243)	BPSS1804	putative AraC-family transcriptional regulator	putative membrane protein	pmlR, BPSS0887/pmlI, BPSS0885
		BPSS0676	GerR family regulatory protein	putative asparagine synthetase	BPSS1569/BPSS1570
		BPSS0675	conserved hypothetical protein	putative membrane protein	BPSS1176/BPSS1180
		BPSS0312	putative multifunctional polypeptide synthase	putative lipoprotein
		BPSL2347	pseudogene	conserved hypothetical protein
	Burkholderia pseudomallei 1026a	BP1026A_4016	adenylylsulfate kinase	alpha/beta fold family hydrolase	BP1026A_3358/BP1026A_3360
		BP1026A_3622	AraC family transcriptional regulator	Putative threonine efflux protein	BP1026A_2927/BP1026A_2932
		BP1026A_2425	Autoinducer binding LuxR protein	cytochrome c oxidase, subunit III family protein	pmlR, BP1026A_2654/pmlI, BP1026A_2651
		BP1026A_2426	Autoinducer binding LuxR protein	asparagine synthase
		BP1026A_2035	thiotemplate mechanism natural product synthetase	D-methionine-binding lipoprotein MetQ
	Burkholderia pseudomallei 1106b	BURPS1106B_A1951	hypothetical protein	Predicted alpha/beta hydrolase	BURPS1106B_0420/BURPS1106B_0413
		BURPS1106B_1549	conserved hypothetical protein	hypothetical protein	bpsR, BURPS1106B_0765/bpsI, BURPS1106B_0767
		BURPS1106B_1073	Prokaryotic Cytochrome C oxidase subunit IV	hypothetical protein	bmpR, BURPS1106B_3055/bpmI, BURPS1106B_3054
		BURPS1106B_1070	hypothetical protein	conserved hypothetical protein
		BURPS1106B_2729	hypothetical protein	Putative threonine efflux protein
	Burkholderia pseudomallei 1258a	BP1258A_4410	AraC family transcriptional regulator	Putative threonine efflux protein	BP1258A_4139/BP1258A_4141
		BP1258A_3512	Autoinducer binding LuxR protein	hypothetical protein	BP1258A_3994/BP1258A_3999
		BP1258A_3513	Autoinducer binding LuxR protein	asparagine synthase	pmlR, BP1258A_3740/pmlI, BP1258A_3737
		BP1258A_3136	thiotemplate mechanism natural product synthetase	D-methionine-binding lipoprotein MetQ
		BP1258A_0815	adenylylsulfate kinase	alpha/beta fold family hydrolase
	Burkholderia pseudomallei 1258b	BP1258B_5086	AraC family transcriptional regulator	Putative threonine efflux protein	BP1258B_4813/BP1258B_4815
		BP1258B_3888	Autoinducer binding LuxR protein	Prokaryotic Cytochrome C oxidase subunit IV	BP1258B_4399/BP1258B_4404
		BP1258B_3889	Autoinducer binding LuxR protein	asparagine synthase	pmlR, BP1258B_4119/pmlI, BP1258B_4116
		BP1258B_3514	thiotemplate mechanism natural product synthetase	D-methionine-binding lipoprotein MetQ
		BP1258B_0908	adenylylsulfate kinase	alpha/beta fold family hydrolase
	Burkholderia pseudomallei 1655	BURPS1655_I0168	hypothetical protein	hypothetical protein	bpsR, BURPS1655_I0515/bpsI, BURPS1655_I0513
		BURPS1655_I0170	hypothetical protein	hypothetical protein	bmpR, BURPS1655_D1635/BURPS1655_D1633
		BURPS1655_H0139	hypothetical protein	Eukaryotic translation initiation factor 3 subunit 7 (eIF-3)
		BURPS1655_D1344	hypothetical protein	Putative threonine efflux protein
	Burkholderia pseudomallei 1710a	BURPS1710A_3227	hypothetical protein	Predicted alpha/beta hydrolase	bpsR, BURPS1710A_A0368/bpsI, BURPS1710A_A0366
		BURPS1710A_A0053	conserved hypothetical protein	Prokaryotic Cytochrome C oxidase subunit IV	BURPS1710A_A0734/BURPS1710A_A0738
		BURPS1710A_A0056	hypothetical protein	hypthetical protein	bmpR, BURPS1710A_A1381/bpmI, BURPS1710A_A1383
		BURPS1710A_A2945	conserved hypothetical protein	conserved hypothetical protein
		BURPS1710A_A1728	hypothetical protein	Putative threonine efflux protein
	Burkholderia pseudomallei 305	BURPS305_7402	hypothetical protein	hypothetical protein	bpsR, BURPS305_5194/bpsI, BURPS305_5196
		BURPS305_5990	Hypothetical protein	Putative threonine efflux protein	BURPS305_0807/BURPS305_0801
		BURPS305_5564	conserved hypothetical protein	Prokaryotic Cytochrome C oxidase subunit IV
		bmpR, BURPS305_2226	hypothetical protein	hypothetical protein
		BURPS305_0176	hypothetical protein	hypothetical protein
	Burkholderia pseudomallei 354a	BP354A_5154	AraC family transcriptional regulator	Putative threonine efflux protein	BP354A_4884/BP354A_4886
		BP354A_4008	Autoinducer binding LuxR protein	Prokaryotic Cytochrome C oxidase subunit IV	BP354A_4487/BP354A_4492
		BP354A_4009	Autoinducer binding LuxR protein	asparagine synthase	pmlR, BP354A_4238/pmlI, BP354A_4235
		BP354A_3651	thiotemplate mechanism natural product synthetase	D-methionine-binding lipoprotein MetQ
		BP354A_0898	adenylylsulfate kinase	alpha/beta fold family hydrolase
	Burkholderia pseudomallei 354e	BP354E_6196	thiotemplate mechanism natural product synthetase	D-methionine-binding lipoprotein MetQ	BP354E_4096/BP354E_4098
		BP354E_4364	AraC family transcriptional regulator	Putative threonine efflux protein	BP354E_3698/BP354E_3703
		BP354E_3229	Autoinducer binding LuxR protein	Prokaryotic Cytochrome C oxidase subunit IV	pmlR, BP354E_3427/pmlI, BP354E_3424
		BP354E_3230	Autoinducer binding LuxR protein	asparagine synthase
		BP354E_0711	adenylylsulfate kinase	alpha/beta fold family hydrolase
	Burkholderia pseudomallei 406e	BURPS406E_H0234	hypothetical protein	Predicted alpha/beta hydrolase	bpsR, BURPS406E_G0372/bpsI, BURPS406E_G0370
		BURPS406E_P0053	conserved hypothetical protein	hypothetical protein	BURPS406E_G0717/BURPS406E_G0723
		BURPS406E_G0072	conserved hypothetical protein	hypothetical protein
		BURPS406E_G0075	hypothetical protein	hypothetical protein
		BURPS406E_D0545	hypothetical protein	Putative threonine efflux protein
		bmpR, BURPS406E_D0841	hypothetical protein	oxidoreductase, FAD/FMN-binding
	Burkholderia pseudomallei 576	BUC_5088	hypothetical protein	conserved hypothetical protein	BUC_5811/BUC_5818
		BUC_5086	hypothetical protein	Prokaryotic Cytochrome C oxidase subunit IV	bpsR, BUC_5451/bpsI, BUC_5449
		BUC_2992	conserved hypothetical protein	hypothetical protein	bmpR, BUC_6385/bpmI, BUC_6386
		BUC_6721	hypothetical protein	Putative threonine efflux protein
		BUC_4597	conserved hypothetical protein	conserved hypothetical protein
	Burkholderia pseudomallei BPC006	BPC006_II0422	hypothetical protein	hypothetical protein	BPC006_II2107/BPC006_II2109
		BPC006_II2415	hypothetical protein	Putative threonine efflux protein	BPC006_II1239/BPC006_II1237
		BPC006_II0950	hypothetical protein	cytochrome c oxidase, subunit III	BPC006_II1570/BPC006_II1574
		BPC006_I2771	hypothetical protein	Predicted alpha/beta hydrolase
		BPC006_II0953	hypothetical protein	asparagine synthase
	Burkholderia pseudomallei MSHR1043	D512_27403	hypothetical protein	Putative threonine efflux protein	D512_21534/D512_21524
		D512_20132	hypothetical protein	methionine ABC transporter periiplasmic amino-acid binding protein	D512_31324/D512_31344
		D512_19557	hypothetical protein	Asparagine synthase	D512_26078/D512_26088
		D512_19547	hypothetical protein	Prokaryotic Cytochrome C oxidase subunit IV
		D512_14101	adenylylsulfate kinase	hypothetical protein
	Burkholderia pseudomallei MSHR146	BBN_1091	adenylylsulfate kinase	alpha/beta hydrolase family protein	BBN_4604/BBN_4608
		BBN_4076	Autoinducer binding LuxR protein	asparagine synthase	BBN_5015/BBN_5016
		BBN_4075	Autoinducer binding LuxR protein	prokaryotic Cytochrome C oxidase subunit IV family protein	BBN_4346/BBN_4344
		BBN_3708	AMP-binding enzyme family protein	NLPA lipofamily protein
		BBN_5267	hypothetical protein	Putative threonine efflux protein
	Burkholderia pseudomallei MSHR305	BDL_3905	Autoinducer binding LuxR protein	prokaryotic Cytochrome C oxidase subunit IVfamily protein	BDL_4175/BDL_4173
		BDL_3906	Autoinducer binding LuxR protein	asparagine synthase	BDL_4463/BDL_4467
		BDL_5204	hypothetical protein	Putative threonine efflux protein	BDL_4918/BDL_4919
		BDL_3544	AMP-binding enzyme family protein	NLPA lipofamily protein
		BDL_3142	adenylylsulfate kinase	alpha/beta hydrolase family protein
	Burkholderia pseudomallei MSHR338	M218_32340	hypothetical protein	Prokaryotic Cytochrome C oxidase subunit IV	M218_24055/M218_24065
		M218_32350	hypothetical protein	asparagine synthase	M218_19975/M218_19965
		M218_30410	polyketide synthase	hypothetical protein	M218_21395/M218_21415
		M218_25510	AraC family transcriptional regulator	Putative threonine efflux protein
		M218_12990	hypothetical protein	4-phosphopantetheinyl transferase
	Burkholderia pseudomallei MSHR346	GBP346_B0192	conserved hypothetical protein	cytochrome c oxidase, subunit III	GBP346_B0552/GBP346_B0550
		GBP346_B0194	conserved hypothetical protein	conserved hypothetical protein	GBP346_B0899/GBP346_B0906
		GBP346_B3116	conserved hypothetical protein	conserved hypothetical protein	GBP346_B1544/bpmI, GBP346_B1547
		GBP346_B1891	conserved hypothetical protein	Putative threonine efflux protein
		GBP346_A2851	conserved hypothetical protein	4'-phosphopantetheinyl transferase family protein
	Burkholderia pseudomallei MSHR511	BBQ_964	adenylylsulfate kinase	alpha/beta hydrolase family protein	BBQ_4579/BBQ_4578
		BBQ_5518	Autoinducer binding LuxR protein	asparagine synthase	BBQ_4992/BBQ_4988
		BBQ_4328	hypothetical protein	Putative threonine efflux protein	BBQ_5250/BBQ_5252
		BBQ_5519	Autoinducer binding LuxR protein	prokaryotic Cytochrome C oxidase subunit IV family protein
		BBQ_5887	AMP-binding enzyme family protein	NLPA lipofamily protein
	Burkholderia pseudomallei MSHR520	BBX_1543	adenylylsulfate kinase	alpha/beta hydrolase family protein	BBX_6015/BBX_6013
		BBX_5743	Autoinducer binding LuxR protein	asparagine synthase	BBX_3628/BBX_3632
		BBX_5742	Autoinducer binding LuxR protein	prokaryotic Cytochrome C oxidase subunit IV family protein	BBX_4079/BBX_4080
		BBX_5382	AMP-binding enzyme family protein	NLPA lipofamily protein
		BBX_4370	hypothetical protein	Putative threonine efflux protein
	Burkholderia pseudomallei NAU20B-16	BBS_2573	adenylylsulfate kinase	alpha/beta hydrolase family protein	BBS_4949/BBS_4945
		BBS_5848	AMP-binding enzyme family protein	NLPA lipofamily protein	BBS_5206/BBS_5208
		BBS_4284	hypothetical protein	Putative threonine efflux protein	BBS_4536/BBS_4535
		BBS_5477	Autoinducer binding LuxR protein	prokaryotic Cytochrome C oxidase subunit IV family protein
		BBS_5476	Autoinducer binding LuxR protein	asparagine synthase
	Burkholderia pseudomallei NCTC 13178	BBJ_484	adenylylsulfate kinase	4'-phosphopantetheinyl transferase family	BBJ_4611/BBJ_4609
		BBJ_4344	Autoinducer binding LuxR protein	asparagine synthase	BBJ_5346/BBJ_5347
		BBJ_3963	AMP-binding enzyme family protein	NLPA lipofamily protein	BBJ_4868/BBJ_4872
		BBJ_4343	Autoinducer binding LuxR protein	prokaryotic Cytochrome C oxidase subunit IV family protein
		BBJ_5686	hypothetical protein	Putative threonine efflux protein
	Burkholderia pseudomallei NCTC 13179	BBK_2609	adenylylsulfate kinase	4'-phosphopantetheinyl transferase family protein	BBK_4221/BBK_4222
		BBK_5524	AMP-binding enzyme family protein	NLPA lipofamily protein	BBK_5934/BBK_5930
		BBK_4534	hypothetical protein	Putative threonine efflux protein	BBK_3551/BBK_3553
		BBK_3814	Autoinducer binding LuxR protein	asparagine synthase
		BBK_3815	Autoinducer binding LuxR protein	prokaryotic Cytochrome C oxidase subunit IV family protein
	Burkholderia pseudomallei Pakistan 9	BUH_4735	conserved hypothetical protein	conserved hypothetical protein	bmpR, BUH_6484/bpmI, BUH_6486
		BUH_5224	conserved hypothetical protein	conserved hypothetical protein	bpsR, BUH_5539/bpsI, BUH_5537
		BUH_5221	conserved hypothetical protein	Prokaryotic Cytochrome C oxidase subunit IV	BUH_5897/BUH_5901
		BUH_6817	hypothetical protein	Putative threonine efflux protein
		BUH_2780	conserved hypothetical protein	hypothetical protein
	Burkholderia pseudomallei S13	BURPSS13_T0045	hypothetical protein	Prokaryotic Cytochrome C oxidase subunit IV	bpsR, BURPSS13_T0348/bpsI, BURPSS13_T0346
		BURPSS13_T0047	hypothetical protein	asparagine synthase	BURPSS13_K0123/BURPSS13_K0128
		BURPSS13_X0592	hypothetical protein	Putative threonine efflux protein
		bmpR, BURPSS13_X0289	hypothetical protein	hypothetical protein
		BURPSS13_J0347	thiotemplate mechanism natural product synthetase	hypothetical protein
		BURPSS13_V0145	hypothetical protein	Predicted alpha/beta hydrolase
	Burkholderia thailandensis (strain E264 / ATCC 700388 / DSM 13276 / CIP 106301)	BTH_I1817	adenylylsulfate kinase	Predicted alpha/beta hydrolase	BTH_II1510/BTH_II1512
		BTH_II2087	thiotemplate mechanism natural product synthetase	D-methionine ABC transporter, periplasmic D-methionine-binding protein	BTH_II1231/BTH_II1227
		BTH_II1751	Autoinducer binding LuxR protein	Trehalase	BTH_II0805/BTH_II0804
		BTH_II1750	Autoinducer binding LuxR protein	asparagine synthase
		BTH_II1681	hypothetical protein	hypothetical protein
		BTH_II0575	transcriptional regulator, AraC family	Transposase
	Burkholderia thailandensis 2002721723	BTQ_5367	AMP-binding enzyme family protein	NLPA lipofamily protein	BTQ_4516/BTQ_4512
		BTQ_5587	dihydrolipoyl dehydrogenase	hypothetical protein	BTQ_4091/BTQ_4090
		BTQ_4969	putative DNA binding protein	hypothetical protein	BTQ_4797/BTQ_4799
		BTQ_2097	adenylylsulfate kinase	alpha/beta hydrolase family protein
		BTQ_5039	Autoinducer binding LuxR protein	trehalase family protein
		BTQ_3869	araC-like ligand binding domain protein	putative transposase
		BTQ_5038	Autoinducer binding LuxR protein	aspragine synthase
	Burkholderia thailandensis E444	BTJ_215	adenylylsulfate kinase	alpha/beta hydrolase family protein	BTJ_5499/BTJ_5495
		BTJ_4019	pseudogene	NLPA lipofamily protein	BTJ_5123/BTJ_5122
		BTJ_3596	putative dNA-binding protein	hypothetical protein	BTJ_3429/BTJ_3431
		BTJ_4902	araC-like ligand binding domain protein	transposase DDE domain protein
		BTJ_3665	Autoinducer binding LuxR protein	asparagine synthase
		BTJ_4242	dihydrolipoyl dehydrogenase	hypothetical protein
		BTJ_3666	Autoinducer binding LuxR protein	trehalase family protein
	Burkholderia thailandensis H0587	BTL_4443	putative dNA-binding protein	hypothetical protein	BTL_4170/BTL_4169
		BTL_5052	dihydrolipoyl dehydrogenase	hypothetical protein	BTL_4277/BTL_4279
		BTL_1509	adenylylsulfate kinase	alpha/beta hydrolase family protein	BTL_3961/BTL_3957
		BTL_4842	AMP-binding enzyme family protein	NLPA lipofamily protein	BTL_3595/BTL_3594
		BTL_4512	Autoinducer binding LuxR protein	asparagine synthase
		BTL_5693	araC-like ligand binding domain protein	Putative threonine efflux protein
		BTL_4513	Autoinducer binding LuxR protein	trehalase family protein
	Burkholderia thailandensis MSMB121	BTI_1287	adenylylsulfate kinase	alpha/beta hydrolase family protein	BTI_4048/BTI_4049
		BTI_5483	Autoinducer binding LuxR protein	trehalase family protein	BTI_5706/BTI_5704
		BTI_4419	AMP-binding enzyme family protein	NLPA lipofamily protein
		BTI_5484	Autoinducer binding LuxR protein	trehalase family protein
		BTI_4599	diguanylate cyclase domain protein	bacterial extracellular solute-binding, 7 family protein
	Cupriavidus necator (strain ATCC 43291 / DSM 13513 / N-1)	None	None	None	CNE_BB1p13440/solI, CNE_BB1p13480
	Cupriavidus sp. HPC(L)	B551_0215905	MFS transporter	alanine racemase	None
		B551_0214435	heat shock protein HSP31	GMP synthase
	Cupriavidus sp. SK-4	CF68_08735	LuxR family protein	hypothetical protein	CF68_33755/CF68_33770
	Cupriavidus taiwanensis (strain R1 / LMG 19424)	RALTA_B1249	putative muconolactone transporter; Major facilitator superfamily MFS_1	T3SS inner membrane protein	None
	Lautropia mirabilis ATCC 51599	bmaR, HMPREF0551_0305	autoinducer-binding transcriptional regulator BmaR5	Tat pathway signal sequence domain protein	None
		bmaR, HMPREF0551_0306	hypothetical protein	autoinducer binding transcriptional regulator
	Pandoraea sp. SD6-2	C266_16120	LysR family transcriptional regulator	hypothetical protein	None
		C266_05074	Inner membrane protein	hypothetical protein
	Ralstonia pickettii (strain 12J)	Rpic_0460	hypothetical protein	transcriptional regulator, XRE family	None
	Ralstonia pickettii OR214	OR214_04710	hypothetical protein	transcriptional regulator, XRE family	None
		OR214_02697	hypothetical protein	diguanylate cyclase/phosphodiesterase
	Ralstonia solanacearum (strain GMI1000)	None	None	None	solR, RSc3287, RS02516/solI, RSc3286, RS02515
					RSp0778/RSp0779
	Ralstonia solanacearum (strain Po82)	None	None	None	solR, RSPO_c00169/solI, RSPO_c00170
	Ralstonia solanacearum CFBP2957	None	None	None	solR, RCFBP_10190/solI, RCFBP_10191
	Ralstonia solanacearum CMR15	None	None	None	solR, CMR15_10179/solI, CMR15_10180
					CMR15_mp10742/solI, CMR15_mp10744
	Ralstonia solanacearum FQY_4	None	None	None	F504_3332/F504_3331
					rhiR, F504_4446/rhiL, F504_4445
	Ralstonia solanacearum IPO1609	None	None	None	solR, RSIPO_02986/solI, RSIPO_02985
	Ralstonia solanacearum K60-1	None	None	None	solR, RSK60_260012/solI, RSK60_260013
	Ralstonia solanacearum P673	None	None	None	RSP673_00785/RSP673_00790
	Ralstonia solanacearum SD54	None	None	None	L665_04828/L665_04829
					L665_00422/L665_00421
	Ralstonia solanacearum UW551	None	None	None	solR, RRSL_02791/solI, RRSL_02792
	Ralstonia sp. 5_2_56FAA	HMPREF0989_00220	hypothetical protein	diguanylate cyclase (GGDEF) domain-containing protein	None
	Ralstonia sp. 5_7_47FAA	bmaR, HMPREF1004_00719	F5/8 type C domain protein	diguanylate cyclase (GGDEF) domain protein	None
	Ralstonia sp. AU12-08	C404_04295	Hypothetical protein	Predicted acyltransferases	None
	Acidovorax avenae (strain ATCC 19860 / DSM 7227 / JCM 20985 / NCPPB 1011)	Acav_2498	Transposase	Alpha/beta hydrolase family;	None
	Acidovorax citrulli (strain AAC00-1)	None	None	None	Aave_3810/Aave_3811
	Acidovorax sp. CF316	PMI14_02698	putative regulator of cell autolysis	transcriptional regulator	None
		PMI14_06091	hypothetical protein	hypothetical protein
	Acidovorax sp. NO-1	KYG_07141	hypothetical protein	transposase	None
	Comamonas testosteroni ATCC 11996	CTATCC11996_11418	chaperone protein HchA	beta-lactamase	None
	Comamonas testosteroni (strain CNB-2)	CtCNB1_2596	ThiJ/PfpI	Beta-lactamase	None
	Comamonas testosteroni S44	CTS44_03236	chaperone protein HchA	Beta-lactamase	None
	Delftia sp. (strain Cs1-4)	None	None	None	DelCs14_1732/DelCs14_1734
	Hydrogenophaga sp. T4	Y695_00731	hypothetical protein	Type IV secretion system protein virB1	None
		Y695_00423	hypothetical protein	hypothetical protein
	Polaromonas sp. (strain JS666 / ATCC BAA-500)	Bpro_5478	hypothetical protein	alkane 1-monooxygenase	None
	Variovorax paradoxus (strain EPS)	Varpa_4968	Peptidoglycan-binding lysin domain	ornithine cyclodeaminase/mu-crystallin	None
		Varpa_4987	tRNA-Met3	helix-turn-helix domain protein
	Variovorax paradoxus (strain S110)	None	None	None	Vapar_5809/Vapar_5808
	Variovorax paradoxus B4	VAPA_2c06370	transcriptional regulator, AraC family	hypothetical protein	solR, VAPA_2c00040/solI, VAPA_2c00050
	Variovorax sp. CF313	PMI12_03475	N-formylglutamate amidohydrolase	tRNA	None
	Collimonas fungivorans (strain Ter331)	CFU_0152	response regulator	hypothetical protein	CFU_1957/pmlI, CFU_1956
	Massilia timonae CCUG 45783	None	None	None	HMPREF9710_02776/HMPREF9710_02778
	Leptothrix cholodnii (strain ATCC 51168 / LMG 8142 / SP-6)	Lcho_0875	hypothetical protein	conserved hypothetical protein	None
	Methylibium petroleiphilum (strain PM1)	Mpe_A3796	hypothetical protein	hypothetical protein	None
	Methylibium sp. T29	lasR, X551_00776	hypothetical protein	hypothetical protein	None
	Methylibium sp. T29-B	lasR, Y694_01305	hypothetical protein	hypothetical protein	None
	Rubrivivax benzoatilyticus JA2 = ATCC BAA-35	RBXJA2T_08755	hypothetical protein	hypothetical protein	None
	Rubrivivax gelatinosus (strain NBRC 100245 / IL144)	RGE_24620	hypothetical protein	hypothetical protein	None
	Thiomonas arsenitoxydans (strain DSM 22701 / CIP 110005 / 3As)	None	None	None	AfeR, THI_1723/THI_1725
Gallionellales	Gallionella capsiferriformans (strain ES-2)	None	None	None	Galf_1448/Galf_1450
Neisseriales	Chromobacterium violaceum (strain ATCC 12472 / DSM 30191 / JCM 1249 / NBRC 12614 / NCIMB 9131 / NCTC 9757)	CV_2246	flavoprotein NADH-dependent oxidoreductase	transaldolase	cviR, CV_4090/cviI, CV_4091
	Pseudogulbenkiania ferrooxidans 2002	FuraDRAFT_2418	Cytochrome C oxidase, mono-heme subunit/	hypothetical protein	None
	Pseudogulbenkiania ferrooxidans EGD-HP2	O166_21735	transcriptional regulator	aldehyde dehydrogenase	None
Nitrosomonadales	Nitrosospira multiformis (strain ATCC 25196 / NCIMB 11849)	None	None	None	Nmul_A2417/Nmul_A2390
	Nitrosospira sp. APG3	None	None	None	EBAPG3_27410/EBAPG3_26260
Rhodocyclales	Aromatoleum aromaticum (strain EbN1)	lasR, p1B112	Primase	hypothetical protein	None
	Azoarcus sp. KH32C	AZKH_2266	alcohol dehydrogenase containing zinc-binding domain	hypothetical protein	None
	Thauera linaloolentis 47Lol = DSM 12138	C666_11340	TetR family transcriptional regulator	short chain dehydrogenase/reductase oxidoreductase	None
	Thauera phenylacetica B4P	None	None	None	C667_00435/C667_00445
	Thauera sp. 27	B447_01941	hypothetical protein	hypothetical protein	None
	Thauera sp. 28	C662_05767	hypothetical protein	hypothetical protein	None
Gammaproteobacteria
Acidithiobacillales	Acidithiobacillus ferrivorans SS3	Acife_1471	hypothetical protein	Pseudogene	None
	Acidithiobacillus ferrooxidans (strain ATCC 23270 / DSM 14882 / NCIB 8455)	None	None	None	AFE_1997/AFE_1999
	Acidithiobacillus ferrooxidans (strain ATCC 53993)	None	None	None	Lferr_1664/Lferr_1666
	Acidithiobacillus sp. GGI-221	None	None	None	GGI1_07647/GGI1_22579
Aeromonadales	Aeromonas diversa 2478-85	G114_18954	chromosome segregation ATPase	5S ribosomal RNA	G114_07264/G114_07259
	Aeromonas hydrophila 4AK4	AH4AK4_3225	arsR	hemolysin co-regulated protein	AH4AK4_0462/AH4AK4_0461
		AH4AK4_4241	hypothetical protein	glucosamine/fructose-6-phosphate aminotransferase, isomerizing
	Aeromonas hydrophila AD9	AT59_02375	tRNA-Ser	type VI secretion system effector, Hcp1 family	AT59_22285/AT59_22280
		AT59_16775	chromosome partitioning protein ParA	glucosamine--fructose-6-phosphateaminotransferase
	Aeromonas hydrophila AL09-71	V428_23135	chromosome partitioning protein ParA	glucosamine--fructose-6-phosphateaminotransferase	V428_03000/V428_02995
		V428_06185	tRNA-Ser	type IV secretion protein Rhs
	Aeromonas hydrophila ML09-119	AHML_22145	chromosome segregation ATPase	glucosamine--fructose-6-phosphate aminotransferase	AHML_02850 (AsaR)/AHML_02845(AhyI)
		AHML_05965	tRNA-Ser	HcpA-like protein
	Aeromonas hydrophila SSU	HMPREF1171_03574	hypothetical protein	glucosamine-fructose-6-phosphate aminotransferase	HMPREF1171_04051/HMPREF1171_04050
		HMPREF1171_02409	tRNA-Ser	Hcp1 family type VI secretion system effector
	Aeromonas hydrophila YL17	AI20_13640	hypothetical protein	type VI secretion system effector, Hcp1 family	AI20_16590/AI20_16595
		AI20_19195	chromosome partitioning protein ParA	glucosamine--fructose-6-phosphate aminotransferase
	Aeromonas hydrophila pc104A	V429_06185	tRNA-Ser	type IV secretion protein Rhs	V429_03000/V429_02995
		V429_23170	chromosome partitioning protein ParA	glucosamine--fructose-6-phosphate aminotransferase
	Aeromonas hydrophila subsp. hydrophila (strain ATCC 7966 / NCIB 9240)	AHA_1117	tRNA-Ser	HcpA-like protein	AHA_0557 (ahyR)/AHA_0556(ahyI)
		AHA_4253	chromosome segregation ATPase	glmS
	Aeromonas molluscorum 848	G113_02954	hypothetical protein	glucosamine--fructose-6-phosphate aminotransferase	G113_01474/G113_01479
	Aeromonas salmonicida subsp. masoucida NBRC 13784	ASA01S_002_01000	hypothetical protein	glutamine--fructose-6-phosphate aminotransferase	ASA01S_015_00250/ASA01S_015_00260
	Aeromonas salmonicida subsp. pectinolytica 34mel	K931_12941	hypothetical protein	glucosamine--fructose-6-phosphate aminotransferase	K931_21420/K931_21425
	Aeromonas salmonicida (strain A449)	ASA_4324	TonB system biopolymer transport component; Chromosome segregation ATPase	N-acetyl transferase family protein	ASA_3763/ASA_3762
	Aeromonas salmonicida subsp. salmonicida 01-B526	IYQ_23335	protein of unknown function	N-acetyl transferase family protein	IYQ_12528/IYQ_12533
	Aeromonas veronii (strain B565)	B565_3995	Chromosome segregation ATPase	Glucosamine--fructose-6-phosphate aminotransferase	B565_0594/B565_0593
	Aeromonas veronii AER39	HMPREF1167_03166	protein of unknown function	glucosamine-fructose-6-phosphate aminotransferase	HMPREF1167_01334/HMPREF1167_01335
	Aeromonas veronii AER397	HMPREF1169_03713	protein of unknown function	glucosamine-fructose-6-phosphate aminotransferase	HMPREF1169_03088/HMPREF1169_03089
	Aeromonas veronii AMC34	HMPREF1168_04048	TonB-dependent hemoglobin/transferrin/lactoferrin receptor family protein	hypothetical protein	HMPREF1168_01467/HMPREF1168_01466
		HMPREF1168_00882	protein of unknown function	glucosamine-fructose-6-phosphate aminotransferase
	Aeromonas veronii AMC35	HMPREF1170_02150	histone-like protein	Hcp1 family type VI secretion system effector	HMPREF1170_03885/HMPREF1170_03886
		HMPREF1170_00482	protein of unknown function	glucosamine-fructose-6-phosphate aminotransferase
		HMPREF1170_01430	glutamine amidotransferase superfamily	protein of unknown function
	Aeromonas veronii Hm21	M001_15060	ligand-gated channel protein	Contig ends here-don’t know what gene	M001_21820/M001_21815
		M001_11875	hypothetical protein	glucosamine--fructose-6-phosphate aminotransferase
	Tolumonas auensis (strain DSM 9187 / TA4)	Tola_0299	UDP-N-acetylglucosamine pyrophosphorylase	transcriptional regulator, ModE family	None
Alteromonadales	Agarivorans albus MKT 106	None	None	None	AALB_2966/AALB_2968
	Glaciecola mesophila KMM 241	None	None	None	GMES_4266/GMES_4268
	Saccharophagus degradans (strain 2-40 / ATCC 43961 / DSM 17024)	None	None	None	Sde_3500/Sde_3498
	Moritella sp. PE36	None	None	None	PE36_19765/PE36_19755
	Pseudoalteromonas atlantica (strain T6c / ATCC BAA-1087)	None	None	None	Patl_0359/Patl_0361
	Pseudoalteromonas citrea NCIMB 1889	None	None	None	PCIT_13149/PCIT_13144
	Pseudoalteromonas rubra ATCC 29570	PRUB_22926	histidine kinase	hypothetical protein	None
	Shewanella decolorationis S12	SHD_3842	chaperone protein	membrane protein (mgtA)	None
	Shewanella violacea (strain JCM 10179 / CIP 106290 / LMG 19151 / DSS12)	None	None	None	SVI_3459/SVI_3460
	Shewanella woodyi (strain ATCC 51908 / MS32)	None	None	None	Swoo_2997/Swoo_2998
	gamma proteobacterium IMCC1989	IMCC1989_1823	Rhs family protein	Class II aldolase/adducin-like protein	None
Chromatiales	uncultured Thiohalocapsa sp. PB-PSB1	None	None	None	N838_30990/N838_30985
	Thiorhodococcus drewsii AZ1	ThidrDRAFT_4134	hypothetical protein	fatty acid desaturase	None
	Thiorhodococcus sp. AK35	D779_3892	Hypothetical protein	MiaB family protein, possibly involved in tRNA or rRNA modification	None
	Nitrococcus mobilis Nb-231	None	None	None	NB231_13401/NB231_13406
	Halothiobacillus neapolitanus (strain ATCC 23641 / c2)	None	None	None	Hneap_0963/Hneap_0965
Enterobacteriales	Arsenophonus nasoniae (son-killer infecting Nasonia vitripennis)	ARN_33580	CRISPR/Cas system-associated RAMP superfamily protein	hypothetical protein	ARN_29970/ARN_29960
					ARN_33550/ARN_33540
	Brenneria sp. EniD312	BrE312_1535	proline imino peptidase	hypothetical protein	BrE312_1599/BrE312_1598
	Cedecea davisae DSM 4568	HMPREF0201_02723 (BpsR)	III protein, CoA-transferase family	hypothetical protein	None
	Citrobacter amalonaticus Y19	SdiA	putative amino-acid ABC transporter ATP-binding protein YecC	hypothetical protein	None
	Citrobacter freundii 4_7_47CFAA	HMPREF9428_01886	putative amino-acid ABC transporter ATP-binding protein YecC	hypothetical protein	None
	Citrobacter freundii ATCC 8090 = MTCC 1658	D186_12327(sdiA)	amino-acid ABC transporter ATP-binding protein YecC	hypothetical protein	None
	Citrobacter freundii CFNIH1	CFNIH1_20805	amino acid ABC transporter ATP-binding protein	hypothetical protein	None
	Citrobacter freundii GTC 09479	H262_04320 (sdiA)	amino-acid ABC transporter ATP-binding protein YecC	hypothetical protein	None
	Citrobacter freundii GTC 09629	H922_15490 (sdiA)	amino-acid ABC transporter ATP-binding protein YecC	hypothetical protein	None
	Citrobacter freundii RLS1	V172_17855	amino acid ABC transporter ATP-binding protein	hypothetical protein	None
	Citrobacter freundii UCI 31	P834_07135	cystine transport system ATP-binding protein	hypothetical protein	None
	Citrobacter freundii UCI 32	P835_02569	cystine transport system ATP-binding protein	hypothetical protein	None
	Citrobacter youngae ATCC 29220	CIT292_06641	ABC transporter, ATP-binding protein	hypothetical protein	None
	Citrobacter koseri (strain ATCC BAA-895 / CDC 4225-83 / SGSC4696)	CKO_01029	putative ATP-binding component of a transport system	hypothetical protein	None
	Citrobacter rodentium (strain ICC168)	ROD_19711(sdiA)	putative cystine ABC-transporter, ATP-binding protein	conserved hypothetical protein	ROD_29511(croR)/ROD_29521(croI)
	Citrobacter sp. 30_2	CSAG_01773 (sdiA)	putative amino-acid ABC transporter ATP-binding protein YecC	hypothetical protein	None
	Citrobacter sp. A1	WYG_4692 (sdiA)	amino acid ABC transporter	hypothetical protein	None
	Citrobacter sp. KTE151	WC7_02567 (sdiA)	ABC transporter ATP-binding protein	hypothetical protein	None
	Citrobacter sp. KTE30	WC1_02578	ABC transporter ATP-binding protein	hypothetical protein	None
	Citrobacter sp. KTE32	WEU_02542	ABC transporter ATP-binding protein	hypothetical protein	None
	Citrobacter sp. L17	B397_2368	ABC transporter family protein	hypothetical protein	None
	Cronobacter condimenti 1330	BN137_1072	Cystine ABC transporter, ATP-binding protein	Putative cytoplasmic protein	None
	Cronobacter dublinensis 1210	BN134_3989 (sdiA)	Cystine ABC transporter, ATP-binding protein	putative cytoplasmic protein	none
	Cronobacter dublinensis 582	BN133_4236 (SdiA)	hypothetical protein	putative cytoplasmic protein	None
	Cronobacter malonaticus 507	BN130_1275 (sdiA)	Cystine ABC transporter, ATP-binding protein	Putative cytoplasmic protein	None
	Cronobacter malonaticus 681	BN131_797	Cystine ABC transporter, permease protein	Putative cytoplasmic protein	None
	Cronobacter sakazakii (strain ATCC BAA-894)	ESA_01307 (sdiA)	putative amino-acid ABC transporter ATP-binding protein YecC	hypothetical protein	None
	Cronobacter sakazakii 680	BN126_3899 (sdiA)	Cystine ABC transporter, ATP-binding protein	Putative cytoplasmic protein	None
	Cronobacter sakazakii 696	BN128_1452 (sdiA)	Cystine ABC transporter, ATP-binding protein	Putative cytoplasmic protein	None
	Cronobacter sakazakii 701	BN129_1690 (sdiA)	Cystine ABC transporter, permease protein	Putative cytoplasmic protein	None
	Cronobacter sakazakii CMCC 45402	P262_02217	putative amino-acid ABC transporter ATP-binding protein YecC	yecF protein	None
	Cronobacter sakazakii E899	CSE899_17106 (sdiA)	putative amino-acid ABC transporter ATP-binding protein YecC	hypothetical protein	None
	Cronobacter sakazakii ES15	ES15_1528 (sdiA)	putative amino-acid ABC transporter ATP-binding protein YecC	hypothetical protein	None
	Cronobacter sakazakii SP291	CSSP291_06425 (sdiA)	amino-acid ABC transporter ATP-binding protein YecC	hypothetical protein	None
	Cronobacter turicensis (strain DSM 18703 / LMG 23827 / z3032)	Ctu_26190 (sdiA)	Uncharacterized amino-acid ABC transporter ATP-binding protein yecC	Uncharacterized protein yecF	None
	Cronobacter turicensis 564	BN132_4220	Cystine ABC transporter, ATP-binding protein	Putative cytoplasmic protein	None
	Cronobacter universalis NCTC 9529	BN136_972	Cystine ABC transporter, permease protein	Putative cytoplasmic protein	None
	Dickeya dadantii (strain 3937)	Dda3937_00840	ABC transporter_permease component	hypothetical protein, the next gene is a peptidase	Dda3937_03218 (expR)/ expI
	Dickeya dadantii (strain Ech586)	Dd586_2919	peptide ABC transporter, permease protein	proline-specific peptidase	Dd586_0111/Dd586_0111
	Dickeya dadantii (strain Ech703)	Dd703_0127	GtrA family protein	conserved hypothetical protein	None
	Dickeya solani D s0432-1	A544_1342	putative dipeptide ABC transporter, permease protein	hypothetical protein; A544_1340-proline imino peptidase	A544_0112 (expR)/A544_0113 (ypeI)
	Dickeya zeae (strain Ech1591)	None	None	None	Dd1591_0100/Dd1591_0101
	Edwardsiella ictaluri (strain 93-146)	None	None	None	NT01EI_2880/NT01EI_2879
	Edwardsiella piscicida C07-087	None	None	None	ETAC_12465/ETAC_12470
	Edwardsiella tarda (strain EIB202)	None	None	None	ETAE_2593/ETAE_2594
	Edwardsiella tarda (strain FL6-60)	None	None	None	edwR (ETAF_2334)/edwI (ETAF_2335)
	Edwardsiella tarda NBRC 105688	None	None	None	ET1_12_02220/ET1_12_02210
	Edwardsiella tarda ATCC 23685	None	None	None	EDWATA_03059/EDWATA_03060
	Enterobacter aerogenes (strain ATCC 13048 / DSM 30053 / JCM 1235 / KCTC 2190 / NBRC 13534 / NCIMB 10102 / NCTC 10006)	sdiA (EAE_23035)	putative amino-acid ABC transporter ATP-binding protein YecC	hypothetical protein	None
	Enterobacter aerogenes EA1509E	sdiA	CoA transferase, CAIB/BAIF family	putative cytoplasmic protein	None
	Enterobacter aerogenes UCI 15	P817_02166	CoA-transferase family III	hypothetical protein	None
	Enterobacter aerogenes UCI 16	P819_02255	CoA-transferase family III	hypothetical protein	None
	Enterobacter aerogenes UCI 27	P830_02398	CoA-transferase family III	hypothetical protein	None
	Enterobacter aerogenes UCI 28	P831_04423	CoA-transferase family III	hypothetical protein	None
	Enterobacter aerogenes UCI 45	P848_02673	CoA-transferase family III	hypothetical protein	None
	Enterobacter aerogenes UCI 46	P849_02550	CoA-transferase family III	hypothetical protein	None
	Enterobacter aerogenes UCI 47	P850_02822	CoA-transferase family III	hypothetical protein	None
	Enterobacter aerogenes UCI 48	P851_02819	CoA-transferase family III	hypothetical protein	None
	Enterobacter cancerogenus ATCC 35316	ENTCAN_06648	ABC transporter, ATP-binding protein	hypothetical protein	None
	Enterobacter asburiae (strain LF7a)	Entas_2633	ABC transporter related protein	hypothetical protein	None
	Enterobacter asburiae L1	DI57_05195	amino acid ABC transporter ATP-binding protein	hypothetical protein	DI57_07700/DI57_07710
	Enterobacter cloacae BIDMC 8	L435_06349	hypothetical protein, cystine transport system ATP-binding protein	hypothetical protein	None
	Enterobacter cloacae BWH 29	sdiA (L400_00859)	hypothetical protein, cystine transport sytem ATP-binding protein	hypothetical protein	None
	Enterobacter cloacae BWH 31	sdiA (L402_04423)	cystine transport system ATP-binding protein	hypothetical protein	L402_03862/L402_03861
	Enterobacter cloacae EC_38VIM1	L799_02540	ABC transporter	hypothetical protein	L799_18905/L799_18910 (croI)
	Enterobacter cloacae EcWSU1	sdiA (EcWSU1_02857)	Uncharacterized amino-acid ABC transporter ATP-binding protein YecC	Uncharacterized protein YecF	None
	Enterobacter cloacae ISC8	quorum-sensing transcriptional activator	Cystine ABC transporter, ATP-binding protein	hypothetical protein	None
	Enterobacter cloacae P101	M942_10855	ABC transporter	hypothetical protein	None
	Enterobacter cloacae S611	sdiA (EDP2_2434)	ABC transporter family protein	conserved hypothetical protein	None
	Enterobacter cloacae UCI 23	P826_02240	cystine transport system ATP-binding protein	hypothetical protein	None
	Enterobacter cloacae UCI 24	P827_01282	cystine transport system ATP-binding protein	hypothetical protein	None
	Enterobacter cloacae UCI 30	P833_02263	cystine transport system ATP-binding protein	hypothetical protein	None
	Enterobacter cloacae UCI 35	P838_03720	hypothetical protein, cystine transport system ATP-binding protein	hypothetical protein	None
	Enterobacter cloacae UCI 36	P839_04144	hypothetical protein, cystine transport system ATP-binding protein	hypothetical protein	None
	Enterobacter cloacae UCI 39	P842_01987	cystine transport system ATP-binding protein	hypothetical protein	P842_01388/P842_01387
	Enterobacter cloacae UCI 49	P852_02606	cystine transport system ATP-binding protein	hypothetical protein	P852_02103/P852_02102
	Enterobacter cloacae UCI 50	P853_00515	hypothetical protein, cystine transport system ATP-binding protein	hypothetical protein	None
	Enterobacter cloacae UCICRE 11	sdiA (L422_00086)	cystine transport system ATP-binding protein	hypothetical protein	None
	Enterobacter cloacae UCICRE 12	None	None	None	L423_00352/L423_00353
	Enterobacter cloacae UCICRE 3	sdiA (L414_03007)	hypothetical protein, cystine transport system ATP-binding protein	hypothetical protein	None
	Enterobacter cloacae UCICRE 5	sdiA (L416_02824)	cystine transport system ATP-binding protein	hypothetical protein	None
	Enterobacter cloacae UCICRE 9	sdiA (L420_03883)	hypothetical protein, cystine transport system ATP-binding protein	hypothetical protein	None
	Enterobacter cloacae str. Hanford	EcloH_0823	Phosphonate-transporting ATPase	protein of unknown function	None
	Enterobacter cloacae subsp. cloacae (strain ATCC 13047 / DSM 30054 / NBRC 13535 / NCDC 279-56)	sdiA (ECL_01372)	cystine transport system ATP-binding protein	hypothetical protein	None
	Enterobacter cloacae subsp. cloacae ENHKU01	sdiA (ECENHK_14010)	amino-acid ABC transporter ATP-binding protein YecC	hypothetical protein	None
	Enterobacter cloacae subsp. cloacae GS1	sdiA (PGS1_11336)	putative amino-acid ABC transporter ATP-binding protein YecC	hypothetical protein	None
	Enterobacter cloacae subsp. cloacae NCTC 9394	sdiA (ENC_05610)	hypothetical protein	Protein of unknown function (DUF2594)	None
	Enterobacter cloacae subsp. dissolvens SDM	sdiA (A3UG_14270)	putative amino-acid ABC transporter ATP-binding protein YecC	hypothetical protein	None
	Enterobacter hormaechei ATCC 49162	sdiA (HMPREF9086_2927)	glutamine ABC superfamily ATP binding transporter, ABC protein	hypothetical protein	None
	Enterobacter lignolyticus (strain SCF1)	Entcl_1826	L-carnitine dehydratase/bile acid-inducible protein F	Protein of unknown function DUF2594	Entcl_2037/Entcl_2036
	Enterobacter sp. BIDMC 26	L462_02036	cystine transport system ATP-binding protein	hypothetical protein	None
	Enterobacter sp. BIDMC 27	L463_03535	cystine transport system ATP-binding protein	hypothetical protein	None
	Enterobacter sp. BIDMC 28	L464_00102	cystine transport system ATP-binding protein	hypothetical protein	None
	Enterobacter sp. BIDMC 29	L465_01419	cystine transport system ATP-binding protein	hypothetical protein	None
	Enterobacter sp. BIDMC 30	L466_01991	cystine transport system ATP-binding protein	hypothetical protein	None
	Enterobacter sp. BWH 27	L398_01819	hypothetical protein, cystine transport system ATP-binding protein	hypothetical protein	None
	Enterobacter sp. BWH 37	L406_03514	hypothetical protein, cystine transport system ATP-binding protein	hypothetical protein	None
	Enterobacter sp. BWH 39	L407_01641	hypothetical protein, cystine transport system ATP-binding protein	hypothetical protein	None
	Enterobacter sp. MGH 1	L347_05340	cystine transport system ATP-binding protein	Hypothetical protein	None
	Enterobacter sp. MGH 10	L356_08475	cystine transport system ATP-binding protein	hypothetical protein	None
	Enterobacter sp. MGH 11	L357_01687	hypothetical protein, cystine transport system ATP-binding protein	hypothetical protein	None
	Enterobacter sp. MGH 12	L358_00275	hypothetical protein, cystine transport system ATP-binding protein	hypothetical protein	None
	Enterobacter sp. MGH 13	L359_05209	hypothetical protein, cystine transport system ATP-binding protein	hypothetical protein	None
	Enterobacter sp. MGH 14	sdiA (L360_02859)	hypothetical protein, cystine transport system ATP-binding protein	hypothetical protein	None
	Enterobacter sp. MGH 15	L361_01783	cystine transport system ATP-binding protein	hypothetical protein	None
	Enterobacter sp. MGH 16	sdiA (L362_02042)	cystine transport system ATP-binding protein	hypothetical protein	L362_01493/L362_01492
	Enterobacter sp. MGH 2	L348_06030	hypothetical protein, cystine transport system ATP-binding protein	hypothetical protein	None
	Enterobacter sp. MGH 22	sdiA (L368_01856)	cystine transport system ATP-binding protein	hypothetical protein	None
	Enterobacter sp. MGH 23	sdiA (L369_03046)	cystine transport system ATP-binding protein	hypothetical protein	None
	Enterobacter sp. MGH 24	sdiA (L370_04066)	cystine transport system ATP-binding protein	hypothetical protein	None
	Enterobacter sp. MGH 25	sdiA (L371_00923)	cystine transport system ATP-binding protein	hypothetical protein	None
	Enterobacter sp. MGH 26	sdiA (L372_02801)	hypothetical protein	hypothetical protein	None
	Enterobacter sp. MGH 3	L349_05664	hypothetical protein, cystine transport system ATP-binding protein	hypothetical protein	None
	Enterobacter sp. MGH 33	L379_02962	cystine transport system ATP-binding protein	hypothetical protein	None
	Enterobacter sp. MGH 34	sdiA (L380_00194)	cystine transport system ATP-binding protein	hypothetical protein	L380_04284/L380_04283
	Enterobacter sp. MGH 37	L383_02036	cystine transport system ATP-binding protein	hypothetical protein	None
	Enterobacter sp. MGH 38	sdiA (L384_03750)	hypothetical protein, cystine transport system ATP-binding protein	hypothetical protein	None
	Enterobacter sp. MGH 4	L350_04780	hypothetical protein, cystine transport system ATP-binding protein	hypothetical protein	None
	Enterobacter sp. MGH 5	L351_05075	hypothetical protein, cystine transport system ATP-binding protein	hypothetical protein	None
	Enterobacter sp. MGH 6	L352_05911	cystine transport system ATP-binding protein	hypothetical protein	None
	Enterobacter sp. MGH 7	L353_07616	hypothetical protein, cystine transport system ATP-binding protein	hypothetical protein	None
	Enterobacter sp. MGH 8	sdiA (L354_02593)	hypothetical protein, cystine transport system ATP-binding protein	hypothetical protein	None
	Enterobacter sp. MGH 9	L355_05065	hypothetical protein, cystine transport system ATP-binding protein	hypothetical protein	None
	Enterobacter sacchari SP1	C813_00690	amino acid ABC transporter ATP-binding protein	hypothetical protein	None
		C813_09095	ABC transporter permease	amino acid amidase
	Enterobacter sp. (strain 638)	sdiA (Ent638_2503)	L-cystine ABC transporter ATP-binding protein	putative cytoplasmic protein	None
	Enterobacter sp. Ag1	sdiA (A936_01317)	L-carnitine dehydratase/bile acid-inducible protein F	hypothetical protein	A936_11564/A936_11569
	Enterobacter sp. DC1	sdiA (P346_01363)	putative amino-acid ABC transporter ATP-binding protein YecC	hypothetical protein	P346_00321(ExpR)/P346_00322(swrI)
	Enterobacter sp. DC3	sdiA(P348_00367)	putative amino-acid ABC transporter ATP-binding protein YecC	hypothetical protein	P348_01185(expR)/P348_01184(swrI)
	Enterobacter sp. DC4	sdiA(P349_01346)	putative amino-acid ABC transporter ATP-binding protein YecC	hypothetical protein	P349_01147(expR)/P349_01147(swrI)
	Enterobacter sp. R4-368	H650_05335	ABC transporter	hypothetical protein	None
		H650_21370	ABC transporter permease	amino acid amidase
	Enterobacter sp. SST3	B498_1042	putative amino-acid ABC transporter ATP-binding protein YecC	putative cytoplasmic protein	B498_3992 (PagR)/B498_3991(croI)
	Erwinia amylovora (strain ATCC 49946 / CCPPB 0273 / Ea273 / 27-3)	None	None	None	EAM_1400(expR)/EAM_1401
	Erwinia amylovora (strain CFBP1430)	None	None	None	EAMY_1411(expR)/EAMY_1412(expI)
	Erwinia amylovora 01SFR-BO	None	None	None	BN435_1458(expR)/BN435_14599(expI)
	Erwinia amylovora ACW56400	None	None	None	EaACW_1419(expR)/EaACW_1420(expI)
	Erwinia amylovora ATCC BAA-2158	None	None	None	EAIL5_1452(expR)/EAIL5_1453(expI)
	Erwinia amylovora CFBP 1232	None	None	None	BN437_1453(expR)/BN437_1454(expI)
	Erwinia amylovora CFBP 2585	None	None	None	BN434_1455(expR)/BN434_1456(expI)
	Erwinia amylovora Ea266	None	None	None	BN433_1475(expR)/BN433_1476(expI)
	Erwinia amylovora Ea356	None	None	None	BN432_1460(expR)/BN432_1461(expI)
	Erwinia amylovora Ea644	None	None	None	BN439_1752(expR)/BN439_1753(expI)
	Erwinia amylovora LA635	None	None	None	LA635_1305(expR)/LA635_1306(expI)
	Erwinia amylovora LA636	None	None	None	LA636_1305(expR)/LA636_1306(expI)
	Erwinia amylovora LA637	None	None	None	LA637_1306(expR)/LA637_1307(expI)
	Erwinia amylovora MR1	None	None	None	BN440_1817(expR)/BN440_1818(expI)
	Erwinia amylovora UPN527	None	None	None	BN438_1457(expR)/BN438_1458(expI)
	Erwinia billingiae (strain Eb661)	None	None	None	EbC_11200(smaR)/EbC_11190
					EbC_15710(sdiA)/EbC_15720(phzI)
	Erwinia piriflorinigrans CFBP 5888	None	None	None	EPIR_1516(expR)/EPIR_1517(expI)
					EPIR_2748(expR)/EPIR_2747(expI)
	Erwinia pyrifoliae (strain DSM 12163 / CIP 106111 / Ep16/96)	None	None	None	sdiA (EPYR_02386)/ expI (EPYR_02385)
	Erwinia pyrifoliae (strain Ep1/96)	None	None	None	sdiA(EpC_22130)/phzI(EpC_22120)
	Erwinia sp. (strain Ejp617)	None	None	None	sdiA(EJP617_25090)/phzI(EJP617_25100)
	Erwinia tasmaniensis (strain DSM 17950 / Et1/99)	None	None	None	expR(ETA_09520)/expI(ETA_09530)
					sdiA(ETA_20820)/phzI(ETA_20810)
	Erwinia tracheiphila PSU-1	None	None	None	ETR_20747(EanR )/ETR_20742(EanI)
					ETR_01886/ETR_01881-autoinducer synthase
					ETR_07626-autoinducer synthase
	Escherichia albertii KF1	EAKF1_ch4119	putative amino-acid ABC transporter ATP-binding protein YecC	Hypothetical protein	None
	Escherichia albertii TW07627	ESCAB7627_3479 (sdiA)	Cystine (amino acid) ABC transporter, ATP binding protein	Hypothetical protein	None
	Escherichia coli (strain 'clone D i14')	i14_2146	putative amino-acid ABC transporter ATP-binding component	hypothetical protein	None
	Escherichia coli (strain 'clone D i2')	i02_2146	putative amino-acid ABC transporter ATP-binding component	hypothetical protein	None
	Escherichia coli (strain 55989 / EAEC)	EC55989_2137	putative transporter subunit: ATP-binding component of ABC superfamily transporter	conserved hypothetical protein	None
	Escherichia coli (strain ATCC 33849 / DSM 4235 / NCIB 12045 / K12 / DH1)	EcDH1_1730	Amino acid ABC transporter, ATP binding protein	Hypothetical protein	None
	Escherichia coli (strain ATCC 55124 / KO11)	EKO11_1858	Amino acid ABC transporter, ATP binding protein	Hypothetical protein	None
	Escherichia coli (strain ATCC 9637 / CCM 2024 / DSM 1116 / NCIMB 8666 / NRRL B-766 / W)	ECW_m2090	predicted transporter subunit: ATP-binding component of ABC superfamily	predicted protein	None
	Escherichia coli (strain B / BL21-DE3)	ECBD_1726	ABC transporter related protein	Hypothetical protein	None
	Escherichia coli (strain K12 / DH10B)	ECDH10B_2057	Amino acid ABC transporter, ATP binding protein	Hypothetical protein	None
	Escherichia coli (strain K12 / MC4100 / BW2952)	BWG_1725	Amino acid ABC transporter, ATP binding protein	Hypothetical protein	None
	Escherichia coli str. K-12 substr. MC4100	BN896_1725	putative amino-acid ABC transporter ATP-binding protein YecC	hypothetical protein	None
	Escherichia coli str. K-12 substr. MDS42	ECMDS42_1576	DNA-binding transcriptional co-regulator with RcsB	hypothetical protein	None
	Escherichia coli C321.deltaA	N840_1956	Amino acid ABC transporter, ATP binding protein	Hypothetical protein	None
	Escherichia coli (strain SE11)	ECSE_2147	Amino acid ABC transporter, ATP binding protein	Hypothetical protein	None
	Escherichia coli (strain SMS-3-5 / SECEC)	EcSMS35_1266	putative amino acid ABC transporter ATP-binding protein yecC	conserved hypothetical protein	None
	Escherichia coli (strain UM146)	UM146_07600	putative amino acid ABC transporter ATP-binding protein yecC	conserved hypothetical protein	None
	Escherichia coli (strain UTI89 / UPEC)	UTI89_C2117	putative amino acid ABC transporter ATP-binding protein yecC	hypothetical protein	None
	Escherichia coli 0.1288	EC01288_2105	putative amino acid ABC transporter ATP-binding protein yecC	hypothetical protein	None
	Escherichia coli 0.1304	EC01304_2939	putative amino acid ABC transporter ATP-binding protein yecC	Hypothetical protein	None
	Escherichia coli 07798	EC07798_1904	ABC transporter family protein	Hypothetical protein	None
	Escherichia coli 08BKT055439	EC08BKT55439_2365	ABC transporter family protein	hypothetical protein	None
	Escherichia coli 08BKT77219	EC08BKT77219_2546	ABC transporter family protein	hypothetical protein	None
	Escherichia coli 09BKT024447	EC09BKT24447_2676	ABC transporter family protein	hypothetical protein	None
	Escherichia coli 09BKT076207	EC09BKT76207_2330	ABC transporter family protein	Hypothetical protein	None
	Escherichia coli 09BKT078844	EC09BKT78844_2861	ABC transporter family protein	hypothetical protein	None
	Escherichia coli 1-110-08_S1_C1	AB10_2492	ABC transporter family protein	hypothetical protein	None
	Escherichia coli 1-110-08_S1_C2	AB38_2063	ABC transporter family protein	hypothetical protein	None
	Escherichia coli 1-110-08_S1_C3	AB69_2089	ABC transporter family protein	hypothetical protein	None
	Escherichia coli 1-110-08_S3_C1	AB97_2496	ABC transporter family protein	hypothetical protein	None
	Escherichia coli 1-110-08_S3_C2	AC25_2034	ABC transporter family protein	hypothetical protein	None
	Escherichia coli 1-110-08_S3_C3	AC55_2492	ABC transporter family protein	hypothetical protein	None
	Escherichia coli 1-110-08_S4_C1	AC80_2416	ABC transporter family protein	hypothetical protein	None
	Escherichia coli 1-110-08_S4_C2	AD08_2178	ABC transporter family protein	hypothetical protein	None
	Escherichia coli 1-110-08_S4_C3	AD37_2163	ABC transporter family protein	hypothetical protein	None
	Escherichia coli 1-176-05_S1_C1	AB11_2033	ABC transporter family protein	hypothetical protein	None
	Escherichia coli 1-176-05_S1_C2	AB39_2135	ABC transporter family protein	hypothetical protein	None
	Escherichia coli 1-176-05_S1_C3	AB70_3960	ABC transporter family protein	hypothetical protein	None
	Escherichia coli 1-176-05_S3_C1	AB98_2316	ABC transporter family protein	hypothetical protein	None
	Escherichia coli 1-176-05_S3_C2	AC26_1826	ABC transporter family protein	hypothetical protein	None
	Escherichia coli 1-176-05_S4_C1	AC81_5174	Hypothetical protein	hypothetical protein	None
	Escherichia coli 1-176-05_S4_C3	AD38_2207	ABC transporter family protein	hypothetical protein	None
	Escherichia coli 1.2264	EC12264_3127	ABC transporter family protein	PF10769 family protein	None
	Escherichia coli 1.2741	EC12741_1913	Hypothetical proteon, ABC transporter family protein	PF10769 family protein	None
	Escherichia coli 10.0821	EC100821_2531	ABC transporter family protein	hypothetical protein	None
	Escherichia coli 10.0833	EC100833_2928	putative ABC transporter, ATP-biniding component	hypothetical protein	None
	Escherichia coli 10.0869	EC100869_2676	ABC transporter family protein	hypothetical protein	None
	Escherichia coli 101-1	EC1011_1300	ABC transporter family protein	hypothetical protein	None
	Escherichia coli 110957	HMPREF1588_02957	ABC transporter family protein	hypothetical protein	None
	Escherichia coli 113290	HMPREF1589_00194	arginine ABC transporter, ATP-binding protein ArtM	hypothetical protein	None
	Escherichia coli 113302	HMPREF1590_00329	ABC transporter family protein	hypothetical protein	None
	Escherichia coli 113303	HMPREF1591_01550	ABC transporter family protein	hypothetical protein	None
	Escherichia coli 14A	B230_2778	ABC transporter family protein	hypothetical protein	None
	Escherichia coli 174750	EC174750_1924	ABC transporter family protein	hypothetical protein	None
	Escherichia coli 174900	EC174900_2138	ABC transporter family protein	hypothetical protein	None
	Escherichia coli 178200	EC178200_1889	ABC transporter family protein	hypothetical protein	None
	Escherichia coli 178850	EC178850_2053	ABC transporter family protein	hypothetical protein	None
	Escherichia coli 178900	EC178900_2052	ABC transporter family protein	hypothetical protein	None
	Escherichia coli 179100	EC179100_2238	ABC transporter family protein	hypothetical protein	None
	Escherichia coli 179550	EC179550_2067	ABC transporter family protein	hypothetical protein	None
	Escherichia coli 180050	EC180050_2173	ABC transporter family protein	hypothetical protein	None
	Escherichia coli 180200	EC180200_2063	ABC transporter family protein	hypothetical protein	None
	Escherichia coli 180600	EC180600_2755	ABC transporter family protein	hypothetical protein	None
	Escherichia coli 1827-70	EC182770_4442	ABC transporter family protein	hypothetical protein	None
	Escherichia coli 199900.1	EC1999001_1684	ABC transporter family protein	hypothetical protein	None
	Escherichia coli 2.3916	EC23916_4327	ABC transporter family protein	hypothetical protein	None
	Escherichia coli 2.4168	EC24168_2130	ABC transporter family protein	hypothetical protein	None
	Escherichia coli 201600.1	EC2016001_2712	ABC transporter family protein	hypothetical protein	None
	Escherichia coli 2362-75	EC236275_2939	ABC transporter family protein	hypothetical protein	None
	Escherichia coli 2534-86	EC253486_2669	putative amino-acid ABC transporter ATP-binding protein YecC	hypothetical protein	None
	Escherichia coli 2719100	EC2719100_2360	ABC transporter family protein	hypothetical protein	None
	Escherichia coli 2720900	EC2720900_2402	ABC transporter family protein	hypothetical protein	None
	Escherichia coli 2722950	EC2722950_2115	ABC transporter family protein	hypothetical protein	None
	Escherichia coli 2726800	EC2726800_2487	ABC transporter family protein	hypothetical protein	None
	Escherichia coli 2726950	EC2726950_2160	ABC transporter family protein	hypothetical protein	None
	Escherichia coli 2729250	EC2729250_2136	ABC transporter family protein	hypothetical protein	None
	Escherichia coli 2730350	EC2730350_1998	ABC transporter family protein	hypothetical protein	None
	Escherichia coli 2730450	EC2730450_1594	ABC transporter family protein	hypothetical protein	None
	Escherichia coli 2731150	EC2731150_2199	ABC transporter family protein	hypothetical protein	None
	Escherichia coli 2733950	EC2733950_1987	ABC transporter family protein	hypothetical protein	None
	Escherichia coli 2735000	EC2735000_2173	ABC transporter family protein	hypothetical protein	None
	Escherichia coli 2741950	EC2741950_2180	ABC transporter family protein	hypothetical protein	None
	Escherichia coli 2747800	EC2747800_2238	ABC transporter family protein	hypothetical protein	None
	Escherichia coli 2749250	EC2749250_2200	ABC transporter family protein	hypothetical protein	None
	Escherichia coli 2756500	EC2756500_2104	ABC transporter family protein	hypothetical protein	None
	Escherichia coli 2762100	EC2762100_2174	ABC transporter family protein	hypothetical protein	None
	Escherichia coli 2770900	EC2770900_2134	ABC transporter family protein	hypothetical protein	None
	Escherichia coli 2780750	EC2780750_1382	ABC transporter family protein	hypothetical protein	None
	Escherichia coli 2785200	EC2785200_2108	ABC transporter family protein	hypothetical protein	None
	Escherichia coli 2788150	EC2788150_2121	ABC transporter family protein	hypothetical protein	None
	Escherichia coli 2845350	EC2845350_2253	ABC transporter family protein	hypothetical protein	None
	Escherichia coli 2845650	EC2845650_2241	ABC transporter family protein	hypothetical protein	None
	Escherichia coli 2846750	EC2846750_1966	ABC transporter family protein	hypothetical protein	None
	Escherichia coli 2848050	EC2848050_2139	ABC transporter family protein	hypothetical protein	None
	Escherichia coli 2850400	EC2850400_2278	ABC transporter family protein	hypothetical protein	None
	Escherichia coli 2850750	EC2850750_2298	ABC transporter family protein	hypothetical protein	None
	Escherichia coli 2851500	EC2851500_2114	ABC transporter family protein	hypothetical protein	None
	Escherichia coli 2853500	EC2853500_2176	ABC transporter family protein	hypothetical protein	None
	Escherichia coli 2854350	EC2854350_2179	ABC transporter family protein	hypothetical protein	None
	Escherichia coli 2860050	EC2860050_2281	ABC transporter family protein	hypothetical protein	None
	Escherichia coli 2860650	EC2860650_2127	ABC transporter family protein	hypothetical protein	None
	Escherichia coli 2861200	EC2861200_2176	ABC transporter family protein	hypothetical protein	None
	Escherichia coli 2862600	EC2862600_2033	ABC transporter family protein	hypothetical protein	None
	Escherichia coli 2864350	EC2864350_1997	ABC transporter family protein	hypothetical protein	None
	Escherichia coli 2866350	EC2866350_2165	ABC transporter family protein	hypothetical protein	None
	Escherichia coli 2866450	EC2866450_2166	ABC transporter family protein	hypothetical protein	None
	Escherichia coli 2866550	EC2866550_2150	ABC transporter family protein	hypothetical protein	None
	Escherichia coli 2866750	EC2866750_2097	ABC transporter family protein	hypothetical protein	None
	Escherichia coli 2867750	EC2867750_2324	ABC transporter family protein	hypothetical protein	None
	Escherichia coli 2871950	EC2871950_2109	ABC transporter family protein	hypothetical protein	None
	Escherichia coli 2872000	EC2872000_2239	ABC transporter family protein	hypothetical protein	None
	Escherichia coli 2872800	EC2872800_2144	ABC transporter family protein	hypothetical protein	None
	Escherichia coli 2875000	EC2875000_2112	ABC transporter family protein	hypothetical protein	None
	Escherichia coli 2875150	EC2875150_2251	ABC transporter family protein	hypothetical protein	None
	Escherichia coli 2886-75	B233_2547	ABC transporter family protein	hypothetical protein	None
	Escherichia coli 3.2303	EC32303_2082	ABC transporter family protein	hypothetical protein	None
	Escherichia coli 3.2608	EC32608_0928	ABC transporter family protein	hypothetical protein	None
	Escherichia coli 3.3884	EC33884_3834	ABC transporter family protein	hypothetical protein	None
	Escherichia coli 3.4870	EC34870_2939	ABC transporter family protein	hypothetical protein	None
	Escherichia coli 3003	EC3003_2038	ABC transporter family protein	hypothetical protein	None
	Escherichia coli 3006	EC3006_2302	ABC transporter family protein	hypothetical protein	None
	Escherichia coli 3030-1	EC30301_2237	ABC transporter family protein	hypothetical protein	None
	Escherichia coli 3431	EC3431_1938	ABC transporter family protein	hypothetical protein	None
	Escherichia coli 4.0522	EC40522_2633	ABC transporter family protein	hypothetical protein	None
	Escherichia coli 4.0967	EC40967_4534	ABC transporter family protein	hypothetical protein	None
	Escherichia coli 5.0588	EC50588_2142	ABC transporter family protein	hypothetical protein	None
	Escherichia coli 5.0959	EC50959_4400	ABC transporter family protein	hypothetical protein	None
	Escherichia coli 5.2239	EC52239_2932	ABC transporter family protein	hypothetical protein	None
	Escherichia coli 53638	Ec53638_4276	ABC transporter family protein	hypothetical protein	None
	Escherichia coli 541-1	EC5411_20050	ABC transporter family protein	hypothetical protein	None
	Escherichia coli 541-15	EC54115_05708	ABC transporter family protein	hypothetical protein	None
	Escherichia coli 5412	EC5412_2856	ABC transporter family protein	hypothetical protein	None
	Escherichia coli 576-1	EC5761_02934	ABC transporter family protein	hypothetical protein	None
	Escherichia coli 5905	EC5905_3029	ABC transporter family protein	hypothetical protein	None
	Escherichia coli 75	EC75_21869	ABC transporter family protein	hypothetical protein	None
	Escherichia coli 8.0416	EC80416_2382	ABC transporter family protein	hypothetical protein	None
	Escherichia coli 8.0566	EC80566_1958	ABC transporter family protein	hypothetical protein	None
	Escherichia coli 8.0569	EC80569_1916	ABC transporter family protein	hypothetical protein	None
	Escherichia coli 8.0586	EC80586_2979	ABC transporter family protein	hypothetical protein	None
	Escherichia coli 8.2524	EC82524_2728	ABC transporter family protein	hypothetical protein	None
	Escherichia coli 83972	HMPREF0358_2249	ABC transporter family protein	hypothetical protein	None
	Escherichia coli 88.0221	EC880221_2727	ABC transporter family protein	hypothetical protein	None
	Escherichia coli 88.1042	EC881042_2889	ABC transporter family protein	hypothetical protein	None
	Escherichia coli 88.1467	EC881467_2852	ABC transporter family protein	hypothetical protein	None
	Escherichia coli 89.0511	EC890511_2810	ABC transporter family protein	hypothetical protein	None
	Escherichia coli 9.0111	EC90111_3807	ABC transporter family protein	hypothetical protein	None
	Escherichia coli 90.0039	EC900039_2633	ABC transporter family protein	hypothetical protein	None
	Escherichia coli 90.0091	EC900091_3074	ABC transporter family protein	hypothetical protein	None
	Escherichia coli 90.2281	EC902281_2863	ABC transporter family protein	hypothetical protein	None
	Escherichia coli 900105 (10e)	EC900105_1301	ABC transporter family protein	hypothetical protein	None
	Escherichia coli 907357	HMPREF1592_03632	ABC transporter family protein	hypothetical protein	None
	Escherichia coli 907391	HMPREF1593_03170	ABC transporter family protein	hypothetical protein	None
	Escherichia coli 907446	HMPREF1594_05255	ABC transporter family protein	hypothetical protein	None
	Escherichia coli 907672	HMPREF1595_04622	ABC transporter family protein	hypothetical protein	None
	Escherichia coli 907700	HMPREF1596_00546	ABC transporter family protein	hypothetical protein	None
	Escherichia coli 907701	HMPREF1597_01727	ABC transporter family protein	hypothetical protein	None
	Escherichia coli 907710	HMPREF1598_02676	ABC transporter family protein	hypothetical protein	None
	Escherichia coli 907713	HMPREF1599_05107	ABC transporter family protein	hypothetical protein	None
	Escherichia coli 907715	HMPREF1600_04616	ABC transporter family protein	hypothetical protein	None
	Escherichia coli 907779	HMPREF1601_02791	ABC transporter family protein	hypothetical protein	None
	Escherichia coli 907889	HMPREF1602_02740	ABC transporter family protein	hypothetical protein	None
	Escherichia coli 907892	HMPREF1603_03515	ABC transporter family protein	hypothetical protein	None
	Escherichia coli 908519	HMPREF1604_01385	ABC transporter family protein	hypothetical protein	None
	Escherichia coli 908521	HMPREF1605_03882	ABC transporter family protein	hypothetical protein	None
	Escherichia coli 908522	HMPREF1606_04974	ABC transporter family protein	hypothetical protein	None
	Escherichia coli 908524	HMPREF1607_01752	ABC transporter family protein	hypothetical protein	None
	Escherichia coli 908525	HMPREF1608_00911	ABC transporter family protein	hypothetical protein	None
	Escherichia coli 908541	HMPREF1609_02005	ABC transporter family protein	hypothetical protein	None
	Escherichia coli 908555	HMPREF1610_00683	ABC transporter family protein	hypothetical protein	None
	Escherichia coli 908573	HMPREF1611_00060	ABC transporter family protein	hypothetical protein	None
	Escherichia coli 908585	HMPREF1612_03743	ABC transporter family protein	hypothetical protein	None
	Escherichia coli 908616	HMPREF1613_04042	ABC transporter family protein	hypothetical protein	None
	Escherichia coli 908624	HMPREF1614_04531	ABC transporter family protein	hypothetical protein	None
	Escherichia coli 908632	HMPREF1615_02365	ABC transporter family protein	hypothetical protein	None
	Escherichia coli 908658	HMPREF1616_05028	ABC transporter family protein	hypothetical protein	None
	Escherichia coli 908675	HMPREF1617_04141	ABC transporter family protein	hypothetical protein	None
	Escherichia coli 908691	HMPREF1618_02183	ABC transporter family protein	hypothetical protein	None
	Escherichia coli 909945-2	HMPREF1620_04965	ABC transporter family protein	hypothetical protein	None
	Escherichia coli 910096-2	HMPREF1623_04547	ABC transporter family protein	hypothetical protein	None
	Escherichia coli 93-001	EC93001_2920	ABC transporter family protein	hypothetical protein	None
	Escherichia coli 93.0055	EC930055_2796	ABC transporter family protein	hypothetical protein	None
	Escherichia coli 93.0056	EC930056_2857	ABC transporter family protein	hypothetical protein	None
	Escherichia coli 93.0624	EC930624_2425	ABC transporter family protein	hypothetical protein	None
	Escherichia coli 94.0618	EC940618_2678	ABC transporter family protein	hypothetical protein	None
	Escherichia coli 95.0183	EC950183_2797	ABC transporter family protein	hypothetical protein	None
	Escherichia coli 95.0943	EC950943_2927	ABC transporter family protein	hypothetical protein	None
	Escherichia coli 95.1288	EC951288_2628	ABC transporter family protein	hypothetical protein	None
	Escherichia coli 95JB1	L667_04490	ABC transporter family protein	hypothetical protein	None
	Escherichia coli 95NR1	L668_02265	ABC transporter family protein	hypothetical protein	None
	Escherichia coli 96.0107	EC960107_2768	ABC transporter family protein	hypothetical protein	None
	Escherichia coli 96.0109	EC960109_2907	ABC transporter family protein	hypothetical protein	None
	Escherichia coli 96.0427	EC960427_2830	ABC transporter family protein	hypothetical protein	None
	Escherichia coli 96.0428	EC960428_2701	ABC transporter family protein	hypothetical protein	None
	Escherichia coli 96.0497	EC960497_2165	ABC transporter family protein	hypothetical protein	None
	Escherichia coli 96.0932	EC960932_2863	ABC transporter family protein	hypothetical protein	None
	Escherichia coli 96.0939	EC960939_2740	ABC transporter family protein	hypothetical protein	None
	Escherichia coli 96.154	EC96154_2104	ABC transporter family protein	hypothetical protein	None
	Escherichia coli 97.0003	EC970003_2624	ABC transporter family protein	hypothetical protein	None
	Escherichia coli 97.0007	EC970007_2258	ABC transporter family protein	hypothetical protein	None
	Escherichia coli 97.0010	EC970010_2803	ABC transporter family protein	hypothetical protein	None
	Escherichia coli 97.0246	EC970246_5255	ABC transporter family protein	hypothetical protein	None
	Escherichia coli 97.0259	EC990741_2069	ABC transporter family protein	hypothetical protein	None
	Escherichia coli 97.1742	EC971742_2326	ABC transporter family protein	hypothetical protein	None
	Escherichia coli 99.0670	EC990670_2677	ABC transporter family protein	hypothetical protein	None
	Escherichia coli 99.0672	EC990672_2768	ABC transporter family protein	hypothetical protein	None
	Escherichia coli 99.0678	EC990678_2590	ABC transporter family protein	hypothetical protein	None
	Escherichia coli 99.0713	EC990713_2602	ABC transporter family protein	hypothetical protein	None
	Escherichia coli 99.0741	EC970259_2232	ABC transporter family protein	hypothetical protein	None
	Escherichia coli 99.0814	EC990814_2410	ABC transporter family protein	hypothetical protein	None
	Escherichia coli 99.0815	EC990815_2301	ABC transporter family protein	hypothetical protein	None
	Escherichia coli 99.0816	EC990816_2399	ABC transporter family protein	hypothetical protein	None
	Escherichia coli 99.0839	EC990839_2412	ABC transporter family protein	hypothetical protein	None
	Escherichia coli 99.0848	EC990848_2439	ABC transporter family protein	hypothetical protein	None
	Escherichia coli 99.1753	EC991753_2502	ABC transporter family protein	hypothetical protein	None
	Escherichia coli 99.1762	EC991762_2585	ABC transporter family protein	hypothetical protein	None
	Escherichia coli 99.1775	EC991775_2364	ABC transporter family protein	hypothetical protein	None
	Escherichia coli 99.1781	EC991781_2561	ABC transporter family protein	hypothetical protein	None
	Escherichia coli 99.1793	EC991793_2621	ABC transporter family protein	hypothetical protein	None
	Escherichia coli 99.1805	EC991805_2298	ABC transporter family protein	hypothetical protein	None
	Escherichia coli A25922R	HMPREF1621_03504	ABC transporter family protein	hypothetical protein	None
	Escherichia coli A35218R	HMPREF1622_00607	ABC transporter family protein	hypothetical protein	None
	Escherichia coli AA86	ECAA86_02083	ABC transporter family protein	hypothetical protein	None
	Escherichia coli AD30	ECAD30_03960	ABC transporter family protein	hypothetical protein	None
	Escherichia coli AI27	ECAI27_45420	ABC transporter family protein	hypothetical protein	None
	Escherichia coli APEC O78	APECO78_13365	ABC transporter family protein	hypothetical protein	None
	Escherichia coli ARS4.2123	ECARS42123_2276	ABC transporter family protein	hypothetical protein	None
	Escherichia coli ATCC 25922	K758_12043	ABC transporter family protein	hypothetical protein	None
	Escherichia coli ATCC 35150	O199_0215145	ABC transporter family protein	hypothetical protein	None
	Escherichia coli ATCC BAA-2192	Q455_0220275	ABC transporter family protein	hypothetical protein	None
	Escherichia coli ATCC BAA-2193	Q456_0211660	ABC transporter family protein	hypothetical protein	None
	Escherichia coli ATCC BAA-2196	Q457_10485	ABC transporter family protein	hypothetical protein	None
	Escherichia coli ATCC BAA-2209	Q458_03825	ABC transporter family protein	hypothetical protein	None
	Escherichia coli ATCC BAA-2215	Q459_11320	ABC transporter family protein	hypothetical protein	None
	Escherichia coli ATCC BAA-2219	Q460_18920	ABC transporter family protein	hypothetical protein	None
	Escherichia coli B088	ECCG_00446	ABC transporter family protein	hypothetical protein	None
	Escherichia coli B093	ESNG_01985	ABC transporter family protein	hypothetical protein	None
	Escherichia coli B102	QYC_2620	ABC transporter family protein	hypothetical protein	None
	Escherichia coli B103	S1I_2574	ABC transporter family protein	hypothetical protein	None
	Escherichia coli B104	S35_2496	ABC transporter family protein	hypothetical protein	None
	Escherichia coli B105	S3C_2573	ABC transporter family protein	hypothetical protein	None
	Escherichia coli B106	S3E_2515	ABC transporter family protein	hypothetical protein	None
	Escherichia coli B107	QYE_2935	ABC transporter family protein	hypothetical protein	None
	Escherichia coli B108	S33_2552	ABC transporter family protein	hypothetical protein	None
	Escherichia coli B109	S37_2613	ABC transporter family protein	hypothetical protein	None
	Escherichia coli B112	S3G_2405	ABC transporter family protein	hypothetical protein	None
	Escherichia coli B113	S3I_2481	ABC transporter family protein	hypothetical protein	None
	Escherichia coli B114	S3K_2452	ABC transporter family protein	hypothetical protein	None
	Escherichia coli B15	S1O_2484	ABC transporter family protein	hypothetical protein	None
	Escherichia coli B17	S1Q_2217	ABC transporter family protein	hypothetical protein	None
	Escherichia coli B171	EcB171_5619	ABC transporter family protein	hypothetical protein	None
	Escherichia coli B185	ECDG_01783	ABC transporter family protein	hypothetical protein	None
	Escherichia coli B26-1	S11_2924	ABC transporter family protein	hypothetical protein	None
	Escherichia coli B26-2	S13_3038	ABC transporter family protein	hypothetical protein	None
	Escherichia coli B28-1	QYK_2509	ABC transporter family protein	hypothetical protein	None
	Escherichia coli B28-2	QYM_2563	ABC transporter family protein	hypothetical protein	None
	Escherichia coli B29-1	QYO_2473	ABC transporter family protein	hypothetical protein	None
	Escherichia coli B29-2	QYQ_2491	ABC transporter family protein	hypothetical protein	None
	Escherichia coli B354	ECEG_01232	ABC transporter family protein	hypothetical protein	None
	Escherichia coli B36-1	QYS_2161	ABC transporter family protein	hypothetical protein	None
	Escherichia coli B36-2	QYU_2344	ABC transporter family protein	hypothetical protein	None
	Escherichia coli B40-1	S15_2542	ABC transporter family protein	hypothetical protein	None
	Escherichia coli B40-2	S17_2580	ABC transporter family protein	hypothetical protein	None
	Escherichia coli B41	ECB41_2114	ABC transporter family protein	hypothetical protein	None
	Escherichia coli B49-2	S3A_2559	ABC transporter family protein	hypothetical protein	None
	Escherichia coli B5-2	QYY_2578	ABC transporter family protein	hypothetical protein	None
	Escherichia coli B7-1	QYG_2396	ABC transporter family protein	hypothetical protein	None
	Escherichia coli B7-2	QYI_2086	ABC transporter family protein	hypothetical protein	None
	Escherichia coli B799	ESTG_00375	ABC transporter family protein	hypothetical protein	None
	Escherichia coli B7A	EcB7A_5017	ABC transporter family protein	hypothetical protein	None
	Escherichia coli B83	S1U_2599	ABC transporter family protein	hypothetical protein	None
	Escherichia coli B84	S1W_2598	ABC transporter family protein	hypothetical protein	None
	Escherichia coli B85	S1Y_2517	ABC transporter family protein	hypothetical protein	None
	Escherichia coli B86	S31_2315	ABC transporter family protein	hypothetical protein	None
	Escherichia coli B89	S1K_2417	ABC transporter family protein	hypothetical protein	None
	Escherichia coli B90	S1M_2506	ABC transporter family protein	hypothetical protein	None
	Escherichia coli B93	S1C_2428	ABC transporter family protein	hypothetical protein	None
	Escherichia coli B94	S1E_2617	ABC transporter family protein	hypothetical protein	None
	Escherichia coli B95	S1G_2455	ABC transporter family protein	hypothetical protein	None
	Escherichia coli BCE001_MS16	ECBCE001MS16_1981	ABC transporter family protein	hypothetical protein	None
	Escherichia coli BCE002_MS12	ECBCE002MS12_2168	ABC transporter family protein	hypothetical protein	None
	Escherichia coli BCE006_MS-23	ECBCE006MS23_1906	ABC transporter family protein	hypothetical protein	None
	Escherichia coli BCE007_MS-11	ECBCE007MS11_2198	ABC transporter family protein	hypothetical protein	None
	Escherichia coli BCE008_MS-01	ECBCE008MS01_2035	ABC transporter family protein	hypothetical protein	None
	Escherichia coli BCE008_MS-13	ECBCE008MS13_2305	ABC transporter family protein	hypothetical protein	None
	Escherichia coli BCE011_MS-01	ECBCE011MS01_2005	ABC transporter family protein	hypothetical protein	None
	Escherichia coli BCE019_MS-13	ECBCE019MS13_2087	ABC transporter family protein	hypothetical protein	None
	Escherichia coli BCE030_MS-09	ECBCE030MS09_2133	ABC transporter family protein	hypothetical protein	None
	Escherichia coli BCE032_MS-12	ECBCE032MS12_2088	ABC transporter family protein	hypothetical protein	None
	Escherichia coli BCE034_MS-14	ECBCE034MS14_1726	ABC transporter family protein	hypothetical protein	None
	Escherichia coli BIDMC 19C	L454_02064	ABC transporter family protein	hypothetical protein	None
	Escherichia coli BIDMC 37	L474_02033	ABC transporter family protein	hypothetical protein	None
	Escherichia coli BIDMC 38	L475_02047	ABC transporter family protein	hypothetical protein	None
	Escherichia coli BIDMC 39	L476_02009	ABC transporter family protein	hypothetical protein	None
	Escherichia coli BWH 24	L411_02372	ABC transporter family protein	hypothetical protein	None
	Escherichia coli BWH 32	L403_02079	ABC transporter family protein	hypothetical protein	None
	Escherichia coli Bd5610_99	ECBD561099_2430	ABC transporter family protein	hypothetical protein	None
	Escherichia coli (strain ATCC 8739 / DSM 1576 / Crooks)	EcolC_1723	ABC transporter family protein	hypothetical protein	None
	Escherichia coli C-34666	ECC34666_2328	ABC transporter family protein	hypothetical protein	None
	Escherichia coli CB7326	ECCB7326_2811	ABC transporter family protein	hypothetical protein	None
	Escherichia coli CE418	L341_0220	ABC transporter family protein	hypothetical protein	None
	Escherichia coli CE516	L342_2294	ABC transporter family protein	hypothetical protein	None
	Escherichia coli CE549	L343_0903	ABC transporter family protein	hypothetical protein	None
	Escherichia coli CUMT8	ECMT8_12551	ABC transporter family protein	hypothetical protein	None
	Escherichia coli DEC10A	ECDEC10A_2734	ABC transporter family protein	hypothetical protein	None
	Escherichia coli DEC10B	ECDEC10B_3014	ABC transporter family protein	hypothetical protein	None
	Escherichia coli DEC10C	ECDEC10C_3084	ABC transporter family protein	hypothetical protein	None
	Escherichia coli DEC10D	ECDEC10D_2705	ABC transporter family protein	hypothetical protein	None
	Escherichia coli DEC10E	ECDEC10E_2243	ABC transporter family protein	hypothetical protein	None
	Escherichia coli DEC10F	ECDEC10F_3053	ABC transporter family protein	hypothetical protein	None
	Escherichia coli DEC11A	ECDEC11A_2228	ABC transporter family protein	hypothetical protein	None
	Escherichia coli DEC11B	ECDEC11B_2285	ABC transporter family protein	hypothetical protein	None
	Escherichia coli DEC11C	ECDEC11C_2446	ABC transporter family protein	hypothetical protein	None
	Escherichia coli DEC11D	ECDEC11D_2179	ABC transporter family protein	hypothetical protein	None
	Escherichia coli DEC11E	ECDEC11E_2171	ABC transporter family protein	hypothetical protein	None
	Escherichia coli DEC12A	ECDEC12A_2331	ABC transporter family protein	hypothetical protein	None
	Escherichia coli DEC12B	ECDEC12B_2687	ABC transporter family protein	hypothetical protein	None
	Escherichia coli DEC12C	ECDEC12C_2372	ABC transporter family protein	hypothetical protein	None
	Escherichia coli DEC12D	ECDEC12D_2518	ABC transporter family protein	hypothetical protein	None
	Escherichia coli DEC12E	ECDEC12E_2336	ABC transporter family protein	hypothetical protein	None
	Escherichia coli DEC13A	ECDEC13A_2137	ABC transporter family protein	hypothetical protein	None
	Escherichia coli DEC13B	ECDEC13B_1926	ABC transporter family protein	hypothetical protein	None
	Escherichia coli DEC13C	ECDEC13C_2410	ABC transporter family protein	hypothetical protein	None
	Escherichia coli DEC13D	ECDEC13D_2223	ABC transporter family protein	hypothetical protein	None
	Escherichia coli DEC13E	ECDEC13E_2260	ABC transporter family protein	hypothetical protein	None
	Escherichia coli DEC14A	ECDEC14A_2085	ABC transporter family protein	hypothetical protein	None
	Escherichia coli DEC14B	ECDEC14B_2369	ABC transporter family protein	hypothetical protein	None
	Escherichia coli DEC14C	ECDEC14C_2297	ABC transporter family protein	hypothetical protein	None
	Escherichia coli DEC14D	ECDEC14D_2189	ABC transporter family protein	hypothetical protein	None
	Escherichia coli DEC15A	ECDEC15A_2562	ABC transporter family protein	hypothetical protein	None
	Escherichia coli DEC15B	ECDEC15B_2315	ABC transporter family protein	hypothetical protein	None
	Escherichia coli DEC15C	ECDEC15C_2287	ABC transporter family protein	hypothetical protein	None
	Escherichia coli DEC15D	ECDEC15D_2192	ABC transporter family protein	hypothetical protein	None
	Escherichia coli DEC15E	ECDEC15E_2566	ABC transporter family protein	hypothetical protein	None
	Escherichia coli DEC1A	ECDEC1A_2070	ABC transporter family protein	hypothetical protein	None
	Escherichia coli DEC1B	ECDEC1B_2275	ABC transporter family protein	hypothetical protein	None
	Escherichia coli DEC1C	ECDEC1C_2277	ABC transporter family protein	hypothetical protein	None
	Escherichia coli DEC1D	ECDEC1D_2605	ABC transporter family protein	hypothetical protein	None
	Escherichia coli DEC1E	ECDEC1E_2283	ABC transporter family protein	hypothetical protein	None
	Escherichia coli DEC2A	ECDEC2A_2352	ABC transporter family protein	hypothetical protein	None
	Escherichia coli DEC2B	ECDEC2B_2282	ABC transporter family protein	hypothetical protein	None
	Escherichia coli DEC2C	ECDEC2C_2310	ABC transporter family protein	hypothetical protein	None
	Escherichia coli DEC2D	ECDEC2D_2118	ABC transporter family protein	hypothetical protein	None
	Escherichia coli DEC2E	ECDEC2E_2182	ABC transporter family protein	hypothetical protein	None
	Escherichia coli DEC3A	ECDEC3A_2554	ABC transporter family protein	hypothetical protein	None
	Escherichia coli DEC3B	ECDEC3B_2777	ABC transporter family protein	hypothetical protein	None
	Escherichia coli DEC3C	ECDEC3C_3068	ABC transporter family protein	hypothetical protein	None
	Escherichia coli DEC3D	ECDEC3D_2658	ABC transporter family protein	hypothetical protein	None
	Escherichia coli DEC3E	ECDEC3E_2866	ABC transporter family protein	hypothetical protein	None
	Escherichia coli DEC3F	ECDEC3F_2937	ABC transporter family protein	hypothetical protein	None
	Escherichia coli DEC4A	ECDEC4A_2600	ABC transporter family protein	hypothetical protein	None
	Escherichia coli DEC4B	ECDEC4B_2560	ABC transporter family protein	hypothetical protein	None
	Escherichia coli DEC4C	ECDEC4C_2648	ABC transporter family protein	hypothetical protein	None
	Escherichia coli DEC4D	ECDEC4D_2532	ABC transporter family protein	hypothetical protein	None
	Escherichia coli DEC4E	ECDEC4E_2574	ABC transporter family protein	hypothetical protein	None
	Escherichia coli DEC4F	ECDEC4F_2632	ABC transporter family protein	hypothetical protein	None
	Escherichia coli DEC5A	ECDEC5A_2294	ABC transporter family protein	hypothetical protein	None
	Escherichia coli DEC5B	ECDEC5B_2566	ABC transporter family protein	hypothetical protein	None
	Escherichia coli DEC5C	ECDEC5C_2367	ABC transporter family protein	hypothetical protein	None
	Escherichia coli DEC5D	ECDEC5D_2606	ABC transporter family protein	hypothetical protein	None
	Escherichia coli DEC5E	ECDEC5E_2283	ABC transporter family protein	hypothetical protein	None
	Escherichia coli DEC6A	ECDEC6A_2401	ABC transporter family protein	hypothetical protein	None
	Escherichia coli DEC6B	ECDEC6B_2711	ABC transporter family protein	hypothetical protein	None
	Escherichia coli DEC6C	ECDEC6C_2315	ABC transporter family protein	hypothetical protein	None
	Escherichia coli DEC6D	ECDEC6D_2299	ABC transporter family protein	hypothetical protein	None
	Escherichia coli DEC6E	ECDEC6E_2428	ABC transporter family protein	hypothetical protein	None
	Escherichia coli DEC7A	ECDEC7A_2128	ABC transporter family protein	hypothetical protein	None
	Escherichia coli DEC7B	ECDEC7B_2131	ABC transporter family protein	hypothetical protein	None
	Escherichia coli DEC7C	ECDEC7C_2254	ABC transporter family protein	hypothetical protein	None
	Escherichia coli DEC7D	ECDEC7D_2298	ABC transporter family protein	hypothetical protein	None
	Escherichia coli DEC7E	ECDEC7E_2129	ABC transporter family protein	hypothetical protein	None
	Escherichia coli DEC8A	ECDEC8A_2421	ABC transporter family protein	hypothetical protein	None
	Escherichia coli DEC8B	ECDEC8B_2657	ABC transporter family protein	hypothetical protein	None
	Escherichia coli DEC8C	ECDEC8C_3095	ABC transporter family protein	hypothetical protein	None
	Escherichia coli DEC8D	ECDEC8D_2715	ABC transporter family protein	hypothetical protein	None
	Escherichia coli DEC8E	ECDEC8E_2542	ABC transporter family protein	hypothetical protein	None
	Escherichia coli DEC9A	ECDEC9A_2426	ABC transporter family protein	hypothetical protein	None
	Escherichia coli DEC9B	ECDEC9B_2123	ABC transporter family protein	hypothetical protein	None
	Escherichia coli DEC9C	ECDEC9C_2349	ABC transporter family protein	hypothetical protein	None
	Escherichia coli DEC9D	ECDEC9D_2148	ABC transporter family protein	hypothetical protein	None
	Escherichia coli DEC9E	ECDEC9E_2621	ABC transporter family protein	hypothetical protein	None
	Escherichia coli E101	ESOG_03525	ABC transporter family protein	hypothetical protein	None
	Escherichia coli E110019	EcE110019_3094	ABC transporter family protein	hypothetical protein	None
	Escherichia coli E1167	ERBG_01079	ABC transporter family protein	hypothetical protein	None
	Escherichia coli E128010	ECE128010_5055	ABC transporter family protein	hypothetical protein	None
	Escherichia coli E1520	ERCG_01759	ABC transporter family protein	hypothetical protein	None
	Escherichia coli E1777	L339_04255	ABC transporter family protein	hypothetical protein	None
	Escherichia coli E2265	L340_1651	ABC transporter family protein	hypothetical protein	None
	Escherichia coli E482	ERDG_02770	ABC transporter family protein	hypothetical protein	None
	Escherichia coli EC096/10	G654_18932	ABC transporter family protein	hypothetical protein	None
	Escherichia coli EC1734	ECEC1734_2677	ABC transporter family protein	hypothetical protein	None
	Escherichia coli EC1735	ECEC1735_2806	ABC transporter family protein	hypothetical protein	None
	Escherichia coli EC1736	ECEC1736_2711	ABC transporter family protein	hypothetical protein	None
	Escherichia coli EC1737	ECEC1737_2706	ABC transporter family protein	hypothetical protein	None
	Escherichia coli EC1738	ECEC1738_2774	ABC transporter family protein	hypothetical protein	None
	Escherichia coli EC1845	ECEC1845_2685	ABC transporter family protein	hypothetical protein	None
	Escherichia coli EC1846	ECEC1846_2688	ABC transporter family protein	hypothetical protein	None
	Escherichia coli EC1847	ECEC1847_2683	ABC transporter family protein	hypothetical protein	None
	Escherichia coli EC1848	ECEC1848_2896	ABC transporter family protein	hypothetical protein	None
	Escherichia coli EC1849	ECEC1849_2637	ABC transporter family protein	hypothetical protein	None
	Escherichia coli EC1850	ECEC1850_2874	ABC transporter family protein	hypothetical protein	None
	Escherichia coli EC1856	ECEC1856_2692	ABC transporter family protein	hypothetical protein	None
	Escherichia coli EC1862	ECEC1862_2698	ABC transporter family protein	hypothetical protein	None
	Escherichia coli EC1863	ECEC1863_2431	ABC transporter family protein	hypothetical protein	None
	Escherichia coli EC1864	ECEC1864_2872	ABC transporter family protein	hypothetical protein	None
	Escherichia coli EC1865	ECEC1865_2810	ABC transporter family protein	hypothetical protein	None
	Escherichia coli EC1866	ECEC1866_2550	ABC transporter family protein	hypothetical protein	None
	Escherichia coli EC1868	ECEC1868_2883	ABC transporter family protein	hypothetical protein	None
	Escherichia coli EC1869	ECEC1869_2878	ABC transporter family protein	hypothetical protein	None
	Escherichia coli EC1870	ECEC1870_2625	ABC transporter family protein	hypothetical protein	None
	Escherichia coli EC4013	ECEC4013_2975	ABC transporter family protein	hypothetical protein	None
	Escherichia coli EC4100B	ECoL_04034	ABC transporter family protein	hypothetical protein	None
	Escherichia coli EC4196	ECEC4196_2753	ABC transporter family protein	hypothetical protein	None
	Escherichia coli EC4203	ECEC4203_2771	ABC transporter family protein	hypothetical protein	None
	Escherichia coli EC4402	ECEC4402_2730	ABC transporter family protein	hypothetical protein	None
	Escherichia coli EC4421	ECEC4421_2746	ABC transporter family protein	hypothetical protein	None
	Escherichia coli EC4422	ECEC4422_2880	ABC transporter family protein	hypothetical protein	None
	Escherichia coli EC4436	ECEC4436_2694	ABC transporter family protein	hypothetical protein	None
	Escherichia coli EC4437	ECEC4437_2846	ABC transporter family protein	hypothetical protein	None
	Escherichia coli EC4439	ECEC4439_2682	ABC transporter family protein	hypothetical protein	None
	Escherichia coli EC4448	ECEC4448_2710	ABC transporter family protein	hypothetical protein	None
	Escherichia coli EC96038	ECEC96038_2754	ABC transporter family protein	hypothetical protein	None
	Escherichia coli ECA-0157	ECA0157_22487	ABC transporter family protein	hypothetical protein	None
	Escherichia coli ECA-727	ECA727_02811	ABC transporter family protein	hypothetical protein	None
	Escherichia coli ECC-1470	ECC1470_15591	ABC transporter family protein	hypothetical protein	None
	Escherichia coli ECC-Z	ECCZ_13773	ABC transporter family protein	hypothetical protein	None
	Escherichia coli EPEC C342-62	ECEPECC34262_2486	ABC transporter family protein	hypothetical protein	None
	Escherichia coli EPECa12	ECEPECA12_2277	ABC transporter family protein	hypothetical protein	None
	Escherichia coli EPECa14	ECEPECA14_5355	ABC transporter family protein	hypothetical protein	None
	Escherichia coli Envira 10/1	ECENVIRA101_2484	ABC transporter family protein	hypothetical protein	None
	Escherichia coli Envira 8/11	ECENVIRA811_2404	ABC transporter family protein	hypothetical protein	None
	Escherichia coli F11	EcF11_3434	ABC transporter family protein	hypothetical protein	None
	Escherichia coli FDA504	ECFDA504_2844	ABC transporter family protein	hypothetical protein	None
	Escherichia coli FDA505	ECFDA505_2762	ABC transporter family protein	hypothetical protein	None
	Escherichia coli FDA506	ECFDA506_3258	ABC transporter family protein	hypothetical protein	None
	Escherichia coli FDA507	ECFDA507_2892	ABC transporter family protein	hypothetical protein	None
	Escherichia coli FDA517	ECFDA517_3021	ABC transporter family protein	hypothetical protein	None
	Escherichia coli FRIK1985	ECFRIK1985_2914	ABC transporter family protein	hypothetical protein	None
	Escherichia coli FRIK1990	ECFRIK1990_2888	ABC transporter family protein	hypothetical protein	None
	Escherichia coli FRIK1996	ECFRIK1996_2814	ABC transporter family protein	hypothetical protein	None
	Escherichia coli FRIK1997	ECFRIK1997_2983	ABC transporter family protein	hypothetical protein	None
	Escherichia coli FRIK1999	ECFRIK1999_2955	ABC transporter family protein	hypothetical protein	None
	Escherichia coli FRIK2001	ECFRIK2001_3216	ABC transporter family protein	hypothetical protein	None
	Escherichia coli FRIK523	ECFRIK523_2786	ABC transporter family protein	hypothetical protein	None
	Escherichia coli FRIK920	ECFRIK920_2654	ABC transporter family protein	hypothetical protein	None
	Escherichia coli FVEC1302	ECFG_00760	ABC transporter family protein	hypothetical protein	None
	Escherichia coli FVEC1412	ECGG_00748	ABC transporter family protein	hypothetical protein	None
	Escherichia coli G58-1	ECG581_2287	ABC transporter family protein	hypothetical protein	None
	Escherichia coli H120	EREG_00166	ABC transporter family protein	hypothetical protein	None
	Escherichia coli H252	ERKG_01362	ABC transporter family protein	hypothetical protein	None
	Escherichia coli H263	ERLG_02372	ABC transporter family protein	hypothetical protein	None
	Escherichia coli H299	ECOG_03851	ABC transporter family protein	hypothetical protein	None
	Escherichia coli H397	ESPG_00832	ABC transporter family protein	hypothetical protein	None
	Escherichia coli H489	ERGG_01650	ABC transporter family protein	hypothetical protein	None
	Escherichia coli H494	ESQG_00681	ABC transporter family protein	hypothetical protein	None
[truncated: 2,504 more rows]
